# Supplementary material for: Lamina-specific AMPA receptor dynamics following visual deprivation in vivo
Source: eLife. 2020 Mar 3;9:e52420. doi: 10.7554/eLife.52420 (PMC7053996; doi:10.7554/eLife.52420)
Supplement: Supplementary file 3. [file elife-52420-supp3.xlsx]

## Sheet: Control-V1-L2 3 apical dendrite
				Day1	Day2	Day3	Day4	Day5	Day6	Day10
Mouse ID	ROI	Dendrite ID	SpineID
M1	R01	D1
			S1	0.162476	0.259683	0.24526	0.339792	0.0926088	0.195747	0.103031
			S2	0.529889	0.492153	0.563551	0.38189	0.896913	0.413798	0.929068
			S3	0.549604	0.663894	1.51752	0.769294	1.30134	1.47902	1.27175
			S4	0.887417	1.00752	1.72518	0.885477	0.707732	0.857006	0.997581
			S5	0.869858	1.2389	0.702518	0.533474	0.592407	0.407898	0.759799
			S6	0.677841	0.630507	0.257223	0.551889	0.453722	0.682762	0.765518
			S7	0.58068	0.864782	0.410319	0.521291	0.654591	0.466587	0.93583
			S8	0.958857	0.954161	0.776577	0.602002	0.694811	0.644955	0.956634
			S9	0.982958	0.999948	1.17199	0.569895	0.845402	1.14519	0.862914
			S10	1.1305	1.19162	0.827936	1.02337	1.09394	1.15414	0.824017
			S11	0.776268	0.827027	0.463855	0.5862	0.509589	0.822685	0.536101
			S12	0.801579	0.980411	0.882211	0.860378	0.88445	0.720251	1.20952
M1	R01	D2	S1	0.636376	0.65216	0.825146	0.46032	0.473968	0.517146	0.944104
			S2	0.676876	0.693877	0.617452	0.388059	0.296964	0.304107	0.38788
			S3	1.08177	0.87856	1.46224	1.08217	1.39493	0.817919	1.37024
			S4	0.775538	0.653819	1.00741	0.84766	0.913138	0.576122	0.600366
			S5	0.706686	0.507133	0.823821	0.715672	0.399338	0.398644	1.03837
			S6	0.821324	0.525244	0.812475	0.555302	0.902853	0.689296	0.757502
			S7	0.479337	0.619876	1.27993	0.56074	1.15652	0.667253	0.849087
			S8	1.01985	0.858912	1.26397	1.29291	1.49773	1.01523	1.22202
			S9	0.86457	0.948959	0.888143	0.716408	1.68251	0.51625	0.817709
			S10	0.512832	0.661197	0.589455	0.402473	0.564477	0.595361	0.609946
			S11	0.73964	0.795443	0.7298	0.53746	0.544017	0.465212	0.578455
			S12	0.973298	1.0207	1.81093	0.816759	0.964467	0.464448	1.34469
M1	R01	D3	S1	0.606055	1.08014	0.879097	0.907265	0.94041	0.62112	0.560277
			S2	0.573658	0.600315	0.762098	0.594891	0.821168	0.64821	0.485428
			S3	0.612001	0.600279	1.04221	0.756566	0.533527	0.832913	0.898175
			S4	1.07844	1.55664	1.50965	1.08078	0.681682	0.894859	1.30113
			S5	1.31653	1.09812	1.56654	1.53543	0.806963	1.79573	1.01724
			S6	0.641833	1.21531	2.11434	0.987514	0.81856	0.915219	0.93133
			S7	1.01304	0.516201	0.646189	0.93152	0.504265	0.608235	0.998438
			S8	0.457999	0.78462	0.97451	0.613065	0.495632	0.375604	1.23088
M2	R01	D1	S1	0.17173	0.235334	0.24093	0.15514	0.296716	0.228542	0.395553
			S2	0.105896	0.167207	0.075459	0.115573	0.0363423	0.097116	0.0673267
			S3	0.0815152	0.0667533	0.0768581	0.1161	0.0731261	0.115224	0.0708864
			S4	0.282611	0.338343	0.312446	0.46712	0.384703	0.297147	0.35591
			S5	0.0941291	0.0407094	0.0853137	0.0892046	0.0713978	0.0579964	0.054661
			S6	0.0922612	0.0419179	0.0496982	0.068411	0.162479	0.0790156	0.0471592
			S7	0.13955	0.0774813	0.0536993	0.111429	0.0509256	0.0778033	0.0496622
			S8	0.214764	0.253682	0.319488	0.197322	0.248034	0.201085	0.198661
			S9	0.117227	0.169737	0.172814	0.103922	0.116008	0.194524	0.184634
			S10	0.304309	0.331343	0.170511	0.208973	0.216664	0.196536	0.393824
			S11	0.164367	0.164006	0.198197	0.216151	0.0861428	0.161719	0.134836
			S12	0.142355	0.152539	0.144168	0.0769432	0.141039	0.107748	0.1408
			S13	0.219397	0.368698	0.275685	0.219427	0.176486	0.295681	0.144797
			S14	0.0995188	0.130033	0.124954	0.108097	0.123285	0.132372	0.0397987
			S15	0.0418316	0.0829108	0.0891186	0.100354	0.0966133	0.0494117	0.0366328
			S16	0.106061	0.135356	0.126063	0.0667758	0.103379	0.112286	0.111961
			S17	0.186336	0.367975	0.485427	0.262572	0.33458	0.233572	0.345434
			S18	0.0916881	0.105966	0.109313	0.0595602	0.0743009	0.0945208	0.0982397
			S19	0.390531	0.18756	0.516185	0.177394	0.282368	0.330169	0.162522
M2	R01	D2	S1	0.14256	0.158062	0.154165	0.23709	0.232262	0.052013	0.175731
			S2	0.39865	0.434916	0.497968	0.280062	0.444415	0.602715	0.419515
			S3	0.83268	0.634136	0.687729	0.6775	0.591547	1.08471	0.691629
			S4	0.183188	0.130216	0.16049	0.374514	0.374014	0.354055	0.291729
			S5	0.135518	0.168014	0.198319	0.111998	0.192021	0.197962	0.231818
			S6	0.207755	0.19491	0.179816	0.16369	0.332137	0.194841	0.151092
			S7	0.27887	0.287816	0.209152	0.274953	0.346728	0.342516	0.360353
			S8	0.435022	0.350444	0.223036	0.337661	0.260139	0.459729	0.263726
			S9	0.355351	0.289778	0.330719	0.247336	0.305582	0.535224	0.56972
M2	R01	D3	S1	0.297822	0.279644	0.188971	0.242396	0.139854	0.203061	0.201684
			S2	0.273808	0.258546	0.148388	0.173981	0.192914	0.203963	0.265023
			S3	0.286321	0.18898	0.320275	0.183641	0.41163	0.233317	0.303399
			S4	0.248258	0.145429	0.168908	0.173982	0.19537	0.172523	0.204296
			S5	0.265053	0.16364	0.18774	0.16284	0.223041	0.186996	0.20009
			S6	0.241089	0.11649	0.17679	0.271974	0.199634	0.165278	0.187165
			S7	0.0915758			0.0859336	0.0737631	0.0707761
M2	R02	D1	S1	0.141989	0.160723	0.246717	0.119746	0.136553	0.10374	0.136566
			S2	0.105203	0.0563599	0.0539757	0.087221	0.0870123	0.0705299	0.0717811
			S3	0.0307536	0.0518399	0.0237775	0.0428423	0.030393	0.034797	0.0196335
			S4	0.233263	0.191022	0.102469	0.177265	0.245847	0.171335	0.167208
			S5	0.200012	0.125387	0.107949	0.16659	0.0974874	0.0952249	0.043855
			S6	0.278722	0.147372	0.101093	0.148089	0.16694	0.134194	0.109911
			S7	0.121074	0.141237	0.120733	0.0578862	0.0799779	0.13168	0.0921114
			S8	0.112639	0.209573	0.0935985	0.0677172	0.0928678	0.0914447	0.0324583
			S9	0.0770199	0.123367	0.0631425	0.0763093	0.0502821	0.0625648	0.0812034
			S10	0.276861	0.28311	0.11775	0.172466	0.21937	0.217419	0.151534
			S11	0.498659	0.214772	0.29016	0.317967	0.345678	0.175996	0.18653
			S12	0.101687	0.0317568	0.0414574	0.116286	0.0407427	0.0594763	0.046205
			S13	0.142884	0.0836411	0.148314	0.115859	0.105171		0.0999888
			S14	0.13619	0.107509	0.0962988	0.198274	0.121257	0.281929	0.0989448
			S15	0.131199	0.219137	0.0717831	0.311623	0.179252	0.148023	0.114516
			S16	0.69114	0.305506	1.21738	0.620992	0.466632	0.559908	0.595286
			S17	0.276941	0.134914	0.113438	0.219826	0.141841	0.157635	0.165479
			S18	0.103472	0.0720892	0.0828986	0.0582574	0.0499064	0.0794583	0.137585
			S19	0.114023	0.122537	0.0835361	0.0550473	0.0319274	0.0434677	0.0279499
			S20	0.11143	0.0822421	0.0524589	0.0737118	0.0901181	0.0485122	0.0600647
			S21	0.153105	0.0881046	0.102112	0.0641963	0.0928924	0.0691573	0.0710403
			S22	0.18545	0.121074	0.0927269	0.0762802	0.0603567	0.0714833	0.0696051
			S23	0.143755	0.0805392	0.0855632	0.0978258	0.088318	0.0628257	0.0725865
			S24	0.171904	0.0767015	0.0623698	0.0432908	0.0649631	0.0463265	0.0421666
			S25	0.418257	0.309512	0.300068	0.501208	0.309522	0.250147	0.288179
			S26	0.0757228	0.0635087	0.0647535	0.100821	0.0651387	0.0800971	0.0724169
			S27	0.196826	0.189099	0.115955	0.0998279	0.095478	0.0770344	0.077596
			S28	0.184592	0.270431	0.235286	0.21899	0.183545	0.17572	0.167376
			S29	0.0916143	0.0747327	0.157584	0.106315	0.062421	0.091727	0.0481737
			S30	0.0794221	0.0852367	0.105523	0.0498081	0.0995212	0.0610161	0.0570063
			S31	0.274571	0.126325	0.270937	0.225218	0.187753	0.163423	0.150944
			S32	0.0831829	0.192903	0.0970162	0.11025	0.0556539	0.0649248	0.0647704
			S33	0.0966188	0.104596	0.0635187	0.0687221	0.0644961	0.092823	0.0729577
			S34	0.192901	0.0782539	0.118061	0.148054	0.0529699	0.0820856	0.0515413
			S35	0.124712	0.137943	0.213338	0.1163	0.147969	0.131647	0.170516
			S36	0.203523	0.196864	0.474528	0.151992	0.21726	0.0875837	0.218485
			S37	0.0388483	0.0232977	0.0604416	0.0400594	0.0523215	0.0475387	0.0406801
			S38	0.408763	0.193983	0.224017	0.281399	0.279636	0.293772	0.170028
			S39	0.134274	0.0355379	0.0530816	0.0638316	0.0875806	0.095378	0.0748693
M3	R01	D1	S1	0.621749	0.47301	0.427632	0.560792	0.76346	0.467616	0.922892
			S2	0.80932	0.835622	0.741452	0.605228	0.85774	1.29216	1.18715
			S3	0.29998	0.29666	0.415648	0.199799	0.478425	0.284499	0.389614
			S4	0.163695	0.154717	0.152038	0.308674	0.393065	0.231263	0.239953
			S5	0.165805	0.180256	0.217933	0.237651	0.230123	0.18173	0.237304
			S6	0.709507	0.358848	0.411936	0.231563	0.51331	0.557458	0.487216
			S7	0.329313	0.274312	0.351151	0.349639	0.2532	0.55978	0.439203
			S8	0.41373	0.30839	0.238623	0.507013	0.325241	0.520303	0.563338
M3	R01	D2	S1	0.160428	0.264222	0.153431	0.190753	0.141551	0.150808	0.29732
			S2	0.304046	0.261597	0.133096	0.259267	0.202102	0.208868	0.250345
			S3	0.320338	0.429186	0.275501	0.221063	0.216539	0.25994	0.307557
			S4	0.226177	0.187482	0.257515	0.285932	0.240345	0.264423	0.405991
			S5	0.28286	0.600707	0.441234	0.186966	0.655589	0.54885	0.303113
			S6	0.368304	0.256541	0.145824	0.177311	0.115771	0.209807	0.126315
			S7	0.134952	0.225808	0.416691	0.323464	0.274383	0.236647	0.394311
			S8	0.646539	0.367025	0.441646	0.352132	0.328895	0.392632	0.463421
M3	R01	D3	S1	0.892918	0.565555	0.620876	0.85176	1.17786	0.877783	0.974581
			S2	0.428429	0.526653	0.510495	0.453755	0.675031	0.408385	0.344694
			S3	0.8482	0.514574	0.739278	0.632629	0.914954	0.434014	0.584721
			S4	0.636114	0.540059	0.443006	0.94189	0.697314	0.59897	0.764279
			S5	0.330952	0.519092	0.313517	0.279638	0.466588	0.255977	0.256262
M3	R01	D4	S1	0.549995	0.551846	0.419649	0.281347	0.97903	0.503978	0.644353
			S2	0.354932	0.531648	0.551283	0.534706	0.406542	0.53908	0.536832
			S3	0.601878	0.303095	0.480637	0.373834	0.265588	0.316619	0.431098
			S4	0.270665	0.171906	0.358258	0.111158	0.363332	0.272881	0.470891
			S5	0.472156	0.542995	0.43027	0.773614	0.501967	0.554295	0.602328
			S6	0.661307	0.363004	0.690987	1.02197	0.451657	0.926339	0.561554
			S7	0.289868	0.391629	0.632591	0.400116	0.236375	0.391908	0.483227
			S8	0.361031	0.596477	0.445818	0.480796	0.538778	0.587672	0.63671
			S9	0.173257	0.230369	0.258589	0.158407	0.150916	0.311411
			S10	0.471097	0.830463	0.532062	0.537769	0.824404	0.708323	0.665968
M3	R02	D1	S1	0.790203	0.707606	1.29154	1.36703	0.837386	0.69185	0.875058
			S2	0.297528	0.601336	0.523582	0.396917	0.34371	0.42056	0.515384
			S3	1.05735	1.02331	0.439316	0.356295	0.408198	0.833085	1.23646
			S4	0.14675	0.145905	0.147313	0.32207	0.174143	0.130836	0.123064
			S5	0.529066	0.288427	0.343666	0.367743	1.12215	0.479746	0.341435
			S6	0.384192	0.470533	0.447659	0.711582	0.678089	0.439253	0.945062
M4	R01	D1	S1	0.587243	0.554869	0.421408	0.356332	0.305219	0.357185	0.5669
			S2	0.286546	0.416693	0.178178	0.35325	0.209743	0.475459	0.261157
			S3	0.606081	0.636244	0.275048	0.44	0.195302	0.316651	0.275391
			S4	0.817462	0.740059	0.828752	0.544266	0.613805	0.555553	0.923526
			S5	0.383591	0.785668	0.343104	0.226654	0.260366	0.117199	0.375538
			S6	0.826632	0.807482	0.75921	0.713423	0.545539	0.896138	0.630702
M4	R01	D2	S1	0.845991	0.216029	0.741892	0.618285	0.731703	0.815713	0.411575
			S2	0.361049	0.490038	0.286829	0.264153	0.255557	0.416541	0.261631
			S3	0.626053	0.551813	0.538092	0.351431	0.415103	0.412835	0.142257
			S4	0.420723	0.604231	0.406009	0.520472	0.446763	0.414375	0.541679
			S5	0.539988	0.286015	0.400047	0.640919	0.445522	0.260387	0.299317
			S6	0.587792	0.594721	0.72133	0.504525	0.776273	0.534406	0.704183
			S7	0.32743	0.418375	0.209408	0.410007	0.466634	0.45837	0.237872
			S8	0.417324	0.50247	0.732632	0.745703	0.893705	0.422934	0.844291
			S9	0.406486	0.925613	1.11708	0.791282	0.530205	0.638152	0.552745
			S10	0.541748	0.471041	0.636381	0.469339	0.401376	0.392889	0.275287
			S11	0.542316	0.396229	0.842402	0.406362	0.34802	0.231602	0.34468
			S12	0.228412	0.374648	0.459575	0.274717	0.332682	0.294613	0.444997
			S13	0.301245	0.205679	0.421161	0.356635	0.455965	0.517406	0.265763
			S14	0.386069	0.337231	0.112397	0.314077	0.220388	0.407979	0.317119
			S15	0.358634	0.321024	0.244593	0.470762	0.387692	0.265026	0.216107
M4	R02	D1	S1	0.322358	0.317805	0.564359	0.302329	0.276306	0.323354	0.447378
			S2	0.587879	0.435254	0.527055	0.406675	0.445855	0.509785	0.369604
			S3	0.399874	0.508392	0.684068	0.482393	0.64637	0.314544	0.485236
			S4	0.324302	0.374757	0.461802	0.153164	0.364325	0.323322	0.357529
M4	R02	D2	S1	0.843251	0.492669	0.925027	0.824921	0.714865	1.13871	0.654775
			S2	1.00776	1.10015	1.01528	0.910395	0.54761	0.795441	0.473066
			S3	1.50622	0.851568	1.26666	1.36096	0.68871	0.851119	0.94111
			S4	0.785073	0.77128	1.26075	1.18373	1.92632	0.9449	1.03059
			S5	0.819432	0.727305	0.863121	0.688942	0.905659	0.72904	0.646418
			S6	0.46041	0.429952	0.698298	0.601691	0.496018	0.323505	0.355606
M4	R02	D3	S1	0.196116	0.306861	0.350394	0.285795	0.435969	0.248321	0.40846
			S2	0.464206	0.233925	0.305991	0.449047	0.363069	0.221639	0.381637
			S3	0.347039	0.461756	0.224907	0.323311	0.294068	0.342621	0.281856
			S4	0.638382	0.538561	0.413686	0.473482	0.420739	0.492255	0.271177
			S5	0.423983	0.415	0.2439	0.432488	0.231093	0.254591	0.309146
			S6	0.391133	0.358962	0.211554	0.324644	0.291614	0.363019	0.261829
			S7	0.246865	0.429888	0.241618	0.282969	0.253788	0.213601	0.261059
			S8	0.949683	0.771313	0.977578	0.687129	0.44573	0.716417	0.386447
			S9	0.785143	0.806183	0.866699	0.574412	0.594657	1.47504	0.821365
			S10	0.36841	0.254697	0.359999	0.425013	0.322599	0.438797	0.295269
			S11	0.441254	0.357384	0.565244	0.538596	0.781935	0.885745	0.644966
			S12	0.405467	0.335425	0.647952	0.487444	0.886477	0.685081	0.469515
			S13	0.448097	0.381584	0.44856	0.250011	0.660058	0.461382	0.689171
			S14	0.527742	0.536136	0.404137	0.427461	0.745301	0.678001	0.588936
			S15	0.67488	0.311185	0.342724	0.472058	0.440271	0.463631	0.493356
M5	R01	D1	S1	0.284721	0.73351	0.399358	0.239015	0.402806	0.419795
			S2	0.285816	0.452883	0.189389	0.140273	0.224239	0.224723	0.474135
			S3	1.08444	1.60601	0.997044	1.48604	1.35529	0.743825	0.744173
			S4	1.19091	0.933383	0.809568	0.360952	1.24589	0.723508	1.28088
			S5	0.728188	1.36014	0.902455	0.498244	1.57667	0.486531	1.02399
			S6	1.27701	0.974839	3.37807	1.623	1.13314	1.47781
			S7	0.872638	0.417795	0.480545	0.511297	0.602023	0.424636	0.839949
			S8	1.04997	0.460032	0.43244	0.896841	0.641603	1.01241	1.10815
M5	R01	D2	S1	0.439823	0.50917	0.53549	1.15454	0.693024	0.568655	0.669074
			S2	0.427217	0.425647	0.626361	0.908739	0.500881	0.544703	0.495303
			S3	0.296627	0.267301	0.232034	0.446144	0.383126	0.334527	0.259774
			S4	0.502645	0.451768	0.659049	0.397941	0.312208	0.426336	0.884833
			S5	0.414729	0.407478	0.374671	0.661459	0.46792	0.50284	0.637021
			S6	0.662842	0.509642	0.869105	0.496179	0.678093	0.851181	0.814323
			S7	1.24209	1.33429	1.46963	1.02653	1.32851	1.42278	1.63499
			S8	1.65472	1.06546	0.932292	0.612839	1.48757	1.40266	1.30878
			S9	0.391895	0.374092	0.267002	0.248145	0.244125	0.611151	0.360266
			S10	0.4297	0.37193	0.597482	0.257457	0.317119	0.704139	0.472402
M5	R01	D3	S1	1.12109	1.3215	1.0412	1.60503	0.825371	0.752354	1.11759
			S2	0.896563	0.839836	0.809822		1.5241	1.31686
			S3	0.497188	0.465535	0.443089	0.86883	0.257734	0.530325	0.681357
			S4	3.2373	1.44639	2.44291		1.09567	1.37177	2.03266
			S5	0.315003	0.416064	0.338107	0.322865	0.305408	0.250905
M6	R01	D1	S1	0.47023	0.697102	0.349974	0.248433	0.149979	0.408629	0.491972
			S2	0.821766	0.482219	0.491954	0.359192	0.417121	0.884374	0.239464
			S3	0.779343	0.527792	0.504677	0.859964	0.618452	0.739031	0.641285
			S4	0.580161	0.692131	0.382037	0.308975	0.654392	0.341132	0.619002
			S5	0.635385	0.665616	0.665719	0.854226	0.861337	1.03249	1.16505
			S6	0.534067	0.364056	0.563919	2.01447	0.974922	0.53604	1.16368
			S7	0.551209	0.463928	0.657779	0.252241		0.363239	0.486165
			S8	0.358396	0.342061	0.351929	0.273871	3.20279	0.139747	0.194534
			S9	1.20469	0.665353	1.13706	0.924468	4.03757	1.4552	1.08527
			S10	0.466089	0.696476	0.624302	0.784879	0.898381	0.942884	0.876204
			S11	0.47843	0.312387	0.180548	0.286018	0.311417	0.659722	0.431064
			S12	1.43702	1.85429	0.539954	0.680364	0.742571	0.862043	1.89764
			S13	0.923728	0.594634	0.908794	0.96447	1.27686	1.20946	1.86695
			S14	0.770863	1.0698	0.484286	1.09312	0.8699	0.909243	1.38019
			S15	1.19199	0.375954	0.707849	0.857127	0.621082	0.968083	1.43802
			S16	1.01844	0.949435	0.702963	0.969413		1.06059	2.3368
			S17	0.400463	0.466751	0.558509	1.10079	0.685706	0.846107	1.05279
			S18	0.664073	0.746006	0.920029	0.562067	0.433286	0.826912	1.18392
			S19	0.279017	0.295662	0.188386	0.50449	0.333829	0.42937	0.352692
			S20	0.544932	0.480238	0.376038	0.333946	0.675325	0.73905	0.938706
			S21	0.551269	0.921769	0.644547	0.665031	2.12891	0.620011	1.44552
			S22	0.775401	0.448787	0.401563	0.47186	1.40045	0.48549	0.925768
			S23	2.64484	0.732992	1.98462	1.29478	0.851233	1.17117	0.928838
			S24	0.498916	0.436901	0.518938	0.274547	0.486473	0.745105	0.29941
			S25	0.369476	0.437606	0.57744	0.575518	0.770661	0.593626	0.98998
			S26	0.487204	0.663689	0.951267	0.402976	0.777771	0.58354
			S27	0.882931	0.688792	0.808298	0.635844	1.69413	0.552975	1.24203
			S28	0.797011	0.566128	0.743391	0.573484	3.66183	0.446422	0.665301
			S29	0.289902	0.307782	0.254723	0.332168	0.353333	0.477903	0.213115
			S30	0.784423	1.34033	0.50458	0.389679	0.339778	0.382405	1.12598
			S31	0.515711	0.619989	0.577131	0.304048	0.703003	0.434372	1.20311
			S32	4.54973	2.46405	1.90735	3.71355	1.97872	3.045	2.50339
			S33	0.70877	1.02877	0.150288	0.64954	1.03904	0.833806	0.757717
			S34	0.428051	0.716956	1.66709	0.475732	1.13551	0.616979	1.26348
			S35	0.668348	0.573659	0.87566	0.66338	0.465553	0.784865	1.32297
M6	R01	D2	S1	1.9935	1.40946	0.649185	0.564245	0.772017	0.687035	0.823561
			S2	0.375577	0.654426	0.220652	0.332505	0.583247	0.211257	0.421394
			S3	0.717642	0.461678	0.729292	0.891319	0.459303	0.356909	0.592188
			S4	1.07804	0.335674	0.569244	0.342119	0.387101	0.516342	0.549209
			S5	0.692525	1.08776	1.5276	0.24602	0.641277	0.671722	1.04104
			S6	1.61946	0.951707	1.09397	2.36127	2.36082	1.52385	1.69728
			S7	1.14576	1.03963	0.715324	0.622719	0.461028	0.700441	0.89045
			S8	0.637919	0.581685	0.80577	0.875258	1.03719	1.1918	0.972371
			S9	0.503246	0.824382	0.664354	0.548424	0.48828	0.473394	2.71963
			S10	1.51749	3.40519	1.4167	1.9233	1.39486	1.35922	0.814571
			S11	0.635865	0.35847	0.527814	1.07162	0.549483	1.29414	0.681067
			S12	0.61188	0.461714	0.667132	0.845453	0.713502	0.730094	0.696316
			S13	0.731561	0.590443	0.775036	0.577266	0.840412	0.581593	0.775554
			S14	2.07554	1.33471	1.27641	1.4701	1.16541	3.46185	0.643461
			S15	0.58141	0.3229	0.380407	0.976984	0.575638	0.794892	0.886071
			S16	0.850242	0.36534	0.717111	0.477203	0.566138	0.803278	0.767253
			S17	0.482201	0.442456	0.201498	0.567204	0.656585	0.435064	0.511348
			S18	0.513516	0.528453	0.439098	0.884867	1.13314	0.849696	0.329716
			S19	0.96801	0.653674	2.90967	0.595626	0.409341	0.52193	0.654452
			S20	0.119055	0.205557	0.373778	0.246816	0.19871	0.443114	0.425729
M6	R01	D3	S1	0.299781	0.343863	0.274181	0.621146	0.613458	0.582828	0.425403
			S2	0.576699	0.405569	0.315569	0.382909	0.433858	0.471011	0.443416
			S3	0.152137	0.208173	0.288149	0.134634	0.225886	0.193692	0.201892
			S4	0.221888	0.24282	0.254936	0.184117	0.2023	0.203074	0.502304
			S5	0.848981	0.790495	0.892485	0.677249	0.641224	0.890464	0.779776
			S6	0.545375	0.284789	0.710203	0.431703	0.432825	0.361123	0.438983
			S7	0.740268	0.471422	0.636594	0.463074	0.571918	0.432524	0.464381
			S8	0.342084	0.158562	0.374018	0.267857	0.25659	0.562708	0.459578
			S9	0.543573	0.873454	0.452028	0.646031	0.449626	0.800939	0.676113
			S10	0.575116	0.536142	0.911849	0.624725	0.427685	0.553211	0.777483
			S11	0.186263	0.130728	0.277066	0.355758	0.300194	0.272718	0.248335
			S12	0.545922	0.978125	0.563473	0.623362	0.385862	0.523756	0.764651
			S13	0.547006	0.972364	0.290423	0.499494	0.44536	0.24337

## Sheet: VD-V1-L23 apical dendrites
				BL1	BL2	BL3	VD1	VD2	VD3	VD7
Mouse ID	ROI	Dendrite ID	Spine ID
M1	R01	D1	S1	0.971886	0.856949	0.975046	0.924988	1.61233	0.753024	1.24585
			S2	1.21354	1.6663	1.48535	1.78498	1.12272	1.35411	1.30735
			S3	1.17956	0.616832	0.460103	0.503724	1.24985	1.24719	0.586411
			S4	1.40994	1.34289	1.35669	1.28386	1.75004	1.42477	1.43779
			S5	0.418486	0.397286	0.664086	0.644779	0.607752	0.759073	0.440476
			S6	1.33904	1.5445	1.11057	1.40212	2.22743	1.57687	3.63141
			S7	1.42514	2.67413	2.81783	1.69618	3.00737	1.91975	5.02555
			S8	0.898595	1.48205	1.31737	1.79339	2.13705	1.44506	3.32201
			S9	0.861723	0.819642	1.48482	1.0579	0.981522	1.65283	2.28836
			S10	0.348805	0.407121	1.0782	0.438412	0.512701	0.966586	0.546574
			S11	0.588452	0.626839	0.502843	0.476546	1.39947	0.871678	0.827051
			S12	2.69734	2.5667	1.57297	2.24009	2.20177	2.78286	2.84212
			S13	0.628767	0.914988	1.005	0.846267	1.14636	1.16202	1.393
			S14	1.2161	1.25799	1.27883	1.05172	1.30778	1.28886	2.90154
M1	R01	D2	S1	2.39326	3.06969	3.69424	2.67854	2.38147	2.29655	2.92652
			S2	1.19781	1.23961	1.37965	1.92294	2.16858	1.821	1.90557
			S3	0.52552	0.385986	1.57817	0.797716	1.34081	1.30866	1.57325
			S4	0.629919	0.513964	0.516942	0.374105	0.81721		0.648238
			S5	0.892431	0.72849	1.20312	0.719454	0.973321	1.11044	1.53975
			S6	1.4855	1.48368	2.35132	0.963967	1.55757	1.60941	1.24374
			S7	1.55916	1.35734	2.3517	1.4338	1.09304	1.35571	1.85667
			S8	0.653027	0.765013	1.0897	1.15104	1.08703	1.50978	2.44104
			S9	1.1905	1.2028	1.11188	0.984924	1.53626	2.84631	2.19879
			S10	1.03884	1.56847	1.0532	1.93533	1.48237	1.51568	1.74334
			S11	1.41396	1.31797	1.28601	1.25637	0.675212	0.91368	1.04426
			S12	0.727571	0.868389	1.20022	1.10191	0.48528	0.951706	0.692648
			S13	0.629907	0.959824	0.93596	0.743336	0.765165	1.00804	0.72093
M2	R01	D1	S1	2.00155	2.09706	2.42333	2.25302	0.982456	2.31542	1.2222
			S2	0.705083	0.6664	0.560433	0.424352	0.711998	0.744384	0.749091
			S3	0.743647	0.855341	0.537146	0.641204	0.697557	0.726088	0.886845
			S4	0.23821	0.310356	0.267651	0.252701	0.223272	0.459709	0.190053
			S5	0.823459	1.05929	0.857943	1.08166	0.924633	1.09934	2.13452
			S6	0.492662	0.394837	0.364966	0.265508	0.317539	0.39503	0.453897
			S7	0.380812	0.31586	0.353983	0.507658	0.286974	0.238162	0.504749
			S8	0.300937	0.439253	0.173721	0.241706	0.242248	0.300276	0.281249
			S9	0.491071	0.517024	0.335018	0.318895	0.299689	0.408789	0.689802
			S10	0.534362	0.733243	0.592748	0.681535	0.414673	0.438628	0.890004
			S11	0.958243	0.652081	0.514409	0.827647	0.430799	0.579505	0.507436
			S12	0.489892	0.691643	0.375032	0.53568	0.562448	0.492104	0.394339
M2	R01	D2	S1	0.447466	0.454716	0.395728	0.769252	0.461609	0.82668	0.553477
			S2	0.871724	1.01823	0.777624	0.770145	0.747326	0.773845	1.23986
			S3	0.673503	0.586718	0.551619	0.627455	0.719253	0.694164	1.24988
			S4	0.87166	1.04348	0.723152	1.23163		1.01534	0.832754
			S5	0.568172	1.08653	0.667066	0.630465	0.847772	0.794062	1.47991
			S6	0.426726	0.377748	0.408238	0.341935	0.878602	0.354332	0.592412
			S7	0.61274	1.25378	0.487279	0.566658	0.526799	0.367147	1.18615
			S8	0.5333	0.485368	0.357036	0.450156	0.506298	0.638229	0.760153
			S9	0.813029	1.22143	1.04348	0.934252	1.28687	1.08455	0.900334
			S10	0.335635	0.28341	0.404272	0.303541	0.386584	0.243116	0.327752
M2	R01	D3	S1	1.21965	0.871205	1.29541	0.936479	2.00664	0.840943	1.80717
			S2	1.87154	1.29544	2.44759	1.73292	2.18913	1.70296	3.62645
			S3	0.205115	0.521477	0.16666	0.211879	0.328495	0.217786	0.378835
			S4	1.91734	1.7235	1.57969	1.49241	2.61659	2.31428	3.11713
			S5	0.525535	1.57718	0.706676	0.617609	0.972726	0.826789	1.13593
			S6	0.466609	0.417526	0.594673	0.687283	0.584896	0.495813	0.590578
			S7	0.276279	0.248649	0.176925	0.196447	0.320589	0.257541	0.36244
			S8	0.139173	0.83446	0.173058	0.293378	0.604505	0.2269	0.286482
M2	R01	D4	S1	0.253415	0.325656	0.347263	0.339189	0.3252	0.329454	0.532674
			S2	0.267523	0.280747	0.317828	0.306634	0.22603	0.27815	0.327283
			S3	0.378	0.499892	0.456427	0.563076	0.696096	0.681686	0.702469
			S4	0.308876	0.492755	0.384814	0.447205	0.52643	0.410791	0.940283
			S5	0.370056	0.37226	0.302604	0.579624	0.378937	0.631576	0.650677
			S6	0.567597	0.785986	0.471357	0.617389	0.5988	0.547029	0.7307
			S7	0.173714	0.195441	0.167794	0.220225	0.170705	0.218962	0.436604
			S8	0.233605	0.281631	0.30816	0.275831	0.294698	0.2642	0.727822
			S9	0.290524	0.390561	0.348285	0.403638	0.470397	0.454132	0.652217
			S10	0.294237	0.285309	0.228585	0.35803	0.381371	0.386241	0.493064
			S11	0.32072	0.317358	0.395308	0.414908	0.544789	0.493872	0.84882
			S12	0.284214	0.316362	0.413596	0.488308	0.410321	0.322992	0.60343
			S13	0.372827	0.396601	0.497228	0.616156	0.516223	0.667777	0.717925
			S14	0.231125	0.431562	0.31938	0.330563	0.334756	0.468542	0.451353
			S15	0.201577	0.396755	0.307006	0.271647	0.292207	0.312567	0.357647
			S16	0.559004	0.64923	0.604851	0.452763	0.521737	0.587581	0.86673
			S17	0.259124	0.340913	0.304851	0.39179	0.305518	0.412583	0.440499
			S18	0.40657	0.567237	0.556466	0.606737	0.586044	0.770274	0.84063
			S19	0.299442	0.337753	0.388893	0.503505	0.494445	0.364789	0.647762
			S20	0.746617	0.615611	0.576721	0.633953	0.633288	0.722771	0.877268
			S21	0.14526	0.344036	0.124922	0.218785	0.0886038	0.159775	0.156415
			S22	0.364449	0.538734	0.379815	0.511342	0.492137	0.500379	0.661306
			S23	0.193628	0.237725	0.283974	0.29585	0.37631	0.364458	0.393676
			S24	0.228974	0.181967	0.23428	0.25199	0.233001	0.202204	0.321714
M2	R01	D5	S1	0.323686	0.304052	0.361378	0.29541	0.302126	0.798555	0.855431
			S2	0.503435	0.537858	0.523209	0.584047	0.637159	0.556207	0.637174
			S3	0.367551	0.340791	0.348905	0.305628	0.389466	0.332503	0.458151
			S4	0.742004	0.762345	0.818282	0.827555	1.46986	0.793354	0.912585
			S5	0.73644	0.628847	0.551124	0.773998	0.631183	1.07351	0.983025
			S6	0.824191	0.826232	0.784605	0.854036	0.837986	1.04608	1.22519
			S7	0.535549	0.369745	0.726323	0.461786	0.702816	0.504445	1.073
			S8	0.595196	0.863872	1.01113	1.42556	0.881888	0.571577	1.22363
			S9	0.125861	0.226984	0.50833	0.436651	0.595636	0.397645	0.556334
			S10	0.201893	0.209026	0.383733	0.445727	0.406707	0.249626	0.508176
			S11	1.10193	0.914133	1.17964	0.812434	1.43257	1.17627	1.93458
			S12	0.125109	0.32761	0.247515	0.262535	0.419068	0.156166	0.576354
			S13	0.416376	0.739838	0.544895	0.59524	0.612976	0.717763	0.787516
			S14	0.395793	0.379534	0.297881	0.394345	0.517584	0.542196	0.653688
			S15	0.359057	0.381143	0.497538	0.374384	0.599132	0.513357	0.372894
			S16	1.02978	0.674624	0.86298	0.950784	0.796425	1.06947	1.79745
			S17	0.532416	0.583955	0.342048	0.57413	0.727827	0.740944	0.799403
			S18	0.799544	0.893667	0.944923	0.606617	1.93708	1.33869	1.51142
			S19	0.321898	0.247307	0.621092	0.601984	0.836722	0.780122	0.871847
			S20	0.546282	0.285685	0.415917	0.594333	0.24904	0.32712	0.665174
			S21	0.597393	1.28447	0.869239	0.908979	0.778937	0.988308	1.32426
			S22	0.896721	0.570842	0.848644	0.547707	1.01432	1.49817	1.32951
			S23	0.873386	0.940105	1.7045	1.12913	1.148	1.23962	1.61001
M2	R02	D1	S1	0.39883	0.448844	1.48254	0.77891	0.709933	0.751917	1.61244
			S2	1.38418	0.948981	0.553309	0.852202	1.28817	0.893157	2.50194
			S3	0.379325	0.339131	0.241791	0.275245	0.220135	0.164327	0.55069
			S4	0.622737	0.357366	0.410275	0.379705	0.479051	0.429222	0.531747
			S5	1.1848	0.88797	0.556092	0.542476	0.802851	0.699703	1.14878
			S6	0.666585	0.434384	0.494398	0.393641	0.40724	0.533691	0.686397
			S7	0.497995	0.604769	0.714208	0.566355	0.657616	0.48432	0.750613
			S8	0.644027	0.489311	0.587013	0.547028	0.691868	0.838306	0.870248
			S9	0.448526	0.305185	0.365686	0.305339	0.317362	0.379723	0.533605
			S10	1.5876	0.637424	0.668229	0.624192	0.676598	0.636671	1.18541
			S11	0.815795	0.396241	0.544865	0.533062	0.411541	0.44656	0.610722
			S12	1.15999	0.61738	0.52022	0.481508	0.772628	0.507013	1.06035
			S13	0.425514	0.312396	0.324369	0.242867	0.305781	0.364681	0.498172
			S14	0.807515	0.459827	0.386681	0.662018	0.47163	0.510295	0.840075
			S15	2.16747	0.920476	0.915998	0.646695	0.76155	0.788481	1.14648
			S16	1.51567	0.833137	0.954047	0.678762	0.488832	0.785251	1.51042
M2	R02	D2	S1	1.10601	0.74531	0.637944	0.781792	0.498432		0.896072
			S2	0.323694	0.346536	0.291274	0.208072	0.298263	0.27119	0.582055
			S3	1.35356	0.860256	0.736851	0.842918	0.773444	0.733698	0.563151
			S4	0.329315	0.381821	0.330138	0.354238	0.306609	0.293245	0.382055
			S5	1.61895	0.617054	1.53971	0.81155	1.32981	0.935039	0.842829
			S6	0.699882	0.765457	0.869214	0.580057	0.961456	0.683754	0.723977
			S7	1.5727	1.57285	1.63337	2.0169	1.95561	1.0947	1.46483
			S8	0.257837	0.316044	0.352383	0.255112	0.198367	0.375867	0.514961
			S9	0.628393	0.662808		0.400692	0.467749	0.543804	0.795826
			S10	0.986891	0.800923	0.859774	0.829255	0.948593	0.670779	0.862474
			S11	0.443126	0.900671	0.929208	0.565193	0.855926	0.384897	0.73069
			S12	1.25307	1.23537	1.19656	0.743952	1.02099	1.45714	1.17301
			S13	0.961119	0.666519	0.912429	0.84303	0.717188	0.766668	0.626429
			S14	0.664158	0.352051	0.71879	0.402462	0.313851	0.430536	0.472568
			S15	0.842245	0.544767	0.564553	0.313128	0.396435	0.478967	0.579922
			S16	0.691046	0.588277	0.528928	0.477305	0.505613	0.369881	0.476416
			S17	1.06371	0.40856	0.462436	0.256578	0.406868	0.279299	0.474954
			S18	1.52796	0.762938	0.981036	0.779966	0.810029	0.694538	0.558187
			S19	0.951471		0.545151	0.455031	0.489696	0.422941	0.545509
M2	R02	D3	S1	0.418548	0.432947	0.553157	0.464734	0.522344	0.520891	0.626641
			S2	0.437322	0.503879	0.365923	0.371966	0.285631	0.276778	0.349325
			S3	0.474706	0.42796	0.357937	0.473341	0.405534	0.424051	0.471866
			S4	0.939402	0.783434	0.875173	0.770247	0.681563	0.739344	0.790059
			S5	0.498133	0.293264	0.362983	0.418139	0.382778	0.489342	0.525683
			S6	0.81915	0.685023	0.648445	0.45766	0.622945	0.787056	0.703498
			S7	0.289595	0.273514	0.374196	0.412945	0.338862	0.213158	0.418594
			S8	0.475361	0.439127	0.683267	0.495576	0.496132	0.470427	0.485427
M2	R02	D4	S1	0.324909	0.366168	0.407275	0.285047	0.44693	0.596598	0.667162
			S2	0.974549	0.692449	0.76449	0.490329	0.796647	0.927144	0.750761
			S3	0.809247	0.66409	0.666182	0.318569	1.00913	0.932816	1.14907
			S4	0.525899	0.398947	0.583472	0.249874	0.590698	0.572151	0.847658
			S5	0.819477	0.364423	0.457012		0.457873	0.493384	0.820551
			S6	0.572637	0.372244	0.467984		0.441335	0.582329	0.692424
M2	R02	D5	S1	1.87243	1.9072	1.52206	1.22721	1.30149	1.44197	1.67906
			S2	0.834958	0.580681	0.639078	0.861493	1.15854	1.0433	1.07437
			S3	1.14509	1.43013	1.34966	1.30192	1.16647	0.758004	1.588
			S4	0.717799	0.577359	0.670169	0.60137	0.57803	0.503702	0.728464
			S5	0.510536	0.541132	0.519342	0.426529	0.806819	0.838262	0.587106
			S6	0.852181	0.426068	0.492781	0.403334	0.705857	0.493468	1.2487
			S7	1.10543	1.0841	0.914165	0.674166	0.849063	0.830954	1.07733
			S8	0.677997	0.72852	0.907524	1.20995	2.13961	1.13605	1.48972
M3	R01	D1	S1	0.522886	0.589663	0.495834	0.656573	0.579375	0.663275	0.625174
			S2	0.603783	1.07441	1.00864	0.879467	0.64392	0.924743	0.779394
			S3	0.569325	0.531891	0.605437	0.48343	0.541624	0.865211	0.747692
			S4	0.954669	0.760065	2.13725	1.05167	1.07793	0.889075	1.79675
			S5	0.319387	0.312799	0.594886	0.450586	0.525631	0.61973	0.585102
			S6	0.137734	0.176412	0.38794	0.234589	0.178525	0.216702	0.241077
			S7	0.536334	0.490417	0.651945	0.642569	0.527593	0.546266	0.508979
			S8	0.780147	0.713703	0.69826	1.65991	0.473625	0.606322	0.782811
			S9	0.133081	0.257944	0.284709	0.759618	0.136504	0.28612	0.482763
			S10	0.709122	1.01049	0.973078	1.21206	0.762483	0.885265	1.11238
			S11	0.342472	0.184272	0.204035	0.224485	0.234088	0.207952	0.330196
			S12	0.374785	0.305947	0.268039	0.417685	0.462383	0.265988	0.342581
			S13	0.188421	0.239422		0.294935	0.281325	0.249686	0.326153
			S14	0.293142	0.28836	0.231994	0.384791	0.32442	0.385132	0.25996
			S15	0.232955	0.268899	0.406059	0.334453	0.297197	0.133445	0.451425
			S16	0.861763	0.698222	0.710983	0.670509	0.584647	0.651657	0.683508
			S17	0.920012	0.735536	1.20902	1.09645	1.09257	0.994507	0.936125
			S18	0.127524	0.064379	0.175709	0.129762	0.138192	0.13363	0.13907
M3	R01	D2	S1	0.399124	0.954948	0.954827	0.881033	1.47955	0.741668	0.91991
			S2	0.220077	0.380393	0.33391	0.411074	0.31757	0.781476	0.530929
			S3	0.172093	0.231287	0.268845	0.234537	0.280077	0.18996	0.282925
			S4	0.278577	0.385483	0.199228	0.160072	0.171194	0.34245	0.341042
			S5	0.318086	0.71064	0.524424	0.999516	0.715079	0.799754	1.07955
			S6	0.136335	0.266127	0.138046	0.329394	0.282009	0.428096	0.288408
			S7	0.276033	0.129958	0.344046	0.446476	1.03088	0.188422	0.253426
			S8	1.45395	1.45745	0.80489	1.49883	0.515432	1.06863	0.798003
			S9	0.235558	0.192595	0.254883	0.082091	0.335191	0.149127	0.215935
			S10	1.35956	1.62582	1.55246	1.11889	1.28989	1.99048	2.43865
			S11	0.119331	0.265051	0.173863	0.27659	0.273759	0.278959	0.300496
			S12	0.866769	0.578583	0.787408	0.400226	0.485	0.934521	0.811594
			S13	0.19189	0.368534	0.295797	0.147722	0.389166	0.254659	0.32874
			S14	0.158875	0.271155	0.277745	0.148973	0.225451	0.344614	0.787034
			S15	0.250955	0.301456	0.304695	0.147522	0.268306	0.260614	0.267698
			S16	0.367991	0.308113	0.198543	0.170584	0.319188	0.211115	0.228291
M3	R01	D3	S1	0.288261	0.2516	0.21292	0.349898	0.251794	0.395243	0.47617
			S2	2.18645	2.05792	2.13506	2.7525	1.73943	2.10921	2.8808
			S3	0.633427	0.699855	0.906233	0.395053	0.483149		1.00948
M3	R02	D1	S1	0.764126	0.983329	0.889558	1.43704	0.968613	1.91387	1.51103
			S2	1.25789	1.71712	1.65875	1.35104	0.910521	1.14649	1.50185
			S3	0.159846	0.190895	0.188256	0.157456	0.136236	0.236107	0.425225
			S4	0.244922	0.579386	0.554083	0.659525	0.563754	0.514044	0.802639
			S5	1.82483	1.76006	2.73617	1.40231	1.46734	1.59512	1.89421
			S6	0.35287	0.369997	0.346245	0.457698	0.281036	0.266353	0.624876
			S7	0.147869	0.306677	0.152239	0.191133	0.145413	0.1162	0.296321
			S8	0.696962	0.488483	1.01395	0.550416	0.41912	0.98222	1.03528
			S9	0.346194	0.318309	0.424617	0.480528	0.346995	0.472722	0.351566
			S10	0.264709	0.238808	0.14246	0.330397	0.313742	0.448753	0.829146
			S11	0.617451	0.446698	0.60497	0.640875	0.593006	1.25646	1.21285
M3	R02	D2	S1	0.833116	0.974432	1.07662	1.06465	1.23399	0.774213	1.07911
			S2	0.182844	0.163799	0.601105	0.235053	0.500548	0.283234	0.417265
			S3	0.498596	0.37732	0.23691	0.383566	0.60214	0.50466	0.479575
			S4	0.656382	0.784036	1.19473	0.845243	1.07124	1.50359	1.35519
			S5	0.664368	1.02512	0.722465	0.918469	0.92706	0.430891	0.878384
			S6	0.402622	0.375512	0.358887	0.539256	0.563294	0.740588	0.631532
			S7	0.211845	0.193206	0.129255	0.158574	0.307465	0.203196	0.378294
			S8	0.468332	0.320604	0.143454	0.474934	0.578891	0.513734	0.651303
			S9	0.354994	0.337593	0.369743	0.354518	0.29014	0.439799	0.443213
			S10	0.337202	0.611436	0.521585	0.55556	0.48279	0.516019	0.671758
M3	R02	D3	S1	0.194651	0.292591	0.41248	0.556173	0.377393	0.335293	0.611513
			S2	0.246669	0.129354	0.305463	0.261379	0.270223	0.201009	0.272874
			S3	0.244025	0.182677	0.216753	0.176244	0.225494	0.204605	0.1971
			S4	0.77961		0.875233	0.929573	0.765303	0.857644	1.08879
			S5	0.463441		0.423463	0.398807	0.508559	0.409881	0.449801
			S6	0.3742	0.217948	0.137306	0.10817	0.148855	0.154485	0.225682
			S7	0.360785	0.172151	0.137675	0.160736	0.11576	0.176609	0.285903
			S8	0.170933	0.157937	0.230584	0.202716	0.133274	0.244344	0.233069
			S9	0.158878	0.115772	0.116106	0.176439	0.100894	0.0811779	0.130911
			S10	0.221388		0.225607	0.191967	0.149318	0.158665	0.252239
			S11	0.370832	0.241527	0.241409	0.343222	0.283666	0.261798	0.385857
M4	R01	D1	S1	0.476498	0.450448	0.4018	0.970804	1.27574	0.703198	0.468961
			S2	0.166389	0.238287	0.0627456	0.230391	0.294709	0.303092	0.121651
			S3	0.437684	0.185202	0.360545	0.136783		0.186008	0.34966
			S4	0.654034	0.994934	1.00545	0.71176	0.693913	1.52621	0.956569
			S5	0.785145	0.528996	0.628953	0.534967	0.8701	0.429452	0.939813
			S6	0.212929	0.218744	0.204062	0.126971	0.248895	0.296003	0.431535
			S7	0.184133	0.142155	0.374269	0.06516	0.403296	0.189953	0.330401
			S8	0.157664	0.0851593	0.103057	0.192566	0.556777	0.20353	0.410676
			S9	0.295142	0.227419	0.235858	0.119763	0.585958	0.367857	0.235548
			S10	0.373205	0.0597287	0.398414	0.0808628	0.460813	0.191081	0.265347
			S11	0.350498	0.49141	0.290666	0.439894	0.488421	0.403027	0.440831
			S12	0.517137	0.460485	0.197374	0.552058	0.61966	0.406271	0.263218
			S13	0.571602	0.162399	0.0583097	0.161134	0.534905	0.313087	0.304062
			S14	0.126884	0.343972	0.347149	0.286833	0.744962	0.320323	0.324388
			S15	0.317524	0.136291	0.241222	0.0548647	0.207962	0.236475	0.328081
M4	R01	D2	S1	0.312015	0.273079	0.270934	0.144019	0.867657	0.659406	0.573419
			S2	0.530373	0.41942	0.502567	0.378096	0.313858	0.379354	0.339596
			S3	0.305886	0.350007	0.215552	0.264672	0.409292	0.305197	0.255612
			S4	0.5382	0.677706	0.584149	0.633758	0.826991	0.523031	0.473839
			S5	0.527322	0.356448	0.264944	0.201562	0.619562	0.165536	0.332064
			S6	0.793545	0.377722	0.853752	0.712477	0.735934	0.908223	0.712438
M4	R02	D1	S1	0.606958	0.700065	0.876797	0.492787	0.9345		1.1142
			S2	0.654718	0.356836	0.701399	0.60324	0.635505	0.638804	0.484562
			S3	0.248339	0.242303	0.307495	0.269658	0.349687		0.206253
			S4	0.347152	0.139289	0.280565	0.220469	0.419719		0.332639
			S5	0.719514	0.584835	0.664123	0.406424	0.989698		0.456407
			S6	0.655688	0.335539	0.310043	0.390786	1.00189		0.500334
			S7	0.315259	0.190696	0.238963	0.153911	0.380972		0.263116
			S8	0.424696	0.543731	0.764912	0.525095	0.991909		0.88031
			S9	0.722105	0.359958	1.02868	0.592027	0.193329		0.829901
			S10	1.36281	0.962173	0.970936	1.40445	1.2042		2.01915
M4	R03	D1	S1	0.463277	0.280117	0.262207	0.396752	0.610764	0.663508	0.825785
			S2	0.687549	0.527895	0.772301	0.456495	0.407425	0.391898	0.526583
			S3	0.352098	0.203346	0.274123	0.344318	0.373405	0.263189	0.199899
			S4	0.663736	0.810408	0.686374	1.04248	0.906436	0.706527	0.91437
			S5	0.263904	0.186633	0.407652	0.221157	0.222185	0.199786	0.687802
			S6	0.568458	0.321934	0.586613	0.417882	0.609779	0.515207	0.538343
M5	R01	D1	S1	0.348809	0.36035	0.239063	0.550917	0.254217	0.241505	0.250748
			S2	0.366323	0.42032	0.244911	0.292076	0.2279	0.164043	0.458644
			S3	0.335302	0.415153	0.341291	0.605795	0.355065	0.470332	0.522141
			S4	0.123913	0.169322		0.243307	0.229489	0.5055	0.251114
			S5	0.22941	0.173151	0.30465	0.22209	0.140249	0.169607	0.30406
			S6	0.449125	0.398253	0.717284	0.446342	0.474243	0.412086	0.483937
			S7	0.200728	0.204288	0.327338	0.177462	0.197644	0.313257	0.273871
			S8	0.43426	0.189578	0.270743	0.29939	0.1231	0.331034	0.226619
			S9	0.183281	0.133708	0.183594	0.303071	0.271248	0.289368	0.231626
			S10	0.206376	0.123136	0.282503	0.13609	0.139509	0.0843192	0.242887
			S11	0.414977	0.302592	0.314716	0.1599	0.311703	0.534734	0.261928
			S12	0.26536	0.240676	0.278457	0.303455	0.356223	0.677182	0.312313
			S13	0.348458	0.329716	0.38648	0.219953	0.267443	0.37177	0.381561
			S14	0.658365	0.712749	0.574353	0.555282	0.751026	0.655846	0.591086
			S15	0.518648	0.597365	0.608385	0.696083	0.816595	0.54563	0.375303
			S16	0.365947	0.301338	0.46471	0.418049	0.181321	0.318372	0.452317
			S17	0.915723	0.759296	1.46065	1.07586	0.541695	0.642833	0.936664
			S18	0.515705	0.446941	0.485965	0.519185	0.290885	0.377879	0.494515
			S19	0.475376	0.582088	0.633247	1.29936	0.988017	0.719154	0.777043
			S20	0.299272	0.465856	0.281313	0.340547	0.37966	0.356675	0.365116
			S21	0.520706	0.401587	0.656777	0.443375	0.53708	0.59268	0.692322
			S22	0.78458	1.26702	1.60314	1.15459	0.911315	1.18786	1.92571
M5	R01	D2	S1	0.314238	0.653465	0.504956	0.315678	0.312331	0.338556	0.292059
			S2	0.424764	0.902648	0.528414	0.468227	0.585209	0.397534	0.504322
			S3	0.195468	0.300887	0.260855	0.186537	0.281377	0.102838	0.214637
			S4	0.379117	0.33809	0.513135	0.252435	0.539637	0.211806	0.280304
			S5	0.69487	0.58637	0.387765	0.390415	0.297114	0.315248	0.524952
			S6	0.552145	0.301718	0.416312	0.445349	0.580487	0.376445	0.501496
M5	R01	D3	S1	0.256612	0.191528	0.354489	0.259869	0.164014	0.178398	0.320296
			S2	0.176112	0.258233	0.281911	0.300458	0.22806	0.357929	0.200867
			S3	0.173097	0.213044	0.360389	0.321016	0.240608	0.218439	0.3165
			S4	0.366898	0.254512	0.471517	0.466871	0.413528	0.205185	0.73854
			S5	0.190113	0.236167	0.534616	0.327687	0.302261	0.238123	0.243847
			S6	0.12763	0.160416	0.388209	0.303364	0.183636	0.169547	0.181656
			S7	0.366358	0.208856	0.403778	0.352117	0.300636	0.326522	0.427447
			S8	0.161449	0.129264	0.378301	0.240168	0.110315	0.161026	0.33264
			S9	0.245523	0.177417	0.554391	0.107746	0.300016	0.377827	0.433842
			S10	0.327161	0.253082	0.399859	0.299436	0.324966	0.407125	0.574945
			S11	0.155551	0.100788	0.188511	0.0961548	0.0861342	0.145579	0.171785
M6	R01	D1	S1	0.223202	0.215247	0.119198	0.262761	0.134839	0.130803	0.172309
			S2	0.330139	0.344125	0.337138	0.270402	0.247593	0.318284	0.374202
			S3	0.530693	0.473225	0.516528	0.297467	0.318304	0.574332	0.513611
			S4	0.355221	0.531515	0.660709	0.309702	0.373531	0.620919	0.541771
			S5	0.57628	0.582436	0.685891	0.424671	0.576345	0.571342	0.617493
			S6	0.154331	0.148796	0.17314	0.139988	0.152982	0.124599	0.187071
			S7	0.229456	0.225548	0.181072	0.0690236	0.167912	0.165601	0.104112
			S8	0.201468	0.270125	0.360633	0.309802	0.128246	0.232545	0.302197
			S9	0.101552	0.141653	0.31033	0.110545	0.0990249	0.159692	0.170588
			S10	0.219764	0.235011	0.345431	0.145961	0.195019	0.145082	0.177001
			S11	0.258675	0.241021	0.179451	0.111276	0.188227	0.1848	0.184888
			S12	0.107269	0.241481	0.192374	0.104725	0.0806075	0.175043	0.245091
			S13	0.539584	0.57349	0.427938	0.265746	0.280982	0.631313	0.460881
			S14	0.579016	0.538298	0.498965	0.319184	0.315627	0.48943	0.403725
			S15	1.00937	1.14313	0.733513	0.716585	0.66709	0.794379	0.738276
			S16	1.23147	1.28432	1.01699	0.768021	0.447117	0.914227	1.24019
			S17	0.833233	1.25359	0.476188	0.285735	0.318078	0.399881	1.09553
			S18	0.429382	0.487536	0.260502	0.24716	0.20455	0.207643	0.348275
			S19	0.263063	0.411643	0.159757	0.158097	0.178395	0.493058	0.317573
			S20	0.872592	0.748122	0.504151	0.431484	0.509637	0.494604	0.645835
			S21	0.182409	0.27517	0.326932	0.234586	0.143447	0.347804	0.22923
			S22	0.19931	0.198602	0.238458	0.181257	0.147499	0.278384	0.230662
			S23	0.62786	0.651508	0.579626	0.629562	0.386143	0.693614	0.528885
			S24	0.369168	0.250764	0.447194	0.368922	0.290504	0.290675	0.30217
			S25	0.309243	0.380332	0.295766	0.321162	0.216525	0.294882	0.370922
			S26	0.35787	0.257547	0.286682	0.207492	0.275542	0.274529	0.302748
			S27	0.39637	0.376253	0.300009	0.26416	0.281164	0.476803	0.492014
			S28	0.451121	0.38703	0.389601	0.343181	0.401694	0.797534	0.574288
			S29	0.665881	0.481998	0.472541	0.405674	0.474441	0.42035	0.550271
			S30	0.280407	0.29445	0.301701	0.262592	0.196163	0.290743	0.243006
			S31	0.268828	0.379612	0.340909	0.275592	0.47084	0.304366	0.257913
			S32	0.233226	0.273206	0.239354	0.139857	0.217691	0.16158	0.275402
			S33	0.246702	0.243462	0.243252	0.109173	0.201191	0.175507	0.263291
			S34	0.736264	0.465047	0.41158	0.375866	0.373883	0.552316	0.480675
			S35	0.998282	0.61688	0.431887	0.329798	0.389794	0.775457	0.851546
M6	R01	D2	S1	0.178241	0.216042	0.130523	0.198906	0.217668	0.226565	0.188053
			S2	0.192627	0.221543	0.24946	0.159573	0.324457	0.203289	0.29657
			S3	0.605983	0.479044	0.547665	0.293985	0.429507	0.460786	0.822447
			S4	0.292141	0.228307	0.23434	0.163703	0.190769	0.120296	0.330433
			S5	0.254109	0.236215	0.181584	0.284488	0.169051	0.192101	0.160122
			S6	0.357952	0.480783	0.252808	0.325886	0.337023	0.355408	0.425187
			S7	0.150614	0.175529	0.181318	0.214083	0.20706	0.139425	0.224367
			S8	0.715889	0.507187	0.715214	0.408786	0.63892	0.739414	0.797243
M6	R01	D3	S1	0.241738	0.288113	0.400338	0.121326	0.157708	0.175288	0.174494
			S2	0.457193	0.509257	0.481314	0.376169	0.421462	0.549132	0.435382
			S3	0.683616	0.494792	0.525955	0.621651	0.788954	0.679273	0.708346
			S4	0.259786	0.356128	0.311611	0.185333	0.250319	0.180343	0.224544
			S5	0.826283	0.827528	0.805622	0.632934	0.751776	0.709645	0.687704
			S6	0.871007	0.695198	0.764292	0.528533	0.721528	0.512702	0.697092
			S7	0.646762	0.678663	0.501813	0.497068	0.597289	0.540541	0.448561
			S8	0.260065	0.22063	0.129163	0.187807	0.210566	0.158382	0.15587
			S9	0.0826575	0.239962	0.204962	0.104639	0.172721	0.193107	0.144348
			S10	0.128899	0.17173	0.238064	0.217508	0.366362	0.253771	0.180784
			S11	0.671612	0.531064	0.980753	0.474767	0.814616	0.578175	0.62495
			S12	0.159593	0.144733	0.262342	0.078316	0.390254	0.19569	0.184859
			S13	0.325928	0.248412	0.209572	0.164725	0.259665	0.16445	0.17649
			S14	0.364763	0.370328	0.364106	0.229417	0.197297	0.383091	0.200124
M6	R01	D4	S1	0.729131	0.761598	0.976314	0.785704	0.648283	0.87153	1.31196
			S2	0.722735	0.926369	1.0415	1.11006	0.707025	0.934167	0.899311
			S3	0.690666	1.19746	1.35284	0.897302	1.11182	0.929845	0.977379
			S4	0.855448	0.760282	0.880661	0.564983	0.729907	0.556509	0.793419
			S5	0.399968	0.210476	0.249797	0.433861	0.330153	0.182053	0.293008
			S6	0.747267	0.721229	0.644764	0.743951	0.665567	0.68622	0.759351
			S7	0.98392	1.32472	1.41743	0.989794	1.21134	1.04282	1.4903
			S8	0.242026	0.247969	0.451194	0.25105	0.195991	0.224569	0.445117
			S9	0.264555	0.309262	0.307926	0.369333	0.183903	0.155957	0.443264
			S10	0.196783	0.264176	0.704767	0.371693	0.378329	0.293605	0.474929
			S11	0.252878	0.250989	0.221536	0.234344	0.412096	0.218774	0.288487
M6	R02	D1	S1	0.871283	1.10265	0.84944	0.918273	0.860251	0.754517	0.717687
			S2	1.07158	0.809464	0.739956	0.707492	0.660798	0.869698	0.779395
			S3	0.563962	0.527879	0.487138	0.475356	0.668127	0.720375	0.32481
			S4	0.342648	0.363662	0.41939	0.510231	0.392496	0.299461	0.389439
			S5	2.29524	2.14208	2.4716	1.54572	2.48223	2.15905	2.71762
			S6	0.675444	0.457361	0.613214	0.743249	0.275359	0.261178	0.47742
			S7	1.20381	0.926412	0.830391	0.72127	1.15304	1.09181	1.0206
			S8	0.689443	0.609699	1.0135	0.532144	0.767017	0.708338	0.721397
			S9	0.738401	0.524551	0.84709	1.17034	1.16208	0.695992	0.788723
			S10	0.736584	0.446234	0.366165	0.772166	0.497431	0.665694	0.670514
			S11	0.325678	0.253327	0.266937	0.431517	0.263847	0.186644	0.273717
			S12	0.487338	0.294861	0.423828	0.807915	0.563785	0.773561	0.291128
			S13	0.188492	0.426501	0.237596	0.309229	0.336872	0.261588	0.516655
			S14	1.49406	1.38604	1.68822	1.26256	1.25917	1.78335	1.71509
			S15	0.505881	0.443001	0.456009	0.509562	0.547136	0.477509	0.40343
			S16	0.611472	0.572831	0.645196	0.712512	0.551352	0.499832	0.772445
			S17	1.14474	1.35742	1.79982	0.659764	1.51822	0.965969	2.18266
			S18	0.879088	0.72552	0.903129	0.512351	0.639324	0.902677	0.778362
			S19	0.450675	0.471206	0.403833	0.502935	0.775636	1.05358	0.765468
			S20	0.523734	0.760376	0.942637	0.650284	0.901466	1.30258	0.949287
M6	R02	D2	S1	0.723515	0.814229	0.809851	0.806862	0.839639	0.514547	0.611218
			S2	0.25072	0.415061	0.308563	0.529159	0.476401	0.308695	0.568126
			S3	0.822456	0.564889	0.628857	0.444782	0.708584	0.669063	0.442658
			S4	0.0591774	0.198563	0.280922	0.126938	0.0887781	0.185199	0.201648
			S5	0.217128	0.120486	0.146964	0.148906	0.203921	0.112569	0.108999
			S6	2.12995	1.52158	1.58355	0.999189	1.13373	1.13358	1.32899
			S7	0.546239	0.485272	0.339249	0.357532	0.415543	0.355082	0.272093
M6	R02	D3	S1	0.523535	0.269629	0.261058	0.358139	0.540281	0.605743	0.266309
			S2	0.379247	0.523317	0.664357	0.344076	0.973771	0.310846	0.752064
			S3	0.417479	0.891154	0.813554	0.323575	0.542564	0.617374	0.491035
			S4	0.705921	0.79726	0.973834	0.530683	0.543831	0.760442	0.433375
			S5	0.53966	0.687406	0.529372	0.928558	1.42227	0.756501	0.527554
			S6	0.863604	0.866648	1.4284	0.753441	1.63748	0.840215	0.837201
			S7	1.41606	0.964643	0.777152	0.821537	0.545835	0.520214	0.787747
			S8	1.36594	1.14302	1.22841	1.09721	1.55749	1.24544	1.6555
			S9	0.348529	0.617748	0.640714	0.400187	0.615432	0.619013	0.382505
			S10	0.345186	0.681649	0.9489	0.505215	0.674278	0.412976	0.385798
			S11	0.301452	0.551444	0.529298	0.475671	0.289001	0.262601	0.450168
M6	R02	D4	S1	0.414654	0.216685	0.289227	0.359565	0.366937	0.698734	0.444855
			S2	1.95122	2.29691	1.31987	1.6525	1.87798	1.92524	1.93816
			S3	0.585597	0.50516	0.830622	0.453889	0.515769	0.902519	0.561142
			S4	0.242544	0.335431	0.420092	0.41735	0.364019	0.132505	0.13957
			S5	0.361644	0.49023	0.569597	0.406328	0.592865	0.503736	0.186143
			S6	0.474632	0.401965	0.382782	0.394492	0.419767	0.48642	0.316129
			S7	0.503557	0.311287	0.220598	0.137133	0.492399	0.307525	0.313175
			S8	0.658868	0.644442	0.22055	0.201425	0.388799	0.236283	0.19824
			S9	0.52115	0.644939	0.737293	0.596138	0.590212	1.06956	0.532514
			S10	0.535487	0.250905	0.369367	0.326241	0.381506	0.33173	0.43795
			S11	0.636893	0.502406	0.574215	0.385433	0.368842	0.645441	0.388763
			S12	0.960104	0.636663	0.785754	0.47916	0.397304	0.519443	0.55391
			S13	0.536429	0.326868	0.492756	0.33267	0.292903	0.500086	0.26429
M6	R03	D1	S1	0.576266	0.464971	0.544302	0.554961	0.488698	0.654455	0.605574
			S2	0.26586	0.283989	0.145736	0.276957	0.214651	0.195903	0.200741
			S3	0.290282	0.305767	0.23589	0.232536	0.272011	0.391144	0.321293
			S4	1.32592	1.08952	1.28106	0.593393	0.926552	1.07237	1.45102
			S5	0.177701	0.169146	0.300208	0.165984	0.142882	0.238738	0.20267
			S6	0.506276	0.670024	0.501383	0.320374	0.346589	0.456786	0.42491
			S7	0.336864	0.271211	0.455583	0.186383	0.179069	0.28244	0.213163
			S8	0.551308	0.827021	0.871898	0.600898	0.722851	0.719015	0.591852
			S9	0.537511	0.694074	0.587059	0.369211	0.480042	0.4685	0.41173
			S10	0.740049	0.847682	0.730706	0.590642	0.468514	0.711242	0.812027
			S11	0.657068	0.702975	0.670171	0.612549	0.483565	0.686807	0.810544
			S12	0.585	0.478899	0.518987	0.330429	0.346131	0.58671	0.728868
			S13	0.46277	0.697993	0.603618	0.52659	0.470614	0.738086	0.567035
			S14	1.02305	0.85717	1.00179	0.526568	0.45687	0.68206	0.503601
			S15	0.368032	0.660629	0.569386	0.536749	0.422388	0.465382	0.380377
			S16	0.384314	0.537639	0.382175	0.285616	0.436846	0.45728	0.424129
			S17	0.550546	0.468419	0.518336	0.442517	0.381144	0.506957	0.397387
			S18	0.261196	0.308969	0.400602	0.162744	0.219813	0.353569	0.190424
			S19	0.230432	0.193547	0.333271	0.197494	0.201558	0.205218	0.283136
			S20	0.19097	0.232134	0.331646	0.291828	0.271081	0.207181	0.148023
			S21	0.402181	0.345079	0.423069	0.263438	0.271964	0.285672	0.31174
			S22	0.499014	0.389961	0.638754	0.364048	0.304956	0.342493	0.37775
			S23	0.675135	0.635496	0.42499	0.749916	0.408392	0.713559	0.505659
			S24	0.476483	0.351743	0.445441	0.27752	0.373431	0.504977	0.305261
			S25	0.317478	0.278972	0.299125	0.293816	0.329023	0.195305	0.530048
			S26	0.192507	0.307086	0.258192	0.13504	0.144649	0.188886	0.198149
			S27	0.700896	0.813687	0.695583	1.20226	0.5246	0.766603	0.780493
			S28	0.103604	0.148834	0.187264	0.0428632	0.0350221	0.091501	0.0960341
			S29	0.288241	0.215724	0.224773	0.178793	0.121484	0.161193	0.0971524
			S30	0.725796	0.306902	0.594466	0.334776	0.427492	0.48023	0.186519
M6	R03	D2	S1	0.981082	1.37342	1.4564	0.989636	1.36837	1.20006	0.683736
			S2	1.38206	1.71888	2.318	1.52445	1.56995	2.16185	1.81983
			S3	0.948261	0.840575	1.50683	0.958469	0.57486	1.5642	1.36658
			S4	0.596052	1.28054	0.842495	1.08552	1.1957	2.62246	0.811103
			S5	0.789442	1.09313	1.26943	1.02827	0.88164	1.95314	0.94981
			S6	1.21839	0.941975	1.19516	0.850075	1.25787	1.32306	1.74891
			S7	0.657915	0.633078	0.69746	0.609928	0.608796	1.02377	0.828079
			S8	0.620615	0.640415	0.615588	0.596819	0.514324	0.370472	0.736302
			S9	0.326675	0.495037	0.356791	0.711443	0.381129	0.557892	0.333123
			S10	1.1664	1.33946	1.19876	1.50619	1.13632	2.1408	1.00532
			S11	0.720952	0.778315	0.683978	0.549736	0.636127	1.57009	0.657932
			S12	0.530152	0.629499	0.674285	0.366803	0.388013	0.476578	0.694765
			S13	0.613085	0.597652	1.13691	0.499631	0.500467	0.683571	0.490737
			S14	1.13921	0.764191	1.227	0.685651	1.04622	1.01564	1.30096
			S15	1.00439	0.731501	1.18359	0.686808	0.877959	1.16048	1.09687
			S16	0.648162	0.6691	0.565023	0.414849	0.435931	0.806723	0.657384
			S17	0.845171	1.07604	0.806959	0.639019	0.523268	0.757245	0.841035
			S18	0.688393	0.737029	0.708182	0.561774	0.330857	0.404253	0.453266
			S19	0.714414	0.671803	0.515165	0.308713	0.452672	0.632501	0.481337
			S20	2.30368	1.5853	1.47729	1.65273	1.74655	2.13404	1.71807
M6	R03	D3	S1	0.420355	0.732964	0.817507	0.467136	0.372018	0.454713	0.62497
			S2	1.26058	0.951174	0.703004	0.522218	0.469093	0.503427	0.662839
			S3	0.456992	0.446975	0.767155	0.337494	0.398927	0.489364	0.719064
			S4	0.308542	0.224178	0.400844	0.268352	0.322336	0.258135	0.373175
			S5	0.281509	0.241436	0.209781	0.1157	0.10088	0.187407	0.132305
			S6	0.385216	0.264587	0.383142	0.205816	0.215153	0.307339	0.340658
			S7	0.289157	0.266941	0.201613	0.0953998	0.231253	0.238561	0.205203
			S8	0.229852	0.315744	0.118084	0.128334	0.158919	0.211329	0.190436
			S9	0.830537	0.945815	0.85145	0.712786	0.522939	0.720857	0.653039
			S10	0.491729	0.69164	0.396316	0.346885	0.400643	0.463308	0.58019
			S11	0.742569	0.600257	0.714506	0.50572	0.488053	0.497018	0.498843
			S12	0.361488	0.513884	0.321936	0.197524	0.211875	0.246833	0.247734
			S13	0.569678	0.632813	0.602225	0.545539	0.327819	0.466903	0.277362
			S14	0.736779	0.673115	0.865786	0.604671	0.629817	0.80065	0.713732
			S15	0.556201	0.430922	0.458682	0.31129	0.300198	0.334994	0.438346
			S16	0.415531	0.774228	0.485015	0.279945	0.165711	0.167467	0.257197
			S17	0.442765	0.346389	0.257783	0.292975	0.241459	0.354282	0.286691
			S18	0.637325	0.640922	0.335103	0.328823	0.396419	0.369047	0.430369
			S19	1.33215	1.47167	0.831033	0.809992	0.772531	1.32072	1.17292
			S20	0.45927	0.333523	0.346218	0.199789	0.164582	0.190331	0.445249
			S21	0.913445	0.536528	0.658211	0.612057	0.495985	0.579322	1.19526
			S22	0.64676	0.695747	0.61715	0.363089	0.342704	0.389036	0.390233
			S23	0.3503	0.526477	0.384945	0.275805	0.270975	0.254727	0.441202
			S24	0.11219	0.205879	0.123806	0.139783	0.122943	0.0919969	0.201793
			S25	0.310589	0.369061	0.247372	0.189309	0.306793	0.215464	0.206458
			S26	0.320188	0.323959	0.333238	0.275044	0.230293	0.190876	0.189193
			S27	0.251956	0.226435	0.23058	0.170533	0.139969	0.175503	0.146052
			S28	0.199913	0.196843	0.216554	0.113864	0.106551	0.200016	0.115692
			S29	0.229689	0.18248	0.281515	0.296775	0.292036	0.252081	0.275003
			S30	0.242239	0.235121	0.579657	0.374465	0.212416	0.309943	0.550647
			S31	0.148041	0.215132	0.49371	0.423441	0.200134	0.126257	0.510384
			S32	0.588595	0.657283	0.624213	0.507383	0.802869	0.56295	0.942691
			S33	0.787979	0.428737	0.587021	0.434613	0.257737	0.25699	0.802124
			S34	0.179378	0.307144	0.18353	0.152948	0.149391	0.219094	0.127704
			S35	0.622928	0.649251	0.608608	0.335123	0.437107	0.483801	0.365259
			S36	0.622293	0.8638	0.596244	0.59497	0.4099	0.623037	0.36029
M6	R03	D4	S1	1.51426	1.41033	1.7142	1.06566	1.05824	1.43721	1.30405
			S2	0.47842	0.444983	0.360289	0.273474	0.2738	0.310804	0.263863
			S3	0.37873	0.393884	0.351177	0.226808	0.196095	0.332059	0.185124
			S4	0.226743	0.409481	0.551262	0.368136	0.314535	0.311711	0.36114
			S5	0.750563	1.11757	0.881781	0.783891	0.799436	0.825239	0.499095
			S6	0.553663	0.736102	0.959935	0.489667	0.384775	0.459522	0.272013
			S7	0.249387	0.484161	0.0856077	0.226244	0.108123	0.160008	0.286833
			S8	0.465598	0.374578	0.309553	0.120236	0.321684	0.208095	0.183209
			S9	0.553779		0.553256	0.229323	0.349773	0.329929	0.208562
			S10	0.536395	0.33471	0.378639	0.33557	0.323582	0.35092	0.268716
			S11	0.252292	0.219086	0.199346	0.197368	0.163031	0.18501	0.193105
M6	R04	D1	S1	0.95951	1.14422	1.42379	0.790298	0.826765	0.869217	1.07862
			S2	1.34882	0.785807	1.31249	0.839959	0.825366	0.874483	1.41367
			S3	0.615136	0.495855	0.632162	0.474406	0.383286	0.386202	1.53114
			S4	1.63947	0.903086	0.993342	1.19661	1.2997	0.933658	0.758714
			S5	0.147309	0.296833	0.357807	0.210821	0.275699	0.203377	0.259623
			S6	1.09366	2.08048	1.14801	1.33539	0.820493	1.19562	2.15559
			S7	0.48987	0.723361	0.761695	0.524216	0.588929	0.48939	0.388386
M6	R04	D2	S1	1.56974	0.899579	1.46942	0.714126	0.852786	1.20863	1.69796
			S2	2.42217	2.61545	2.1385	1.48659	1.56008	2.42816	3.00268
			S3	3.51619	1.26825	3.51197	1.59081	2.29962	2.76337	1.72976
			S4	1.58263	1.37028	1.25772	0.781339	1.26762	1.54216	0.954675
			S5	2.09682	1.76209	1.8023	0.846637	1.2938	1.47835	1.57811
			S6	1.11791	1.03034	1.3523	0.984662	1.26244	1.70434	1.45699
M7	R01	D1	S1	7.3013	8.64274	7.3295	8.43943	7.43892	6.83215	9.47826
			S2	4.58131	4.0446	3.02268	3.69749	3.22394	3.20505	3.50357
			S3	2.80734	2.36717	1.74756	4.04116	2.40439	2.12564	2.19916
			S4	0.835402	1.83023	1.16164	1.25867	1.32733	0.809035	1.20815
			S5	4.22261	3.72111	3.52498	12.2859	2.98624	3.17127	4.0868
			S6	2.20813	2.26972	1.28144	4.85355	1.25559	1.02932	1.33875
			S7	3.80649	3.66765	2.45847	3.09124	4.07965	3.34081	2.53271
			S8	2.58364	2.31581	1.99767	2.00662	3.19031	5.19886	2.66677
			S9	3.66535	4.17208	3.85636	5.9468	4.22247	7.92846	7.85152
			S10	1.92668	4.55072	2.12131	2.25613	4.32484	3.46519	2.61403
M7	R01	D2	S1	2.4598	2.92984	5.53791	2.43319	2.68213	3.22371	2.34185
			S2	1.61189	1.23767	1.89	3.85949	2.09124	1.30611	1.77764
			S3	2.84182	4.0488	4.75011	3.77442	4.56022	3.48682	3.74635
			S4	4.13315	4.64996	3.89399	4.70165	5.3409	5.6765	4.93506
			S5	2.11664	4.88422	4.17814	3.51021	2.62582	4.56691	4.36699
			S6	1.54492	1.93805	1.60437	1.4169	1.13325	1.84208	2.18289
			S7	1.75645	2.46105	2.1085	2.48013	2.15934	2.93202	3.62664
			S8	1.23179	0.738052	1.50849	1.67364	1.20995	0.862333	1.64212
			S9	1.31636	1.60121	1.33933	1.92524	1.20893	0.910923	2.48523
M7	R01	D3	S1	2.83589	2.28216	2.63387	8.01887	6.11041	4.17076	4.60063
			S2	6.07778	7.4115	6.85651	11.7619	8.16083	6.97707	8.52807
			S3	5.10051	3.59973	5.53119	6.43064	4.85999	6.72242	5.28934
			S4	2.69825	3.63361	3.82382	3.49409	3.49642	4.85862	4.97114
			S5	2.83754	4.03118	6.89119	2.25513	8.16272	5.62416	7.84651
			S6	5.91609	5.02254	4.73282	6.11172	5.52956	5.3098	5.39295
			S7	5.73276	7.77506	6.86388	5.80249	6.23755	8.60842	4.7825
			S8	1.42403	2.04878	2.26662	1.60189	2.20977	1.9171	1.71767
			S9	2.18501	1.88776	2.09159	2.69439	0.707397	3.6038	2.8677
M7	R02	D1	S1	1.42743	1.89958	1.22979	3.02795	1.62978	1.65752	2.99001
			S2	2.17138	2.41721	3.31862	1.86577	3.33253	1.63611	3.95633
			S3	2.87182	1.04799	2.33137	0.939212	1.63679	2.88915	2.28717
			S4	1.56198	3.71549	2.43387	2.3905	2.72122	2.08076	6.20276
			S5	6.83393	6.88887	4.7749	4.28623	6.30436	3.64395	8.00173
			S6	2.43562	2.87712	1.74972	1.37426	1.18242	1.42751	1.72137
			S7	2.55221	2.93304	1.4372	2.30858	2.5008	1.78059	1.60103
			S8	5.95376	4.07738	4.02699	5.81717	5.03295	6.32442	5.78684
			S9	5.14022	5.86536	6.25275	7.01321	3.26403	8.15305	8.97793
			S10	5.39958	3.24406	3.71207	4.91274	6.03479	3.69117	7.15251
			S11	4.83416	8.26654	9.98564	7.36064	9.5388	8.3995	14.5494
			S12	7.71544	9.03495	6.96165	5.78716	9.1735	8.77871	13.2764
			S13	14.1112	13.3837	18.9864	16.6999	12.9021	12.4406	11.5449
			S14	9.47479	12.7899	9.12793	7.36685	4.9958	5.49786	7.20898
			S15	10.9077	13.1103	4.46537	12.3371	10.8775	8.76885	18.2987
			S16	3.50089	3.97104	2.42842	1.49722	2.81622	2.01317	2.856
			S17	5.79012	7.76081	4.6876	3.68694	4.37462	4.44826	5.42932
			S18	3.51171	2.98835	2.82812	2.36468	2.85375	2.31489	3.34183
			S19	1.72077	2.7084	1.2019	1.51014	1.2094	1.69063	1.5221
			S20	2.41656	3.46672	1.75872	2.14025	1.83828	2.06769	2.94122
			S21	2.31519	1.28834	1.56536	2.84984	2.60322	2.10397	3.97315
M7	R02	D2	S1	3.35242	4.27989	3.90905	4.13485	4.20436	5.92216	4.5694
			S2	2.62267	3.78064	4.03423	2.67905	5.95227	3.84312	3.90691
			S3	4.33163	3.65268	3.2053	3.26338	2.51763	3.12304	3.58877
			S4	6.93748	4.85475	5.1594	4.30722	5.03184	6.97672	6.45129
			S5	3.21959	2.79736	8.59735	3.44842	2.58669	4.17144	3.76715
			S6	4.39984	3.59011	3.83644	2.11159	3.38624	3.71194	3.18826
			S7	3.26619	2.45067	1.6474	2.79056	1.93598	3.03109	3.03586
			S8	2.90616	2.43932	2.44082	1.89989	3.07703	2.46275	3.69383
			S9	6.53192	4.33591	5.70135	6.37949	6.41105	3.13499	4.44869
			S10	6.00119	5.24049	4.07155	6.99455	3.69442	3.8176	5.86576
			S11	1.58709	3.19245	1.74563	3.16878	1.733	1.68806	2.39789
			S12	6.49207	2.27437	2.64415	2.4894	4.29526	1.88093	3.06947
			S13	4.91826	3.57621	3.10663	6.13398	4.43068	3.48532	2.9636
			S14	5.42218	2.66706	2.7592	2.14399	2.80718	10.2514	3.33512
			S15	7.31153	5.9214	4.77333	5.57848	4.0392	3.49581	11.1239
			S16	9.21477	5.94594	6.72596	5.67802	9.49308	7.60252	12.2711
			S17	3.3823	2.55967	3.64834	2.88145	3.13013	3.20047	4.02234
			S18	8.26545	5.24684	6.76564	11.0226	5.27819	6.40601	5.54272
			S19	2.82361	4.07722	3.10889	2.05028	3.62963	2.86683	4.00101
			S20	5.01946	3.0434	3.28199	3.80518	4.98418	3.99648	6.88401
			S21	3.371	3.93991	4.35447	4.6677	6.09071	3.84353	6.06164
			S22	4.13363	3.58173	2.74267	3.4935	3.83433	4.04621	3.80832
			S23	7.01671	5.71084	3.41034	4.82649	7.12377	5.1583	6.21334
			S24	4.92295	6.10187	5.7492	4.69364	4.37479	4.46234	6.00783
			S25	1.30927	1.93068	1.45448	0.728489	0.889273	2.45709	1.1526
			S26	2.83361	2.16411	1.67523	0.988252	3.04441	1.31809	5.24926
			S27	3.50655	2.31321	2.44565	2.23196	1.98879	3.02236	3.03292
M7	R02	D3	S1	3.03571	4.97146	3.08897	3.65182	3.10339	5.35826	6.07577
			S2	0.734245	0.556083	0.764282	0.863225	1.82362	1.80365	1.19266
			S3	2.12337	6.12914	1.59458	2.41484	2.94206	2.15511	5.96975
			S4	11.1217	8.72996	7.79371	8.56303	8.37676	10.5744	15.9032
			S5	2.06704	2.42573	1.43911	1.1035	1.87955	2.44347	2.08076
			S6	2.60291	3.35076	2.66225	1.61357	3.25812	2.12477	3.33208
			S7	2.90058	2.68477	2.82922	2.58356	4.2202	4.05575	3.08867
			S8	3.73762	6.23592	5.33654	5.16674	3.29477	4.19596	8.07823
			S9	2.47545	4.61197	4.14348	3.24319	10.1088	6.97204	2.92558
			S10	1.18437	0.647893	0.396959	0.419089	0.733839	0.454107	1.7246
			S11	5.05692	3.67232	2.62617	2.83827	3.47274	5.52168	5.52532
M7	R03	D1	S1	2.15705	3.72441	2.94492	2.89612	2.89419	2.92907	8.53356
			S2	1.80349	3.15233	1.81247	3.58433	3.7608	3.15585	5.44262
			S3	7.04247	5.58896	5.13337	5.11684	5.0281	5.77385	8.6729
			S4	3.61227	2.72835	3.15399	1.86549	2.44407	3.40184	4.21789
			S5	4.69687	3.78779	5.21116	3.13358	3.70377	5.60277	7.6187
			S6	4.52179	3.56437	5.60795	2.64209	4.71257	4.41092	4.14998
			S7	9.12498	6.31873	4.91572	5.5477	6.4178	7.05317	7.70756
			S8	4.28814	4.55778	3.24048	4.66017	4.09413	4.49334	5.60113
			S9	1.64765	4.44071	1.65067	1.7275	3.12027	10.7974	4.21591
			S10	4.26038	2.53422	2.42977	2.76539	3.93473	10.3264	3.84091
			S11	3.16433	2.71128	1.72795	1.65175	3.59258	3.80042	5.61229
			S12	5.64816	3.99645	4.65052	3.71595	5.07031	6.83958	5.51312
			S13	2.54027	2.71923	1.55628	2.07497	2.07283	5.40089	2.52258
			S14	3.13847	3.11584	2.17473	2.00031	3.38917	2.98266	2.59651
			S15	12.6053	7.09224	6.43119	8.70622	7.7081	9.4457	11.2501
			S16	4.50111	2.54281	3.16279	2.51717	3.2258	4.10954	4.15199
			S17	3.96348	5.309	3.7731	4.14127	2.10137	1.9599	4.96798
			S18	2.7074	3.08594	2.78925	3.13985	2.00707	2.25061	2.65991
			S19	7.8729	4.85714	3.62436	7.97865	3.01308	3.48394	4.68372
			S20	5.54323	6.93272	3.95017	3.74178	5.19798	13.9725	12.3071
M7	R03	D2	S1	4.42493	4.32692	5.76762	3.54998	2.51507	5.93497	3.81776
			S2	5.25899	4.81096	5.6023	5.72724	4.4324	5.03904	3.62359
			S3	0.817942	1.1886	1.9836	2.35156	1.77121	3.04901	3.42906
			S4	1.72957	2.81808	2.03625	1.52482	1.96658	0.729519	2.00033
			S5	5.26122	4.00092	5.09744	3.25393	4.95558	2.82426	7.87293
			S6	5.67438	2.7016	3.67896	4.52503	6.55654	2.6324	7.0576
			S7	5.40122	4.24482	7.22139	4.58716	4.772	5.46198	6.7521
			S8	3.28241	3.21414	2.15039	2.11766	4.29182	2.74524	3.51853
			S9	3.8419	2.60431	5.40667	3.02881	2.28124	3.27544	3.27089
			S10	2.5494	2.32973	3.71101	4.03222	3.9984	3.52347	3.20638
			S11	9.27813	9.83859	13.6107	8.20892	18.0224	6.7754	12.8694
			S12	6.42205	4.7108	12.7964	3.7822	3.02177	5.75387	3.17028
			S13	3.95504	2.38594	4.91997	4.04431	2.90058	3.92716	3.21353
			S14	2.5441	1.09489	2.25866	1.63326	1.42326	1.28099	3.04882
			S15	7.03962	4.63898	7.18288	6.42415	6.44612	8.28973	6.98157
			S16	1.58115	2.75726	2.65433	2.22395	2.69078	2.68702	1.8462
			S17	3.31753	2.64551	1.61127	1.92826	3.45107	2.6866	3.97164
			S18	3.27529	4.05027	3.0329	2.87672	3.40699	2.10084	2.48226
			S19	10.4693	7.86343	6.28036	5.13357	5.55896	5.7423	8.24327
			S20	6.19315	9.52102	3.50439	4.45267	3.7027	4.02057	2.49799
			S21	6.91079	6.11559	6.6155	7.05042	7.57872	5.456	7.41696
			S22	4.69108	3.29155	2.80283	2.62645	4.11055	3.36765	4.53736
			S23	3.28306	3.49357	3.81601	4.04733	7.14284	4.13511	3.43561
			S24	1.08504	1.78258	1.35097	1.07664	12.6004	0.428762	1.16222
			S25	3.79479	5.78342	2.77448	4.55019	2.14571	2.68707	5.60163
			S26	2.70243	1.26713	2.92469	5.97748	1.33084	4.01773	3.13771
			S27	3.18837	3.92611	3.52685	3.03263	3.34089	2.06121	4.31178
			S28	3.12323	2.82719	3.30332	3.19881	3.86399	3.31699	2.25194
			S29	8.44384	7.64766	4.7412	5.38202	5.80135	3.4558	5.38934
			S30	4.80657	5.18249	6.51546	6.8356	8.50255	4.9067	7.87405
M8	R01	D1	S1	0.178599	0.371376	0.241917	0.255419	0.200701	0.239236	0.23576
			S2	0.130699	0.134591	0.114048	0.0801993	0.135016	0.187448	0.0878424
			S3	0.238161	0.17153	0.335455	0.296779	0.216066	0.397586	0.33498
			S4	0.132879	0.144834	0.127412	0.0548798	0.163095	0.149584	0.109726
			S5	0.447706	0.422768	0.360283	0.135092	0.293769	0.335797	0.588561
			S6	0.30569	0.279156	0.321475	0.295171	0.379657	0.384024	0.351648
			S7	0.265836	0.182779	0.145868	0.134672	0.269532	0.271972	0.393935
			S8	0.253086	0.17217	0.300785	0.334716	0.200485	0.219081	0.336284
			S9	0.302552	0.245742	0.295211	0.303066	0.38031	0.604097	0.354641
			S10	0.252658	0.354795	0.208387	0.0795468	0.346403	0.441925	0.397878
			S11	0.262776	0.309045	0.260179	0.241465	0.219348	0.226268	0.292255
			S12	0.279383	0.202991	0.178629	0.257447	0.305613	0.332542	0.241469
			S13	0.0908133	0.204164	0.23572	0.271937	0.0818639	0.108868	0.122395
			S14	0.534492	0.466387	0.611069	0.490758	0.369272	0.535348	0.438804
			S15	0.254158	0.215976	0.164078	0.162299	0.219572	0.235784	0.238568
M8	R01	D2	S1	0.644967	0.723988	0.568427	0.385338	0.762726	0.600161	0.487565
			S2	0.189732	0.173028	0.17746	0.129521	0.181477	0.265298	0.14589
			S3	0.245472	0.256772	0.166401	0.271341	0.149062	0.161478	0.160193

## Sheet: VD-Non_V1-L23 apical dendrites
				BL1	BL2	BL3	VD1	VD2	VD3	VD7
Mouse ID	ROI	Dendrite ID	Spine ID
M1	R01	D1	S1	0.678139	1.31271	0.981919	1.64028	1.64823	0.969962	1.31813
			S2	0.61429	0.737376	0.703843	1.6014	0.822104	0.621105	0.746169
			S3	0.668358	0.414624	0.676328	0.872008	0.75415	0.463386	0.550152
			S4	0.582477	0.592253	0.895572	0.594289	0.505013	0.681601	0.61233
			S5	0.534792	0.637496	0.470392	0.461488	0.438703	0.231014	0.600263
			S6	0.838202	0.453883	0.790025	1.14832	1.62485	1.00673	1.90348
			S7	0.545053	1.3623	0.411057	0.578975	0.77224	0.524582	0.676793
M1	R01	D2	S1	0.35381	0.424264	0.41877	0.364982	0.321277	0.395174	0.567879
			S2	0.762898	0.555135	1.14277	0.804324	0.780028	0.896602	1.00765
			S3	0.6651	0.703588	0.620448	0.631751	0.512751	0.491643	0.570931
			S4	0.609936	0.584281	0.535935	0.469419	0.783296	0.655086	0.451958
			S5	0.73615	0.396332	0.587617	0.275738	0.783935	0.925275	1.78695
			S6	0.702076	0.866509	1.2409	0.741607	0.984939	0.71162	0.880906
			S7	0.411833	0.528587	0.337728	0.595333	0.290608	0.480484	0.762517
			S8	0.284121	0.542967	0.696777	0.255163	0.354283	0.482751	0.620988
			S9	1.70987	0.89739	0.900517	0.835876	1.03892	0.582106	1.20153
			S10	0.491767	0.384291	0.173688	0.358483	0.27595	0.218898	0.201723
			S11	0.85204	0.860681	0.670456	1.0376	0.836316	0.780304	1.05436
			S12	0.406644	0.505452	0.724759	0.688943	0.614019	0.27589	0.995573
			S13	0.676898	0.874823	0.832176	0.801806	0.780211	0.72292	0.573286
M1	R02	D1	S1	0.520483	0.566631	0.441108	0.894298	0.410853	0.375488	0.669341
			S2	0.635632	0.365307	0.323658	0.464524	0.288989	0.540996	0.35174
			S3	0.623919	0.542693	0.680838	0.775541	0.593647	0.729133	1.13749
			S4	0.406727	0.547094	0.348397	0.213899	0.335297	0.426957	0.182659
			S5	0.239761	0.185265	0.269758	0.232783	0.248166	0.0958863	0.266811
			S6	0.306203	0.378785	0.231486	0.328799	0.234036	0.505558	0.329868
			S7	0.398125	0.461861	0.503024	0.59171	0.29112	0.388378	0.565031
			S8	0.494881	0.844727	0.930979	0.653026	0.879876	0.684955	0.899495
			S9	0.427618	0.241949	0.385715	0.464985	0.137787	0.2448	0.612385
			S10	0.340998	0.136607	0.214042	0.269803	0.275191	0.31644	0.26251
			S11	1.07749	0.866371	1.16273	1.34842	1.30336	0.984212	1.11422
			S12	0.380652	0.34207	0.29924	0.283127	0.268535	0.150952	0.616546
			S13	0.600257	0.96879	0.398552	0.486933	0.19104	0.252731	0.556749
			S14	0.494785	0.53947	0.445176	0.610993	0.294095	0.401468	0.265397
			S15	0.490952	0.359271	0.317154	0.62482	0.220865	0.329233	0.370745
			S16	0.292402	0.430376	0.231575	0.232683	0.103073	0.173432	0.202724
			S17	0.16765	0.253289	0.245832	0.502415	0.145176	0.079635	0.275391
			S18	0.545635	0.657252	0.379918	0.510856	0.424295	0.367479	0.552918
			S19	0.582427	0.373239	0.350923	0.403037	0.46192	0.732986	0.52871
			S20	0.281736	0.412882	0.505095	0.875126	0.591353	0.713345	0.648726
			S21	0.49625	0.377559	0.241259	0.415186	0.303456	0.237552	0.289279
			S22	0.174397	0.195537	0.264207	0.125796	0.152418	0.205901	0.435928
M1	R02	D2	S1	0.325564	0.420646	0.367141	0.294637	0.401727	0.281954	0.258007
			S2	0.426246	0.594228	0.32245	0.525148	0.60622	0.445796	0.613914
			S3	0.536332	0.622427	0.36395	0.38384	0.329517	0.6009	0.20094
			S4	0.403163	0.741281	0.404708	0.497078	0.83812	0.644919	0.459145
			S5	0.641327	0.864117	0.613359	0.71068	0.750043	0.743741	0.8045
			S6	0.740589	0.58208	0.526615	0.406692	0.483361	0.806159	0.720456
			S7	0.369484	0.775988	0.534159	0.616872	0.506413	0.334266	0.542932
M2	R01	D1	S1	0.890789	0.758197	0.555401	0.684632	0.429664	0.44291	0.460969
			S2	0.913274	1.20108	0.981149	0.835452	1.65168	1.4711	1.52226
			S3	0.62087	0.825299	0.958888	0.66725	0.786498	0.408759	0.436805
			S4	0.684359	1.07732	0.646227	0.767438	0.769345	0.591282	0.511816
			S5	0.840099	0.842893	0.676998	0.758544	0.592941	0.669389	0.601991
M3	R01	D1	S1	2.65065	1.55439	0.555639	1.46231	0.629921	0.61829	0.666427
			S2	3.96717	2.99736	1.60734	3.53275	2.30241	2.81228	3.1539
			S3	0.802683	0.413632	0.341562	0.5451	0.595666	0.507995	0.78816
			S4	0.887886	2.44198	0.506403	0.728884	0.602468	0.482653	0.812328
			S5	1.93376	1.66141	0.67421	1.05683	1.36882	0.890272	2.61844
			S6	2.53337	1.80435	2.78151	1.65747	1.12201	1.09566	0.541119
			S7	1.59008	0.797819	0.828734	0.400496	0.618625	0.29989	1.44981
			S8	1.78071	1.0026	0.77778	1.84347	1.10155	0.8908	0.729962
			S9	1.21512	0.864926	1.88041	0.904493	0.536085	0.646748	0.723601
			S10	0.818025	0.554384	0.507904	0.473263	0.355078	0.451278	0.557806
			S11	3.96405	2.04686	1.394	1.88514	1.91901	1.81784	1.94546
M3	R01	D2	S1	0.450418	0.489734	1.16909	0.960305	0.974656	0.594477	0.959496
			S2	0.647181	0.790563	0.916355	0.6936	1.80171	0.461604	1.14721
			S3	3.44303	2.51902	3.71758	2.58271	2.22384	2.48031	2.9945
			S4	0.497534	0.542017	0.446925	0.539506	0.549609	0.626976	0.660196
			S5	0.345936	0.898437	0.432653	0.866639	0.69609	0.574739	1.34177
			S6	1.33157	1.3319	1.10232	1.3349	1.56889	1.2904	1.19217
			S7	1.51563	0.992101	0.902837	1.17387	0.834477	0.978592	1.39149
			S8	1.60784	0.833076	1.21179	1.03668	1.24162	0.936502	1.1689
			S9	2.29156	2.58439	3.74816	3.08953	2.87255	2.67461	3.47827
			S10	1.45889	1.074	1.05127	1.17975	0.808015	0.759681	0.671707
			S11	0.654402	0.458701	0.68314	0.720056	0.547709	0.931798	0.737717
			S12	1.24418	1.34498	1.10842	1.7916	1.14497	1.57774	1.27748
M3	R01	D3	S1	1.37387	1.07576	1.065	1.24149	1.33755	1.53469	1.93483
			S2	1.06887	0.709077	1.05461	0.984381	1.25265	1.29453	1.75172
			S3	0.377132	0.391869	0.845397	0.529628	0.965025	1.97658	1.44927
			S4	0.729635	0.585211	0.684381	0.960677	1.60349	0.967691	1.46683
			S5	0.210228	0.331442	0.364063	0.389018	0.518388	0.36841	0.488825
			S6	0.176181	0.633878	0.223162	0.218615	0.278545	0.429865	0.789518
			S7	2.0669	2.07396	1.66228	1.47877	1.72455	2.81837	2.48149
			S8	1.08062	1.36309	1.29686	1.27486	1.30002	1.98729	1.53209
			S9	1.17278	2.28076	2.30058	1.79034	2.03554	1.30309	1.81838
			S10	0.713295	0.648834	0.955778	0.990445	0.786013	0.891175	0.593343
			S11	0.688748	0.787326	0.77779	0.523196	1.10142	1.18	1.34587
			S12	0.394682	0.497521	0.511368	0.452087	0.58356	0.525283	0.404932
			S13	0.429891	0.595155	0.761417	0.563059	0.742326	0.659357	0.904159
			S14	0.744715	1.38057	0.907655	1.68658	1.56464	1.36898	1.71274
			S15	0.307102	0.315908	0.184535	0.78091	1.02934	1.1	1.31918
			S16	1.47943	1.18728	0.968991	1.19199	1.04772	0.97858	1.34482
			S17	0.605819	0.83774	0.938702	1.5904	0.939999	2.00184	1.03182
			S18	1.29938	1.23192	0.787875	1.31304	1.24356	1.38938	1.44204
			S19	2.22722	1.70112	1.09864	1.50761	1.3921	1.87633	1.89369
			S20	1.20965	1.34672	0.961216	1.1623	0.898205	0.736984	1.23084
			S21	1.89605	1.27719	1.62731	1.54081	1.90637	1.94996	1.78757
			S22	0.169432	0.33477	0.488088	0.461836	0.474391	0.626496	0.44272
M3	R01	D4	S1	0.464673	0.404469	0.837345	1.24814	1.08762	0.60661	0.967621
			S2	2.08095	2.69679	3.37239	2.90789	2.61124	2.70417	2.9824
			S3	1.53888	1.41344	1.16216	1.63295	1.48705	2.74622	2.24093
			S4	0.773187	1.40129	0.982565	1.57818	1.51719	1.23971	1.28048
			S5	2.10189	1.39068	2.05681	2.28935	2.85033	2.44261	1.49252
			S6	3.34801	2.14471	3.8554	3.91927	3.84622	1.83687	2.10015
			S7	0.880924	0.748657	1.15283	2.08409	1.0422	0.559635	0.689914
			S8	2.99242	1.92808	2.2585	2.58098	2.82594	2.02741	2.68186
			S9	1.24394	0.950786	2.83017	0.946576	1.48639	1.12988	0.842394
			S10	1.2509	0.950982	2.932	1.41566	1.32637	1.59322	1.39993
			S11	2.51316	1.97405	1.94957	0.964069	2.18864	1.45694	1.69213
			S12	1.23192	1.02654	1.53481	0.720222	0.844849	0.616717	0.846857
			S13	1.26765	2.54409	1.62843	2.543	1.36229	1.1418	1.86654
			S14	2.54392	1.49849	2.20438	2.9895	1.86557	2.3105	1.7138
			S15	1.05839	0.246659	0.688053	0.498791	0.396995	0.895945	0.439017
			S16	1.67434	1.48497	1.98856	1.3046	1.19192	1.12857	0.679873
			S17	0.914237	1.07935	1.41915	1.47537	1.12185	1.41359	1.24412
M4	R01	D1	S1	0.142572	0.0883034	0.109405	0.0993132	0.107452	0.0539965	0.124847
			S2	0.0644874	0.0931455	0.0880787	0.0536427	0.0877818	0.13208	0.0271894
			S3	0.120769	0.135974	0.245916	0.164198	0.130882	0.161854	0.177919
			S4	0.114637	0.104857	0.0875674	0.124305	0.0634274	0.0926962	0.0837615
			S5	0.551933	0.467819	0.33688	0.358008	0.378096	0.483118	0.30049
			S6	0.225394	0.2916	0.22597	0.320606	0.203684	0.196118	0.14176
			S7	0.301125	0.528461	0.338217	0.415336	0.280693	0.171232	0.196726
			S8	0.173465	0.339277	0.223954	0.173935	0.225596	0.178851	0.16895
			S9	0.729584	0.633756	0.638544	0.512847	0.34678	0.446137	0.496593
			S10	0.233483	0.310491	0.265517	0.24074	0.237249	0.284765	0.162606
			S11	0.230892	0.211966	0.200038	0.14304	0.172806	0.160425	0.163815
			S12	0.428487	0.481408	0.465843	0.432912	0.413401	0.354993	0.454409
			S13	0.789049	0.464115	0.601681	0.512564	0.413294	0.403934	0.325731
			S14	0.226904	0.156867	0.0916731	0.15026	0.155485	0.167494	0.127296
			S15	0.447397	0.915697	0.174639	0.171172	0.369573	0.177056	0.156042
			S16	0.573366	0.366707	0.255934	0.352365	0.286289	0.163023	0.300395
			S17	1.45602	0.829458	0.610443	1.06567	1.33388	0.656471	0.558403
			S18	0.590473	0.580052	0.444158	0.453056	0.474022	0.768051	0.229177
			S19	0.422767	0.458927	0.266642	0.305934	0.316106	0.643003	0.150931
			S20	1.35385	0.866571	0.812291	0.859691	0.840082	0.586936	0.410033
			S21	0.97542	0.585281	0.842962	0.594278	0.578317	0.463179	0.500076
			S22	0.690423	0.24155	0.420396	0.166677	0.192484	0.210893	0.335985
			S23	0.185517	0.095761	0.173423	0.190036	0.118169	0.212158	0.0898662
			S24	0.166342	0.22336	0.230598	0.176458	0.0925746	0.112903	0.107307
			S25	0.341854	0.279885	0.331988	0.353711	0.416882	0.44916	0.334134
			S26	0.232935	0.138794	0.193204	0.16998	0.169283	0.192724	0.141411
			S27	0.348417	0.589807	0.632342	0.346988	0.455477	0.297478	0.337431
			S28	0.59651	0.524564	0.445389	0.461607	0.469089	0.698901	0.427984
			S29	0.163789	0.184695	0.117705	0.133812	0.155074	0.0808463	0.103465
			S30	0.189267	0.105082	0.169492	0.106681	0.0678195	0.109443	0.104626
M4	R01	D2	S1	0.100523	0.0852363	0.0965502	0.0442669	0.156955	0.0792589	0.0850401
			S2	0.573587	0.527534	0.347741	0.454881	0.369016	0.421468	0.41322
			S3	0.167985	0.137778	0.14948	0.141752	0.190703	0.0724502	0.13995
			S4	0.660938	0.453384	0.343957	0.447616	0.190239	0.507007	0.267225
			S5	0.250543	0.31588	0.128188	0.140677	0.199688	0.225552	0.155179
			S6	0.291102	0.211116	0.157509	0.138346	0.126337	0.164477	0.165063
			S7	0.986592	1.16506	0.533149	0.561118	0.645485	0.649377	0.648679
			S8	0.543971	0.748964	0.546947	0.741437	0.387646	0.463404	0.27367
			S9	0.718318	0.887964	0.508632	0.698929	0.400328	0.674045	0.28962
			S10	0.643988	0.983094	0.500547	0.572604	0.592374	0.70053	0.437294
			S11	0.816257	0.754143	0.689761	0.67954	0.393326	0.76849	0.443084
			S12	0.426781	0.638143	0.361585	0.344273	0.185721	0.292571	0.663907
			S13	0.741606	0.490026	0.397519	0.35544	0.462852	0.350153	0.24907
			S14	0.260101	0.349495	0.245983	0.255573	0.171823	0.230045	0.231026
			S15	0.288206	0.432788	0.237169	0.367281	0.241919	0.264877	0.207066
			S16	0.480476	0.483499	0.298142	0.534039	0.129819	0.22831	0.268981
			S17	0.325828	0.212659	0.443033	0.173582	0.198074	0.364542	0.192568
			S18	0.394267	0.343905	0.249077	0.339227	0.30956	0.0555016	0.354972
			S19	0.369871	0.372075	0.149198	0.237752	0.0678927	0.165738	0.155618
			S20	0.182349	0.230432	0.19552	0.208062	0.168555	0.187533	0.138296
			S21	0.278343	0.299126	0.177881	0.294013	0.23718	0.192669	0.144717
			S22	0.548339	0.688165	0.339301	0.250549	0.349038	0.457982	0.34086
			S23	0.708281	0.952369	0.427956	0.524417	0.353374	0.290851	0.433462
			S24	0.377551	0.482001	0.465374	0.497656	0.268248	0.166966	0.163824
			S25	0.441474	0.45249	0.46698	0.411233	0.51625	0.39664	0.331645
			S26	0.0977492	0.174397	0.178257	0.161602	0.0807405	0.104919	0.0823977
M4	R02	D1	S1	0.552352	0.211729	0.291987	0.506163	0.278212	0.297425	0.0788894
			S2	0.210618	0.117875	0.13002	0.271383	0.388126	0.282043	0.0769817
			S3	0.0701386	0.114709	0.074738	0.0512732	0.0802698	0.104957	0.11329
			S4	0.20231	0.168607	0.185397	0.208696	0.236403	0.235377	0.185842
			S5	0.765798	0.62269	0.519855	0.711972	0.45318	0.606706	0.613614
			S6	0.230961	0.265807	0.111963	0.279649	0.186587	0.153738	0.127576
			S7	0.134944	0.353311	0.284167	0.424895	0.359415	0.37257	0.148039
			S8	0.212191	0.197069	0.210229	0.420751	0.37541	0.307144	0.263394
			S9	0.770807	0.37491	0.657794	0.618456	1.07094	0.616024	0.610987
			S10	0.252853	0.129029	0.179435	0.23159	0.284525	0.183375	0.22073
			S11	0.142077	0.138661	0.216897	0.20228	0.182092	0.206082	0.227047
			S12	0.150642	0.147978	0.219282	0.106953	0.159966	0.185716	0.137603
			S13	0.28247	0.26329	0.20647	0.284353	0.287638	0.312101	0.187859
			S14	0.273911	0.216308	0.193595	0.390807	0.23158	0.191425	0.181082
			S15	0.233584	0.293055	0.425533	0.209789	0.396785	0.297368	0.152285
			S16	0.118967	0.246506	0.21901	0.164168	0.222143	0.295081	0.15977
			S17	0.235135	0.406248	0.333081	0.405438	0.444559	0.486699	0.262435
			S18	0.132375	0.139689	0.153256	0.0836073	0.199011	0.162296	0.120491
			S19	0.498125	0.446283	0.442871	1.03601	0.590851	0.554001	0.464224
			S20	0.355373	0.403553	0.250157	0.39771	0.630239	0.318902	0.23593
			S21	0.232536	0.343479	0.381545	0.29055	0.277321	0.208764	0.338604
			S22	0.352705	0.407625	0.535608	0.313549	0.292247	0.21066	0.161455
			S23	0.198712	0.313052	0.187552	0.23899	0.341369	0.407181	0.204475
			S24	0.217729	0.220863	0.18542	0.297372	0.238612	0.321311	0.248379
			S25	0.409959	0.298765	0.25913	0.394322	0.456692	0.400664	0.42836
			S26	0.483384	0.519442	0.246606	0.360651	0.378856	0.475054	0.399762
			S27	0.178827	0.309674	0.231926	0.204718	0.300122	0.270203	0.209993
			S28	0.140562	0.0895523	0.113514	0.157662	0.20449	0.131588	0.452768
			S29	0.15216	0.144004	0.147764	0.168868	0.107294	0.0987952	0.16341
			S30	0.262676	0.266456	0.264254	0.303972	0.186772	0.184501	0.134773
			S31	0.652052	0.422533	0.529938	0.409976	0.571224	0.460374	0.393697
			S32	0.187002	0.11925	0.216085	0.223474	0.157361	0.165296	0.147763
			S33	0.0710415	0.0606643	0.107121	0.135852	0.137695	0.127619	0.0457682
			S34	0.125748	0.120532	0.112062	0.144559	0.0992847	0.147932	0.072511
			S35	0.15955	0.0817754	0.128094	0.157994	0.0635424	0.122295	0.251461
M5	R01	D1	S1	0.142979	0.153095	0.141424	0.0775877	0.0362824	0.0685133	0.0608958
			S2	0.380298	0.145388	0.151909	0.093937	0.108748	0.128237	0.129521
			S3	0.303137	0.247866	0.277891	0.18934	0.215826	0.217181	0.20026
			S4	0.300583	0.325846	0.303485	0.208675	0.284402	0.289042	0.18596
			S5	0.665276	0.659162	0.71894	0.550988	0.551054	0.649979	0.41822
			S6	0.144271	0.24136	0.150642	0.137258	0.40751	0.168924	0.0996759
			S7	0.308806	0.371511	0.478716	0.545709	0.799903	0.365223	0.398495
			S8	0.511195	0.844088	0.590824	0.625585	1.24789	0.551366	0.448814
			S9	0.221874	0.253733	0.112545	0.237332	0.217589	0.206338	0.370215
			S10	1.01331	1.58678	1.41081	0.636454	0.750456	0.883439	1.64763
			S11	0.228032	0.193849	0.289379	0.247886	0.129688	0.116013	0.362225
			S12	1.39314	1.47866	0.567294	0.960056	0.850846	0.673558	1.68472
			S13	0.89068	0.552019	0.276724	0.345893	0.175893	0.24096	0.390629
			S14	0.402307	0.450144	0.432645	0.349546	0.316469	0.285153	0.479682
			S15	0.270779	0.249358	0.308861	0.281014	0.200719	0.207775	0.402846
			S16	0.163865	0.14977	0.165816	0.114131	0.079883	0.319814	0.733119
			S17	0.246267	0.259622	0.227156	0.235483	0.161255	0.149875	0.219282
			S18	0.1069	0.177935	0.140089	0.155035	0.177506	0.213167	0.127744
			S19	0.194542	0.279556	0.144576	0.141377	0.287096	0.173934	0.371347
			S20	0.211137	0.374043	0.380201	0.2027	0.197167	0.166398	0.296483
			S21	0.170393	0.265416	0.251664	0.169441	0.174964	0.160662	0.297939
			S22	0.404359	0.84744	0.558194	0.475675	0.619029	0.563989	0.722355
			S23	0.23809	0.22752	0.191804	0.162796	0.212438	0.184304	0.212035
			S24	0.349276	0.384166	0.249663	0.154308	0.294994	0.184357	0.231167
			S25	0.737799	0.44986	0.286606	0.30048	0.370648	0.363723	0.548289
			S26	0.577596	0.372984	0.454687	0.332314	0.289639	0.3353	0.434575
			S27	0.676794	0.516925	0.562601	0.467781	0.693106	0.409946	0.650582
M5	R01	D2	S1	0.261708	0.274907	0.314341	0.16742	0.162555	0.14494	0.30843
			S2	0.288768	0.349761	0.431015	0.427344	0.187617	0.307734	0.441915
			S3	0.19521	0.192392	0.239939	0.158151	0.17597	0.196644	0.147807
			S4	0.224833	0.149198	0.260327	0.155403	0.141423	0.242054	0.158644
			S5	0.173737	0.204259	0.224887	0.191655	0.163307	0.163794	0.110442
			S6	0.0723058	0.188087	0.233996	0.191357	0.15273	0.0394817	0.231473
			S7	0.271088	0.500622	0.239152	0.340218	0.32727	0.618969	0.391407
			S8	0.767249	0.992795	0.886874	0.77941	0.589987	0.844503	0.555311
			S9	0.146655	0.248898	0.0788347	0.114777	0.137984	0.0758525	0.156723
			S10	0.310257	0.260183	0.147844	0.237702	0.104546	0.162138	0.214325
			S11	0.294626	0.2323	0.135789	0.209941	0.134373	0.255747	0.150096
			S12	0.227694	0.220569	0.140611	0.222077	0.14689	0.111218	0.0893905
			S13	0.134138	0.238491	0.171298	0.144053	0.180336	0.163547	0.178404
			S14	0.56705	0.369927	0.268534	0.394799	0.259592	0.201987	0.210273
			S15	0.848481	0.606847	0.785031	0.946633	0.925017	0.86081	0.751835
			S16	1.7918	0.952579	1.1426	1.97537	1.10114	0.74141	1.69246
			S17	1.46209	1.40826	1.46483	0.849336	1.39982	1.39454	1.24302
			S18	1.6331	1.61259	1.89221	1.35195	1.81615	1.0007	0.971131
			S19	2.33683	1.60267	1.27338	2.29489	1.93627	1.25062	1.62235
			S20	0.409436	0.338093	0.264404	0.310204	0.478461	0.327752	0.274459
			S21	0.332686	0.24092	0.111331	0.411479	0.365175	0.412758	0.349407
			S22	0.229928	0.226971	0.297773	0.199987	0.153118	0.173279	0.189115
			S23	0.982698	1.08518	0.913188	0.769625	0.701294	0.842394	0.921182
			S24	0.138286	0.140268	0.224193	0.170819	0.0889334	0.0743259	0.0820978
			S25	0.241379	0.261296	0.409531	0.526706	0.210504	0.430227	0.529988
			S26	0.285682	0.165523	0.280889	0.103647	0.10315	0.154066	0.253571
			S27	0.543179	0.530575	0.593344	0.330753	0.465382	0.38294	0.365342
M5	R02	D1	S1	0.466398	0.360724	0.430395	0.372915	0.378037	0.363838	0.395991
			S2	0.180102	0.137359	0.15471	0.179215	0.0963925	0.130039	0.105899
			S3	0.389388	0.335863	0.27363	0.264538	0.255897	0.333478	0.276958
			S4	0.171881	0.243933	0.19559	0.258161	0.347167	0.217957	0.182602
			S5	0.454672	0.257693	0.372446	0.462957	0.272382	0.252629	0.295165
			S6	0.40532	0.349519	0.415275	0.361614	0.192206	0.729727	0.271082
			S7	0.479179	0.362114	0.359653	0.494591	0.309209	0.46145	0.415343
			S8	0.518479	0.31146	0.345583	0.424227	0.289266	0.574141	0.384147
			S9	0.2367	0.159056	0.139561	0.261826	0.11073	0.148532	0.202553
			S10	0.376688	0.349139	0.518704	0.540293	0.304194	0.364949	0.211755
			S11	0.458954	0.373477	0.381173	0.49972	0.292843	0.433482	0.282027
			S12	0.648966	0.411095	0.482036	0.45826	0.571396	0.586899	0.594839
			S13	0.258115	0.205603	0.1337	0.225699	0.142887	0.256025	0.33421
			S14	0.579471	0.506428	0.482999	0.689887	0.546204	0.591349	0.453213
			S15	0.424654	0.326285	0.45533	0.46791	0.479637	0.376791	0.469492
			S16	0.327378	0.245747	0.217825	0.321154	0.4478	0.462908	0.38999
			S17	0.123998	0.13234	0.0749794	0.143731	0.0438137	0.0964126	0.11864
			S18	0.293093	0.169947	0.149555	0.19118	0.127017	0.132046	0.174965
			S19	0.682392	0.445101	0.521644	0.42979	0.476438	0.605273	0.372967
			S20	0.904961	0.474711	0.519354	0.474691	0.593733	0.530268	0.553625
			S21	0.162576	0.131358	0.194647	0.0847315	0.116922	0.122064	0.13339
			S22	0.54431	0.341899	0.267463	0.316087	0.314301	0.298401	0.338832
			S23	0.414568	0.148907	0.206857	0.177785	0.411611	0.258441	0.0979427
			S24	1.23358	0.845188	0.781597	1.19945	1.3751	1.27767	1.02661
			S25	0.380819	0.247579	0.375039	0.292004	0.270473	0.373341	0.212622
			S26	0.250851	0.217971	0.190617	0.25398	0.316898	0.22235	0.162332
			S27	0.606528	0.642169	0.606133	0.583089	0.576526	0.933843	0.512627
			S28	0.807557	0.716214	0.65968	0.531161	0.840937	0.693925	0.853978
			S29	0.160949	0.153001	0.24246	0.199549	0.304108	0.114536	0.393139
			S30	0.562565	0.389331	0.739566	0.451282	0.702761	0.636319	0.585854
			S31	0.443705	0.142307	0.234829	0.129287	0.160359	0.138507	0.0896003
			S32	0.313161	0.153768	0.193514	0.125882	0.141402	0.204904	0.188838
			S33	0.122758	0.056948	0.111373	0.109583	0.158429	0.146331	0.0734477
			S34	0.150144	0.13198	0.0744514	0.135799	0.101526	0.148628	0.207676
			S35	0.965386	0.759199	0.662059	0.941718	0.903296	0.868008	1.55173
			S36	0.239114	0.310502	0.264201	0.290649	0.194786	0.185922	0.248968
			S37	0.301705	0.188056	0.154096	0.205234	0.171484	0.191115	0.208928
			S38	0.605304	0.369372	0.55238	0.486478	0.492507	0.639201	0.687888
			S39	0.300695	0.269651	0.365079	0.34042	0.259814	0.339634	0.319945
			S40	0.221674	0.14418	0.167614	0.189747	0.110999	0.0961753	0.122409
			S41	0.303902	0.261312	0.19851	0.299396	0.12564	0.337385	0.224821
			S42	0.654201	0.554386	0.433379	0.640805	0.486793	0.69724	0.719175
			S43	0.456446	0.511781	0.494121	0.880742	0.519065	0.472921	0.517658
			S44	0.467546	0.472177	0.429553	0.312997	0.2737	0.371737	0.555754
			S45	0.435767	0.475044	0.326545	0.341838	0.315942	0.328841	0.416716
			S46	0.15655	0.125437	0.173564	0.195429	0.122747	0.160133	0.162987
			S47	0.376583	0.370383	0.338102	0.302889	0.191714	0.264858	0.338944
M5	R02	D2	S1	0.965533	0.634796	0.686124	0.707703	0.490205	0.604833	0.96717
			S2	0.176667	0.185836	0.104957	0.135031	0.145857	0.125103	0.159439
			S3	0.209506	0.155512	0.171995	0.201088	0.126532	0.197858	0.221317
			S4	0.832665	0.601902	0.459519	0.543322	0.454848	0.612687	0.782205
			S5	1.23793	1.34601	0.945645	0.853471	0.975268	1.10838	1.03764
			S6	0.18625	0.105546	0.14296	0.167743	0.157377	0.185072	0.650146
			S7	0.920057	0.645525	0.821414	0.759418	0.418187	0.303466	0.9797
			S8	0.474894	0.46333	0.324894	0.328383	0.732415	0.380053	0.554787
			S9	1.17496	0.893321	0.898327	1.41215	1.59312	2.08574	1.66748
			S10	0.286616	0.446355	0.505556	0.43616	0.306355	0.589316	0.973463
			S11	0.129667	0.400486	0.294991	0.358191	0.226541	0.165904	0.570692
			S12	0.583012	0.661768	0.368372	0.432321	0.570398	0.754194	0.726624
			S13	0.325956	1.17357	0.573941	0.480476	0.439395	0.464643	0.690689
			S14	0.600102	0.629157	0.311336	0.308117	0.298955	0.426831	0.523792
			S15	0.197947	0.444287	0.255789	0.169418	0.283083	0.212393	0.223059
			S16	0.467575	0.468177	0.251258	0.414857	0.41464	0.286862	0.502551
			S17	0.304618	0.282925	0.358626	0.171677	0.130078	0.129005	0.280615
			S18	0.368313	0.353105	0.275182	0.309011	0.246208	0.36754	0.330089
			S19	0.307269	0.159445	0.135434	0.154916	0.131001	0.194227	0.14852
			S20	0.279388	0.168091	0.180113	0.315264	0.209368	0.170772	0.293878
			S21	0.270429	0.179667	0.208817	0.444376	0.163203	0.531964	0.303182
			S22	1.00668	1.17765	0.729533	0.726468	0.671009	0.817031	0.815282
			S23	0.892811	0.308649	0.550665	0.499113	0.217176	0.511725	0.519187
M5	R03	D1	S1	0.245895	0.380173	0.132713	0.323531	0.227674	0.346889	0.18141
			S2	0.610198	0.696057	0.505944	0.592669	0.682832	0.446519	0.597402
			S3	0.976789	0.776575	1.04485	1.01288	0.811332	0.835359	1.05753
			S4	0.2182	0.207662	0.564421	0.315903	0.137795	0.352908	0.431697
			S5	1.7317	1.32994	1.87151	1.76848	1.43053	1.19032	2.05088
			S6	0.378518	0.348654	0.473889	0.363448	0.26936	0.500676	0.347124
			S7	1.18915	0.975992	0.643976	0.953581	0.846492	0.994126	1.24245
			S8	0.137138	0.190136	0.335968	0.197194	0.168218	0.180269	0.132185
			S9	0.422839	0.547301	0.521771	0.582944	0.429105	0.49616	0.456684
			S10	0.49333	0.399861	0.690231	0.336963	0.648073	0.574033	0.812575
			S11	0.287909	0.218821	0.289012	0.263543	0.232791	0.189835	0.20024
			S12	0.355765	0.857032	0.390956	0.453178	0.302877	0.211367	0.225238
			S13	0.287044	0.259052	0.307142	0.21953	0.24564	0.234537	0.154083
			S14	0.342512	0.340362	0.33179	0.387085	0.314318	0.374277	0.263071
			S15	0.25802	0.424908	0.39591	0.456372	0.437124	0.23384	0.267729
M5	R03	D2	S1	0.234802	0.281168	0.351325	0.300429	0.264257	0.230261	0.230686
			S2	0.13176	0.220598	0.260699	0.217765	0.162429	0.43376	0.317835
			S3	0.673137	0.351724	0.487135	0.428854	0.550789	0.192647	0.418968
			S4	1.24552	1.53759	1.0616	0.772553	1.02143	1.12665	1.67398
			S5	0.634079	0.190467	0.131863	0.234164	0.112705	0.095358	0.281499
			S6	1.09455	0.788166	0.7703	0.849933	0.625492	1.09397	0.73426
			S7	1.6745	0.635753	1.01636	0.655355	0.919234	0.800638	0.54555
			S8	0.35317	0.235763	0.302832	0.214282	0.233949	0.333225	0.302402
			S9	2.1512	1.39287	2.24436	2.01778	1.53068	1.75869	1.67315
			S10	1.23024	0.751671	0.834079	0.494184	0.962719	0.858707	0.951809
			S11	0.300551	0.303636	0.370596	0.292744	0.222895	0.201006	0.338949
			S12	1.05252	0.936701	1.41638	1.15607	1.08968	0.980066	1.08042
			S13	0.747128	0.651369	0.662769	0.719706	0.489718	0.612561	0.660369
			S14	0.228686	0.153916	0.178306	0.113203	0.0980697	0.159531	0.169861
			S15	0.24414	0.18772	0.276724	0.346879	0.13856	0.236849	0.204914
			S16	0.330839	0.344679	0.390787	0.380881	0.218848	0.335522	0.281321
			S17	0.160075	0.138848	0.163932	0.161308	0.0986879	0.128592	0.188639
			S18	0.171247	0.153823	0.228615	0.183905	0.191929	0.149136	0.145093
			S19	0.158182	0.196275	0.143892	0.254156	0.103166	0.158739	0.178979
			S20	0.426568	0.261328	0.316013	0.478803	0.152105	0.224092	0.368386
			S21	0.435507	0.2588	0.45307	0.368224	0.334193	0.30553	0.321101
			S22	0.212651	0.280119	0.224518	0.227379	0.118857	0.236699	0.273609
M5	R03	D3	S1	0.358704	0.26766	0.318958	0.284394	0.316725	0.269531	0.217968
			S2	0.790908	0.582525	0.61942	0.700846	0.889576	0.492111	0.602373
			S3	0.815226	0.886919	0.992632	1.29166	1.12822	0.912952	0.985611
			S4	0.237339	0.329565	0.369252	0.544656	0.49412	0.616355	0.382379
			S5	0.294466	0.204647	0.191474	0.342885	0.349735	0.352334	0.324614
			S6	0.405304	0.512263	0.331702	0.403126	0.539719	0.47701	0.49788
			S7	1.18652	1.71992	1.58303	1.89922	1.59841	1.94548	2.54324
			S8	0.621935	0.861727	1.05548	0.609379	0.570344	0.638219	1.18008
			S9	0.265656	0.326506	0.23362	0.214391	0.20544	0.298457	0.175588
			S10	0.649457	0.299279	0.524294	0.614096	0.516987	0.675804	0.459696
			S11	0.304381	0.330701	0.197449	0.40825	0.335979	0.208362	0.579858
			S12	3.39059	1.52777	3.18486	2.12716	3.1828	2.22914	3.39453
			S13	1.04117	0.929766	1.24459	1.01734	1.15747	0.432073	1.03604
			S14	0.402118	0.315223	0.367522	0.270095	0.209398	0.266643	0.181881
			S15	0.746093	0.485967	0.842248	0.59453	0.539691	0.593921	0.465965
			S16	0.337646	0.198343	0.372095	0.34996	0.262254	0.276685	0.250014
			S17	0.442871	0.446107	0.389076	0.444194	0.586908	0.452801	0.298199
			S18	0.315694	0.409857	0.368815	0.402826	0.568701	0.295976	0.274198
			S19	0.590806	0.522574	0.764223	0.339571	0.455993	1.05662	0.72591
			S20	0.31044	0.316314	0.499468	0.330373	0.506611	0.235439	0.253792
			S21	0.521197	0.423266	0.31126	0.253771	0.397091	0.41724	0.331208
			S22	0.197656	0.317135	0.262175	0.327876	0.291129	0.327171	0.554276
M6	R01	D1
			S1	0.769655	0.558106	0.473633	0.494354	0.322784	0.467511	0.760013
			S2	0.414466	0.704901	0.350474	0.419796	0.393841	0.509159	0.553593
			S3	0.388412	0.675364	0.341942	0.338629	0.34765	0.27407	0.93374
			S4	0.280251	0.439291	0.20356	0.232846	0.339471	0.173897	0.43854
			S5	1.27791	1.4695	1.30932	0.714955	0.975383	1.20803	1.70204
			S6	0.675266	0.803519	0.711968	0.377623	0.503337	0.70131	0.853497
			S7	0.631108	1.02771	0.77185	0.382202	0.484194	0.450924	0.93287
			S8	0.383167	0.510036	0.193556	0.157217	0.14042	0.201666	0.423027
			S9	0.325802	0.315654	0.275081	0.221866	0.166723	0.197077	0.284298
			S10	0.267461	0.200114	0.132814	0.108283	0.0842705	0.167881	0.116274
			S11	0.203381	0.38842	0.277798	0.133334	0.221134	0.18274	0.340923
			S12	0.201467	0.185686	0.237061	0.129364	0.107261	0.127543	0.224679
			S13	0.499725	0.330486	0.325848	0.208781	0.320717	0.362251	0.155997
			S14	1.08647	0.504684	1.20872	0.460292	0.551098	0.733545	0.80358
			S15	0.669684	0.469974	0.422358	0.233023	0.305252	0.351215	0.444657
			S16	1.92215	1.60107	2.07152	0.76497	0.953663	1.40478	0.957222
			S17	0.237064	0.166277	0.189995	0.0957429	0.155838	0.0747928	0.0777467
			S18	0.297352	0.369174	0.228869	0.413219	0.199631	0.247076	0.555809
			S19	0.531031	1.48044	0.638703	1.13974	0.840271	0.66095	0.860094
			S20	2.09625	2.18188	1.59584	2.67181	2.45423	1.78353	2.7741
			S21	1.09309	0.623087	0.747996	1.10343	0.669385	0.677849	0.931396
			S22	1.07329	1.68002	0.90677	0.72326	0.963507	1.06965	1.7133
			S23	0.240459	0.243287	0.50507	0.165881	0.303142	0.201266	0.492753
			S24	0.341595	0.428596	0.211914	0.134648	0.131573	0.152466	0.485316
			S25	0.179366	0.195102	0.23985	0.202502	0.268317	0.314009	0.315639
			S26	0.104603	0.108796	0.103396	0.0501107	0.0731428	0.104318	0.0626263
			S27	0.217244	0.205794	0.236741	0.146562	0.239579	0.262749	0.344343
			S28	0.370212	0.546218	0.35419	0.399046	0.506162	0.63554	0.621051
			S29	0.56299	0.597058	0.400362	0.393814	0.395578	0.425138	0.56907
			S30	0.181423	0.320541	0.12075	0.330197	0.107935	0.146294	0.177634
			S31	0.356957	0.232811	0.115728	0.250425	0.135428	0.159784	0.273226
			S32	0.419379	0.621987	0.410077	0.220642	0.214888	0.379357	0.457818
			S33	0.5825	0.556894	0.782932	0.391208	0.358914	0.261694	0.800977
			S34	0.429532	0.439707	0.363032	0.206233	0.313291	0.530611	0.200138
			S35	0.59742	0.442502	0.360432	0.261294	0.298174	0.321437	0.147259
			S36	0.196421	0.220786	0.24617	0.145616	0.125348	0.101637	0.0944328
M6	R01	D2	S1	0.570554	0.558967	0.409302	0.295975	0.554174	0.546637	0.633646
			S2	0.253539	0.287278	0.18542	0.151106	0.0990567	0.118884	0.133289
			S3	0.434372	0.606509	0.221325	0.286842	0.185913	0.272003	0.306029
			S4	1.10953	1.57954	0.535759	0.524444	0.491103	0.57261	1.00898
			S5	1.40089	1.53582	2.18651	0.988329	1.14697	0.63997	1.97266
			S6	0.734857	0.459174	0.164364	0.259002	0.119195	0.243817	0.301816
			S7	0.189357	0.214552	0.0922851	0.14744	0.139895	0.117387	0.158774
			S8	0.25206	0.173848	0.160399	0.145716	0.239712	0.0857954	0.173979
			S9	0.256023	0.200524	0.152096	0.101563	0.0715174	0.0742652	0.312006
			S10	0.653742	0.523544	0.576125	0.325504	0.425178	0.215476	0.410402
M6	R02	D1	S1	0.372011	0.438716	0.806647	0.42627	0.442272	0.37361	0.600867
			S2	0.295116	0.375807	0.313511	0.175155	0.149594	0.284765	0.219971
			S3	0.299898	0.444885	0.173478	0.144501	0.208991	0.17487	0.248741
			S4	0.390371	0.501386	0.551003	0.129338	0.347938	0.363318	0.327406
			S5	0.74475	0.999461	1.06885	0.798351	0.802915	0.694724	0.611291
			S6	0.441558	0.646583	0.559762	0.62588	0.328348	0.633337	0.683011
			S7	0.774601	0.622869	0.784939	0.643223	0.652952	1.11259	0.677732
			S8	1.01324	0.849301	1.68115	1.80329	1.24307	1.06861	1.51766
			S9	0.34408	0.360861	0.768727	0.259529	0.34673	0.626995	0.352301
M6	R02	D2	S1	0.182011	0.385288	0.653798	0.225138	0.32844	0.192579	0.268569
			S2	0.536773	0.908016	0.564213	0.639056	0.921725	0.590401	0.858946
			S3	1.11465	0.912832	0.861255	0.996807	0.659202	0.644307	1.05675
			S4	0.441896	0.386418	0.751944	0.286161	0.233186	0.221022	0.359999
			S5	1.43071	0.611657	1.03836	0.789527	1.13979	1.009	1.4471
			S6	0.913874	0.399062	0.715623	0.308234	0.481005	0.481311	0.518951
			S7	0.803858	1.25048	1.55036	1.35767	1.02197	1.37781	0.87684
			S8	0.385145	0.156004	0.73328	0.245761	0.524143	0.245592	0.247303
			S9	0.542685	0.420171	0.588258	0.316534	0.505763	0.558644	0.576555
			S10	0.394472	0.295492	0.529162	0.2943	0.309876	0.301331	0.264442
			S11	0.130471	0.202065	0.419013	0.198335	0.287669	0.21001	0.172891
			S12	0.295571	0.384885	0.511569	0.232426	0.416048	0.222946	0.265515
			S13	0.540507	0.581528	0.757683	0.419583	0.445178	0.44728	0.7225
M6	R02	D3	S1	0.553503	0.801242	0.457099	0.418648	0.68327	0.435939	0.393389
			S2	0.168557	0.261595	0.327287	0.453207	0.309881	0.24989	0.261725
			S3	0.427381	0.260345	0.403864	0.247309	0.360147	0.186067	0.26823
			S4	0.438689	0.687436	0.590195	0.696839	0.752506	0.945786	0.931917
			S5	0.750402	0.476896	0.362435	0.4389	0.697329	0.498068	0.552556
			S6	0.537767	0.175582	0.363658	0.185241	0.206785	0.175663	0.186635
			S7	0.300471	0.174962	0.245813	0.132841	0.125145	0.144243	0.174883
			S8	0.412793	0.435303	0.421897	0.450547	0.414607	0.406157	0.443909
			S9	0.271344	0.328527	0.290616	0.412935	0.255654	0.26494	0.316617
			S10	0.254267	0.247132	0.139118	0.0891315	0.0666765	0.137466	0.101159
			S11	0.164114	0.135478	0.134491	0.267708	0.178758	0.114772	0.0959147
			S12	0.19324	0.081014	0.154838	0.252471	0.156539	0.149078	0.0786975
			S13	0.435779	0.298672	0.27925	0.355575	0.278666	0.398578	0.27346
			S14	1.24851	0.867157	0.829474	0.850607	0.503024	0.684775	0.624493
			S15	0.708786	0.68819	0.461752	0.520945	0.510686	0.73096	0.532436
			S16	0.461067	0.186495	0.177855	0.17048	0.423387	0.266316	0.325432
			S17	0.646983	0.494273	0.529005	0.515899	0.417947	0.882213	0.55192
			S18	1.03038	0.835077	0.684741	0.500634	0.662547	0.878317	0.673197
			S19	0.312846	0.203768	0.200293	0.257645	0.259666	0.17365	0.255025
			S20	0.544407	0.206158	0.2796	0.187914	0.108796	0.166498	0.237241
			S21	0.424588	0.399036	0.348654	0.361464	0.518251	0.283412	0.365453
			S22	0.330864	0.296751	0.275902	0.247198	0.254561	0.333476	0.314584
			S23	0.378438	0.289682	0.239145	0.204027	0.182889	0.195256	0.36074
			S24	0.191698	0.340943	0.485927	0.225779	0.362802	0.313236	0.259751
M6	R02	D4	S1	0.280993	0.698277	0.288761	0.283915	0.417126	0.311009	0.434905
			S2	0.259604	0.306124	0.276841	0.200029	0.361005	0.205445	0.215746
			S3	0.231159	0.492926	0.338185	0.406962	0.428785	0.240245	0.278544
			S4	0.51331	0.661074	0.535026	0.324247	0.317501	0.40878	0.556226
			S5	0.130047	0.271593	0.156726	0.171474	0.183006	0.138622	0.139623
			S6	0.199599	0.397387	0.21931	0.252156	0.424262	0.360855	0.405815
			S7	0.155667	0.209937	0.143996	0.158126	0.184361	0.191917	0.224974
			S8	0.149898	0.265446	0.226785	0.0883623	0.145741	0.13837	0.232794
			S9	0.135151	0.448047	0.259785	0.27326	0.310326	0.263861	0.208375
			S10	0.168861	0.524102	0.47618	0.274992	0.414561	0.260952	0.187969
			S11	0.440499	0.879859	0.782898	0.657872	0.79655	0.762008	0.754332
			S12	0.317718	0.378762	0.357388	0.45815	0.235028	0.204709	0.264053
			S13	0.189745	0.191732	0.235887	0.129215	0.189544	0.166534	0.140457
			S14	0.156356	0.311094	0.243653	0.190142	0.174756	0.231154	0.272539
M6	R02	D5	S1	0.122876	0.193395	0.177501	0.223873	0.195009	0.217371	0.28119
			S2	0.294855	0.393643	0.355155	0.292655	0.419363	0.442697	0.481216
			S3	0.222627	0.252845	0.226153	0.231242	0.20511	0.217894	0.175563
			S4	0.295711	0.303006	0.285903	0.199392	0.423559	0.221331	0.224292
			S5	0.50412	0.451752	0.470397	0.360854	0.382075	0.34202	0.276967
			S6	0.779192	0.543908	0.454738	0.21316	0.463597	0.424732	0.371876
			S7	0.327587	0.377994	0.423382	0.366683	0.513749	0.453525	0.366427
			S8	0.197167	0.234542	0.208368	0.291908	0.175504	0.325444	0.330289
			S9	0.51381	0.496094	0.750656	0.472046	0.636796	0.498868	0.442637
			S10	0.277218	0.265714	0.215149	0.239258	0.24528	0.294389	0.338991
			S11	0.189868	0.073739	0.15595	0.0346306	0.206426	0.0699467	0.161628
			S12	0.909375	0.804934	1.18649	0.604192	1.35741	0.816247	0.609025
			S13	0.19277	0.304746	0.190626	0.134948	0.170051	0.161229	0.108121
			S14	0.073935	0.140534	0.15277	0.139794	0.297882	0.155735	0.130508
			S15	0.565366	0.546471	0.574779	0.465049	0.694275	0.509326	0.718879
			S16	0.692948	0.573154	0.752537	0.500562	0.433652	0.517967	0.550235
			S17	0.547634	0.547798	0.443273	0.361451	0.48481	0.298633	0.463824
			S18	0.192092	0.57721	0.234091	0.201244	0.237821	0.24822	0.140124
M6	R03	D1	S1	0.259534	0.483109	0.280173	0.132656	0.190267	0.228301	0.235919
			S2	0.594697	0.562959	0.66451	0.390446	0.48336	0.479596	0.65681
			S3	0.319093	0.455405	0.212132	0.130226	0.18971	0.218288	0.263216
			S4	0.546448	0.427081	0.260423	0.380828	0.452069	0.302444	0.24925
			S5	0.717538	0.604166	0.60274	0.511595	0.435561	0.401328	0.340309
			S6	0.56211	0.420332	0.609799	0.435213	0.403012	0.453247	0.439146
			S7	0.70009	0.438671	0.451648	0.393519	0.558796	0.670266	0.442077
			S8	0.564427	0.46689	0.517605	0.530463	0.455243	0.510117	0.36589
			S9	1.03998	0.792369	0.696804	0.824947	0.752315	0.760245	0.804727
			S10	0.921528	0.7801	0.76753	0.924154	0.829284	0.950587	0.928741
			S11	0.422042	0.501037	0.552935	0.587663	0.445972	0.402927	0.474576
			S12	0.62049	0.382511	0.475323	0.455526	0.477416	0.511661	0.506254
			S13	1.56917	2.07588	1.90662	1.58675	2.64959	1.61002	2.29277
			S14	0.626552	0.526143	0.460261	0.409039	0.431191	0.474199	0.40471
			S15	0.395567	0.266465	0.369739	0.292994	0.333716	0.416836	0.236812
			S16	0.366847	0.442694	0.712848	0.419868	0.713542	1.44823	0.395913
			S17	0.854308	0.55203	0.820112	0.409015	1.04626	1.50518	0.48308
			S18	0.556339	0.73795	0.592424	0.4468	0.391088	0.609315	0.634478
			S19	0.695913	1.14789	0.919237	0.777941	1.00322	1.26253	0.639187
			S20	0.599418	0.438652	0.920281	0.684464	0.577851	1.31881	0.613412
			S21	0.765473	1.38801	1.0051	0.758013	0.648529	1.16452	0.773856
			S22	0.616965	1.20654	0.560176	0.793326	0.601119	0.637076	0.460698
			S23	0.664195	0.599219	0.899178	0.631783	0.616475	0.677767	0.609886
			S24	0.2809	0.55081	0.275645	0.126574	0.136758	0.165278	0.240016
			S25	0.295573	0.24284	0.209542	0.201208	0.214213	0.186752	0.234205
			S26	0.431513	0.220096	0.35272	0.238578	0.132696	0.204986	0.25566
			S27	0.575193	0.500326	0.659812	0.290898	0.213148	0.23337	0.309627
			S28	0.475195	0.402583	0.33496	0.243575	0.178639	0.196688	0.248543
			S29	0.656429	0.599297	0.488858	0.37528	0.561702	0.376097	0.206688
			S30	0.409313	0.545833	0.517101	0.445384	0.367895	0.424297	0.395439
			S31	0.698147	0.618851	0.79718	0.459614	0.667635	0.480905	0.452613
			S32	0.359528	0.501114	0.348012	0.258457	0.308882	0.275511	0.314995
			S33	0.33835	0.50767	0.52737	0.368932	0.539928	0.3593	0.459773
			S34	0.797985	0.821275	0.722525	0.421901	0.634573	0.394471	0.4224
M6	R03	D2	S1	0.521924	0.959938	0.485763	0.66428	0.989379	0.624784	0.637108
			S2	0.28983	0.400989	0.372833	0.307753	0.283085	0.572816	0.575185
			S3	0.208499	0.250432	0.4039	0.549813	0.158891	0.256025	0.389521
			S4	0.335684	0.537769	0.460387	0.356281	1.32913	0.594788	0.487299
			S5	0.99751	0.692619	0.672764	1.00302	0.965378	0.774138	0.799863
			S6	0.762221	0.682121	0.893795	0.841909	2.03286	1.18811	0.983634
			S7	0.283517	0.193863	0.719673	0.397059	1.08263	0.921177	0.518237
			S8	0.507267	0.654966	0.41768	0.368949	0.632163	0.412308	0.560276
			S9	0.706093	0.596642	0.64774	0.534615	0.699736	1.19443	1.01615
			S10	0.934034	0.79989	0.793712	0.553775	0.728303	0.476147	0.483833
			S11	0.590406	0.364758	0.36429	0.421418	1.38651	0.892613	0.259093
M6	R03	D3	S1	1.04043	1.0223	1.36683	0.648977	0.837926	0.880276	0.662545
			S2	0.988025	0.97649	1.34242	0.365455	0.753596	0.417535	0.387863
			S3	0.890479	0.945728	1.26158	0.561546	0.60933	0.736334	0.631596
			S4	0.63989	0.831673	0.66853	0.345056	0.477924	0.492854	0.330669
			S5	2.19532	1.63309	1.71682	1.39179	1.47006	1.75551	1.6898
M6	R04	D1	S1	0.414601	0.303741	0.564252	0.256344	0.322738	0.285205	0.333791
			S2	0.193793	0.113777	0.264647	0.152931	0.231066	0.367273	0.202484
			S3	0.629283	0.712492	0.999238	0.382004	0.356614	0.641427	0.527757
			S4	0.335478	0.268995	0.27642	0.13337	0.180686	0.157238	0.128274
			S5	0.993075	0.804025	1.05999	0.888843	0.605813	0.870373	0.70418
			S6	0.307922	0.251923	0.321341	0.160104	0.166627	0.226907	0.172497
			S7	0.347999	0.293069	0.370099	0.234202	0.371205	0.327997	0.411019
			S8	0.176844	0.247828	0.158523	0.111738	0.192925	0.223858	0.132444
			S9	0.516572	0.281053	0.231482	0.352282	0.234761	0.323107	0.136124
			S10	0.202949	0.331677	0.190862	0.195075	0.115596	0.232512	0.261473
			S11	0.316548	0.0908723	0.235746	0.121336	0.144508	0.106496	0.115651
			S12	0.237203	0.0817725	0.19152	0.0877417	0.102791	0.145319	0.126017
			S13	0.197006	0.120244	0.189012	0.0673153	0.0818942	0.125012	0.118463
M6	R04	D2	S1	0.486519	0.699978	0.688474	0.629533	0.647008	0.840112	0.558674
			S2	0.241347	0.13885	0.120865	0.21082	0.130216	0.164003	0.362001
			S3	0.229792	0.182158	0.13608	0.359193	0.194287	0.33262	0.386439
			S4	0.18917	0.12994	0.108434	0.197418	0.11128	0.145599	0.420574
			S5	0.169507	0.117786	0.166249	0.150501	0.215934	0.24262	0.19099
			S6	0.112462	0.113618	0.250308	0.162012	0.216647	0.233384	0.193819
			S7	0.0442751	0.0852809	0.187556	0.0652834	0.120686	0.11125	0.0767724
			S8	0.138105	0.173071	0.260608	0.119308	0.15035	0.232548	0.26108
			S9	0.189939	0.549278	0.320613	0.148627	0.114933	0.180448	0.18732
			S10	0.467686	1.54466	0.485053	0.42104	0.550748	0.535702	0.518542
			S11	0.444348	0.492697	0.521859	0.482238	0.488784	0.451305	0.559961
			S12	0.120702	0.118919	0.204757	0.0774756	0.078885	0.0440681	0.176944
			S13	0.220175	0.133454	0.301511	0.258408	0.221613	0.214751	0.234338
			S14	0.276704	0.185161	0.214784	0.198175	0.310424	0.357299	0.303828
			S15	0.345529	0.219835	0.236973	0.278362	0.264059	0.259145	0.360312
			S16	0.354497	0.330857	0.271545	0.293481	0.431895	0.357859	0.302808
			S17	0.432343	0.722288	0.671346	0.428221	0.592479	0.49243	0.61052
			S18	0.270217	0.683133	0.421402	0.149908	0.198308	0.159303	0.205136
M6	R04	D3	S1	0.0801356	0.118231	0.134949	0.0967819	0.182551	0.10969	0.0935195
			S2	0.12822	0.142978	0.159578	0.216462	0.203799	0.134817	0.127868
			S3	0.483977	0.323204	0.423357	0.399456	0.53544	0.484071	0.418404
			S4	0.498854	0.261573	0.359299	0.222483	0.431584	0.260949	0.290771
			S5	0.215392	0.134264	0.233595	0.302183	0.0786384	0.0609483	0.0762653
			S6	0.393073	0.380947	0.521996	0.33218	0.575445	0.349949	0.490971
			S7	0.412173	0.361095	0.369161	0.88977	0.43279	0.404514	0.397084
			S8	0.56076	0.407441	0.339165	0.486437	0.307273	0.33183	0.394532
			S9	0.121964	0.0785448	0.101734	0.113941	0.0999459	0.0642693	0.11367
			S10	0.157618	0.145291	0.22188	0.138831	0.121806	0.143916	0.0782402
			S11	0.148785	0.0972717	0.114038	0.127419	0.121164	0.0936669	0.069379
			S12	0.20185	0.069323	0.120566	0.136886	0.0564122	0.0733201	0.0750932
			S13	0.137471	0.0851502	0.151929	0.150558	0.20629	0.195359	0.107212
			S14	0.219584	0.120672	0.118937	0.129817	0.194246	0.154249	0.140363
M6	R04	D4	S1	0.476915	0.299448	0.338147	0.424469	0.328178	0.408417	0.492192
			S2	0.605723	0.582288	0.4515	0.455965	0.452542	0.438679	0.454102
			S3	1.01054	0.954377	0.611336	0.980454	1.2854	0.816924	0.800655
			S4	0.676529	0.641579	0.476053	0.851625	1.09605	0.37813	0.514376
			S5	1.20679	1.05445	1.03127	0.796262	0.860256	0.725246	0.823506
			S6	0.55693	0.454094	0.425909	0.454944	0.446029	0.338909	0.917123
			S7	0.334665	0.278736	0.273404	0.226394	0.370785	0.192065	0.228942
			S8	0.501082	0.216237	0.353149	0.490205	0.181784	0.248712	0.187725
			S9	0.583114	0.191203	0.46918	0.682914	0.683164	0.594805	0.535341
			S10	0.35961	0.801833	0.502969	0.540861	0.370233	0.307074	0.337449
			S11	1.27494	0.921279	1.20143	0.95365	1.04258	1.39644	0.939662
			S12	0.538012	0.461595	0.281544	0.479655	0.272284	0.392932	0.371167
			S13	0.745005	0.596741	0.163759	0.84928	0.511526	0.582205	0.606372
			S14	0.847809	0.56288	0.456059	0.603885	0.560792	0.629341	0.579854

## Sheet: VD-V1-L23 basal dendrites
				BL1	BL2	BL3	VD1	VD2	VD3	VD7
Mouse ID	ROI	Dendrite ID	Spine ID
M1	R01	D1	S1	0.455146	0.558952	0.633174	0.906648	1.17956	0.44019	1.00926
			S2	0.94273	0.837539	0.641036	0.835132	1.03417	0.395585	1.18901
			S3	1.20938	1.33461	1.88977	1.83856	1.8207	1.05353	1.73401
			S4	0.807869	1.03652	1.1762	0.942117	0.885007	0.870927	1.34114
			S5	1.39694	1.88008	1.51426	1.69117	1.9026	1.33568	3.29693
			S6	1.77449	1.76725	2.19244	2.178	1.83297	1.59923	2.44351
			S7	2.45399	1.95358	1.61016	3.43755	2.70256	2.0345	2.42649
			S8	0.441717	0.949954	0.931101	1.71146	2.59002	1.64917	2.20353
			S9	1.14881	1.33903	0.602924	1.18767	1.1587	0.666563	0.712097
			S10	0.80233	0.952907	0.712256	1.83983	2.11497	1.06609	0.924184
			S11	1.08078	1.0877	1.36236	1.62194	1.8444	1.32971	1.98416
M1	R01	D2	S1	0.65674	0.760532	0.701628	1.28391	1.251	0.999305	0.914482
			S2	0.717682	0.873074	1.60831	1.27915	1.41423	1.48973	0.924128
			S3	0.517572	0.815835	0.626852	0.877149	0.737819	0.503713	0.485186
			S4	0.507008	0.80998	0.906982	1.86741	1.24409	0.654752	0.756957
			S5	0.700433	0.702622	0.586944	0.844746	1.16431	0.778933	1.11715
			S6	0.640414	0.628795	0.464907	1.13449	0.733416	0.73735	1.30802
M1	R01	D3	S1	0.732805	0.559639	0.617764	0.751709	0.870276	0.653941	0.661559
			S2	1.09203	2.20514	1.36277	2.00916	1.58915	1.54154	2.19628
			S3	0.779386	0.918997	1.10695	1.09684	1.69695	1.15985	1.80695
			S4	1.16712	1.21921	2.14235	1.42876	3.11925	1.59803	2.97861
			S5	0.702922	1.25633	1.10155	0.826858	1.29712	1.25374	2.52271
			S6	0.846157	1.72368	1.89978	2.56346	3.60452	2.14037	2.68237
			S7	0.589993	0.530292	1.08219	1.12993	1.5429	1.22966	1.57207
			S8	0.465235	0.421382	0.577895	0.520828	0.799724	0.635959	0.66594
			S9	0.422249	0.648268	0.434236	0.711443	0.945273	0.538351	0.685082
			S10	0.434649	0.844248	0.798566	0.802774	1.44233	0.814502	0.625273
			S11	0.667185	1.19599	1.49973	1.05405	3.05611	1.8555	1.60827
M1	R02	D1	S1	0.683407	0.486919	0.661025	0.673798	0.368125	0.490874	0.540074
			S2	0.578925	0.681063	0.549984	0.469413	0.501979	0.405897	0.592648
			S3	0.265557	0.376525	0.469191	0.230775	0.224997	0.281852	0.328421
			S4	0.50896	0.456099	0.594927	0.569677	0.595898	0.427961	0.799006
			S5	0.619752	0.602472	0.76877	0.581252	0.603368	0.554065	0.627928
			S6	0.410822	0.592533	0.618357	0.733946	0.851131	0.434999	0.648945
			S7	0.483806	0.553034	0.746798	0.381483	0.508534	0.329751	0.378862
			S8	0.791068	0.646339	0.853876	0.94018	1.1667	0.84044	0.50123
			S9	0.511266	0.445159	0.369783	0.276666	0.323616	0.255829	0.371646
			S10	0.763273	0.806623	0.866587	0.957461	0.698841	0.613425	0.778569
			S11	0.571699	0.438316	0.437157	0.434741	0.30103	0.281374	0.444278
			S12	0.640013	0.373283	0.325801	0.385395	0.251385	0.200399	0.235563
			S13	0.496716	0.386876	0.489912	0.409688	0.351911	0.299867	0.352443
			S14	0.883096	1.12068	1.24884	1.0153	1.38179	0.699943	0.756343
			S15	0.518642	0.418018	0.437499	0.423408	0.323161	0.272265	0.435952
			S16	0.371279	0.228873	0.430241	0.446213	0.489305	0.3322	0.210361
			S17	0.540091	0.528227	0.654188	0.510212	0.493359	0.450656	0.615394
			S18	1.52626	1.6957	1.63081	1.53568	1.30261	1.341	2.54872
			S19	0.742606	0.670283	0.843464	0.695827	0.880241	0.399109	0.582926
			S20	1.06933	2.03437	1.32262	1.16913	1.42268	0.884191	1.42516
			S21	0.499932	0.723646	0.933985	0.752602	0.759019	0.647918	0.706786
			S22	0.749801	0.962457	0.957305	0.832041	1.01501	0.715561	0.729595
			S23	0.719848	0.783889	0.726141	0.619588	0.65434	0.574636	0.709171
			S24	0.708529	0.686848	0.601668	0.68478	0.532993	0.464685	0.77563
			S25	0.503666	0.696244	0.613069	0.460251	0.494794	0.384496	0.376019
M1	R02	D2	S1	0.330081	0.343369	0.243492	0.373131	0.458301	0.231641	0.294353
			S2	0.939604	0.526086	1.06094	1.12409	1.3275	1.02743	1.23611
			S3	0.912855	1.03579	1.26582	1.10762	1.47312	1.01144	1.22291
			S4	0.728638	0.930058	0.727634	0.922116	0.939817	0.865368	1.42402
			S5	0.589497	0.831119	0.567678	0.470401	0.514067	0.28743	0.69329
			S6	0.843105	0.846873	0.935617	1.19446	1.77324	0.745389	1.03652
			S7	1.10272	0.854763	0.917783	1.04341	1.59601	0.885821	1.0716
			S8	0.896451	1.23905	1.14054	1.31077	1.70599	0.882047	1.61794
			S9	1.7664	1.55027	1.57172	2.10629	1.96044	1.31291	2.79774
			S10	1.05968	0.874047	1.62504	1.56003	1.51051	2.216	1.58874
			S11	0.513736	1.34114	1.10246	1.10203	1.8075	1.34884	1.42316
			S12	0.807803	0.741728	0.764122	0.699508	0.726972	0.821704	0.84152
M1	R02	D3	S1	0.671769	0.813567	0.907727	0.828713	0.866284	0.784271	0.980115
			S2	1.10344	0.914644	0.939731	1.59429	0.90559	0.933114	1.1558
			S3	1.50855	1.26941	1.37853	1.3263	2.08219	1.26374	1.21224
			S4	2.22177	1.50972	1.87094	1.0319	1.77419	1.25587	1.04078
			S5	2.18464	1.97123	1.84607	2.50241	2.34337	2.29505	2.43979
M2	R01	D1	S1	1.33979	1.28397	1.38277	1.34751	2.34032	1.70808	1.34712
			S2	0.959172	1.46292	1.33708	1.81962	2.42834	2.43668	3.40653
			S3	1.12661	0.582213	1.29988	1.81394	2.25355	0.99786	2.13757
			S4	2.88586	2.65872	1.3812	0.900277	2.73143	1.96262	4.71955
			S5	1.83215	1.94066	1.47539	1.98062	1.32069	2.57557	2.56652
			S6	1.91056	1.57471	3.01303	1.43866	3.76268	2.39838	7.59064
M2	R01	D2	S1	1.35027	1.22781	1.3199	2.18171	1.44907	1.65929	2.11266
			S2	1.15508	1.70502	1.6683	2.11276	1.84014	1.72309	2.52068
			S3	1.0129	1.40207	1.60481	2.1939	2.28478	2.07821
			S4	1.31848	1.49075	1.60975	2.52461	2.4195	1.1311
			S5	1.03172	0.898163	1.39728	0.873474	2.42544	1.95875
			S6	1.28189	2.19625	1.15686	1.96732	0.77216	2.89109
			S7	1.69911	2.30017	2.12523	0.871657	1.47826	1.47605
M2	R01	D3	S1	0.982585	1.59204	1.25346	1.09705	2.18213	1.37848	5.10363
			S2	1.05139	1.40978	1.24898	1.04948	2.61274	1.15594	2.71183
			S3	1.31995	1.82586	1.54199	0.990281	1.92544	0.950465	1.3585
			S4	1.68386	2.07505	2.2153	2.28506	4.09927	2.54928	2.36258
			S5	1.06294	1.46797	1.93198	1.67932	2.89932	3.09293	2.86465
			S6	1.96955	1.95274	2.04803	2.14635	3.8657	2.04445	2.71921
			S7	1.39602	2.22393	1.96409	2.53758	2.69501	2.22807	3.38425
			S8	0.912666	1.62934	2.09441	1.91214	1.94865	0.925161	2.46285
M2	R01	D4	S1	1.58693	2.40787	2.06986	2.0179	2.80246	1.4813
			S2	2.00631	2.21765	1.88435	1.91238	5.64654	1.97503
			S3	1.73841	3.04561	2.91041	2.62144	3.70059	4.15053
			S4	1.66348	1.09568	0.905272	1.47952	1.88864	1.4183
			S5	1.79059	1.76944	2.0963	2.20343	5.32122	1.46242
			S6	1.56676	1.58443	1.73255	1.72718	3.27904	1.95932
			S7	1.72176	2.33184	1.3705	2.11498	1.42567	1.61	0.969188
			S8	0.687457	0.923907	0.892911	1.68298	1.74366	1.58524	2.26372
M2	R02	D1	S1	0.243931	0.518769	0.442499	0.405507	0.293457	0.25077	0.566647
			S2	0.211859	0.248853	0.334202	0.178488	0.233026	0.230806	0.549903
			S3	0.208975	0.313601	0.370565	0.245257	0.266695	0.214822	0.2828
			S4	0.413413	0.320742	0.239048	0.298961	0.201095	0.162306	0.294301
M3	R01	D1	S1	0.713109	0.933178	0.850164	1.03562	0.766405	0.92653	0.884449
			S2	0.817235	0.748571	0.757475	1.15227	0.789402	0.654517	0.990778
			S3	1.13385	0.99195	1.07558	1.01285	1.01997	1.04184	0.989607
			S4	1.01113	0.829752	1.2366	1.62484	0.97524	1.12509	1.54589
			S5	1.51954	1.50315	1.9998	1.33237	1.87525	1.76026	2.00092
			S6	2.69302	2.52664	3.45037	2.64499	2.83078	2.75812	3.98129
			S7	0.822733	0.622837	1.08682	1.24277	1.30538	1.67749	1.57602
			S8	1.31333	1.0371	1.0019	1.04224	0.746426	0.870692	1.12259
			S9	0.675017	0.845651		0.707329	0.683959	0.673049	0.934058
			S10	1.06393	0.835553	1.23255	1.22203	0.96637	0.787259	1.62397
			S11	0.894897	0.709577	0.392032	0.622643	0.495609	0.664682	0.682156
M3	R01	D2	S1	0.895085	0.973274	0.69347	1.033	1.0155	0.802258	0.893937
			S2	0.683715	0.644496	0.776154	0.711539	0.925191	0.624027	0.78255
			S3	0.790566	1.00395	0.933836	0.953932	1.39008	1.56262	1.44528
			S4	0.710119	0.779846	0.836615	0.716736	1.0031	1.12617	0.764485
			S5	0.804287	0.817964	0.84088	0.74341	0.730056	0.717732	1.02098
			S6	0.865968	0.760036	1.19876	1.18132	1.46575	0.640405	1.32304
			S7	1.28007	1.40477	1.70838	1.38563	1.91899	1.42814	1.86566
			S8	2.35988	2.79454	3.0222	2.00104	2.95759	1.92466	2.87347
			S9	1.59759	0.747497	1.77739	1.19846	1.22381	1.02687	1.09255
			S10	1.15653	0.731863	1.3234	1.00637	1.1019	1.19071	1.37872
			S11	0.801407	0.751999	1.12115	0.929735	2.03852	0.822748	1.17501
			S12	1.05077	1.05384	1.125	1.13053	1.457	0.941507	1.07144
			S13	0.948001	0.835036	1.02489	1.02178	1.1783	1.00714	1.06112
			S14	0.745193	0.975199	0.746255	0.733097	0.634248	0.876073	1.3486
			S15	0.548087	0.622678	0.696463	0.601897	0.806194	0.595517	0.753365
			S16	1.5073	1.44123	1.42598	1.55378	1.55542		2.26702
			S17	1.32069	1.08137	0.891297	0.930389	0.824739	1.42842	0.967701
			S18	1.58374	0.628859	0.925085	1.34646	1.07039	0.803864	1.4562
			S19	1.14435	0.955582	1.33189	1.12394	1.22133	0.997059	1.24357
			S20	0.497024	0.261935	0.540742	0.266648	0.597766	0.579506	0.741584
			S21	0.385434	0.358948	0.327433	0.290282	0.496994	0.358173	0.476056
			S22	1.43775	1.26717	2.30324	2.14063	2.6229	2.83551	2.25489
			S23	0.646438	0.848441	0.732877	0.695522	1.35805	0.596042	0.941389
			S24	0.847708	1.08547	1.00495	0.876943	0.874731	0.772592	0.780938
M3	R01	D3	S1	1.42778	1.82117	1.67059	1.42456	1.83984	1.66852	2.64089
			S2	1.31095	1.40382	1.13096	1.0623	1.57519	1.38735	1.83021
			S3	0.775072	0.712473	0.817402	0.413446	0.86697	1.09153	1.23209
			S4	1.11413	0.907058	0.914822	0.895633	0.994368	0.976973	0.940151
			S5	1.93227	2.02859	1.01824	1.54095	1.97562	2.06491	3.01718
			S6	1.80736	0.839144	0.723804	1.36339	1.19441	1.59937	1.78556
			S7	1.42462	1.36166	1.8142	1.27348	1.75741	1.49179	2.62365
			S8	2.31381	2.24201	2.66319	3.25944	2.78102	3.07414	3.74237
			S9	1.75927	2.06712	2.19288	1.68389	2.26272	2.17937	6.28315
			S10	1.92681	2.02179	1.38198	2.1208	1.94025	2.03456	3.29163
			S11	0.722304	0.880388	0.858582	0.519799	0.707647	1.23779	1.21715
			S12	0.750518	0.948962	1.2534	1.03308	1.1415	0.979333	1.85999
			S13	1.69512	2.38296	1.58872	1.54232	1.41006	1.73958	1.79784
			S14	1.17675	1.23668	0.920499	0.7004	1.01234	1.72295	1.37807
			S15	1.6488	0.912061	1.06418	1.21035	1.4708	1.19143	1.39468
			S16	1.5761	1.14571	1.24362	0.864262	0.864716	1.37244	1.68959
M4	R01	D1	S1	0.329339	0.46267	0.353472	0.395777	0.358995	0.476402	0.428451
			S2	0.806252	0.553652	0.847517	0.600917	0.971841	0.560166	0.526737
			S3	0.48445	0.589757	0.603405	0.675142	1.03789	0.449508	1.00564
			S4	0.52816	0.631371	0.910065	0.774141	0.632222	0.935	0.82572
			S5	0.861494	0.817254	0.884554	1.35854	1.21457	1.18673	0.964623
			S6	0.391179	0.418549	0.596663	0.36611	0.417809	0.475888	0.2962
			S7	0.985106	0.947926	1.09536	1.16515	0.801965	0.890941	0.944863
			S8	0.870765	0.36765	0.580665	0.678325	0.814404	0.62189	0.493634
			S9	0.732029	0.812596	0.796753	0.875215	0.639244	0.824641	0.771916
			S10	0.393186	0.285525	0.491537	0.438256	0.439163	0.663992	0.537423
			S11	0.871047	0.637196	0.733812	0.957327	0.874989	0.713712	0.867994
			S12	0.590965	0.65895	0.74072	0.681053	0.597429	0.637363	1.10687
			S13	0.459608	0.40479	0.749354	0.822298	0.497252	0.650851	0.434452
			S14	0.623658	0.549947	0.99415	1.03167	0.862639	0.902467	0.926936
			S15	0.537883	0.31485	0.638559	0.34944	0.391496	0.66211	0.442589
			S16	0.693394	0.692774	0.740022	1.00441	0.545592	0.654055	0.754981
			S17	0.325748	0.263728	0.224374	0.234309	0.217784	0.515444	0.38961
M4	R01	D2	S1	0.762218	1.02173	0.707377	0.82786	0.662707	0.894895	0.901112
			S2	0.573457	0.564101	0.795588	0.573063	0.69722	0.673575	0.842685
			S3	0.593613	0.619612	0.73436	0.343233	0.430884	0.397635	1.16558
			S4	0.902578	1.08513	1.17239	0.696843	0.92027	1.38044	2.04361
			S5	0.711347	0.785665	0.493548	0.502972	0.405595	0.792623	0.42798
			S6	0.550374	0.618776	0.343392	0.466071	0.351605	0.687694	0.350716
			S7	0.573952	0.464369	0.753806	0.506955	0.44404	0.681234	0.542138
			S8	0.730292	0.688869	1.00991	0.445153	0.532713	0.887943	0.532394
			S9	0.419817	0.508817	0.333357	0.254009	0.379147	0.462326	0.404338
M4	R02	D1	S1	0.303974	0.262372	0.248999	0.440521	0.497782	0.450306	0.329203
			S2	0.381852	0.319832	0.409733	0.49312	0.519716	0.510843	0.66826
			S3	0.309202	0.402474	0.368182	0.26642	0.314504	0.418215	0.473909
			S4	0.535994	0.631433	0.635666	0.51254	0.392747	0.402613	0.779981
			S5	0.507567	0.54486	0.472287	0.286476	0.376258	0.480071	0.696969
			S6	0.302309	0.263976	0.334719	0.496004	0.41173	0.585015	0.710606
			S7	0.203121	0.283991	0.0856425	0.226911	0.167869	0.206661	0.194123
			S8	0.631327	0.512578	0.562141	0.483032	0.510907	0.338124	0.701304
			S9	0.528687	0.470536	0.883452	0.527268	0.946555	0.488751	0.753975
			S10	0.424055	0.413499	0.507231	0.342653	0.626169	0.497753	0.411978
			S11	0.488812	0.366585	0.234665	0.360821	0.388272	0.29705	0.448065
			S12	0.307513	0.351861	0.466842	0.339719	0.482133	0.53013	0.378704
			S13	0.61675	0.656646	0.314075	0.568472	0.43819	0.393548	0.461801
			S14	0.599987	0.240702	0.435702	0.37448	0.391957	0.462188	0.301193
			S15	0.566501	0.52738	0.452335	0.642884	0.682172	1.0803	1.08675
			S16	0.431107	0.416634	0.474843	0.352171	0.277924	0.527279	0.306978
			S17	0.445715	0.485349	0.659474	0.41785	0.32682	0.416208	0.695953
			S18	0.367181	0.426447	0.542135	0.940855	0.593483	0.436725	0.455805
			S19	0.494967	0.434429	0.537983	0.720918	0.621485	0.588475	0.843511
M4	R02	D2	S1	0.178415	0.203424	0.301535	0.269633	0.287138	0.296679	0.690751
			S2	0.412559	0.241932	0.337832	0.430723	0.33778	0.337906	0.609621
			S3	0.442596	0.488621	0.640914	0.516599	0.361346	0.598455	0.425696
			S4	0.267988	0.194483	0.233336	0.303618	0.277271	0.565456	0.293059
			S5	0.275318	0.416326	0.459234	0.33951	0.290796	0.337838	0.34335
			S6	0.194345	0.179286	0.258856	0.278558	0.277375	0.353135	0.265352
			S7	0.241321	0.259796	0.192939	0.37262	0.354484	0.257032	0.497505
			S8	0.288126	0.363397	0.301478	0.334424	0.325434	0.303387	0.447695
			S9	0.596008	0.476275	0.627728	0.522282	0.512439	0.479124	0.7808
			S10	0.138748	0.149504	0.17652	0.29497	0.173459	0.225264	0.306916
			S11	0.549624	0.522256	0.612113	0.504959	0.649949	0.689192	0.993873
			S12	0.598681	0.6355	0.646048	0.785869	0.601756	0.68835	0.730087
			S13	0.5351	0.364531	0.318885	0.510199	0.42026	0.574401	0.637522
			S14	0.377692	0.403149	0.412428	0.319285	0.33107	0.437252	0.781238
			S15	0.29786	0.205811	0.212311	0.25118	0.256157	0.215962	0.33212
M4	R02	D3	S1	0.503665	0.383517	0.461189	0.510221	0.404579	0.437145	0.500364
			S2	0.613473	0.609591	0.796628	0.554767	0.710752	0.588214	0.695584
			S3	0.347416	0.217289	0.225943	0.269836	0.320709	0.502402	0.307682
			S4	0.779657	0.255192	0.411905	0.415337	0.441189	0.542184	0.417157
			S5	0.276714	0.197211	0.429344	0.240616	0.23081	0.196333	0.366454
			S6	0.785222	0.551618	0.606826	0.387252	0.954547	0.580346	0.682591
			S7	0.513673	0.413292	0.44799	0.487886	0.612959	0.82305	0.533911
			S8	0.626952	0.306903	0.837641	0.542485	0.592864	0.811098	1.20838
			S9	0.53672	0.54194	0.42415	0.463916	0.610534	0.601818	0.997463
			S10	0.694015	0.691951	0.474177	0.540816	0.44564	0.585593	0.56675
			S11	0.475688	0.395709	0.505725	0.762156	0.654534	0.417484	0.427734
			S12	0.749817	0.621409	0.528677	0.479267	0.678593	0.644368	0.666798
			S13	1.0397	0.570057	0.816034	0.627115	0.697485	0.727094	0.913527
			S14	0.660649	0.657961	0.734352	0.585236	0.85985	0.529603	0.641345
M4	R02	D4	S1	0.423586	0.414054	0.429935	0.46264	0.549824	0.57767	0.581044
			S2	0.705911	0.357961	0.411473	0.636969	0.776241	0.53312	0.414692
			S3	0.367639	0.352527	0.646164	0.691373	0.431751	0.351791	0.49085
			S4	0.640904	0.433262	0.493225	0.605048	0.584226	0.50558	0.643829
			S5	0.365704	0.317935	0.603986	0.506524	0.446881	0.603364	0.567771
			S6	0.835115	0.801596	1.2238	0.773039	1.23537	1.55712	1.04312
			S7	0.852958	0.953472	1.32316	0.844102	0.979092	0.644615	1.25993
			S8	0.31518	0.463035	0.536268	0.623507	0.681791	0.270897	0.568947
			S9	0.530919	0.53473	0.38717	0.889879	0.484775	0.684862	0.602951
			S10	0.244937	0.568612	0.32106	0.485454	0.532917	0.340968	0.629934
			S11	0.501602	0.541972	0.589609	0.464915	0.590983	0.423957	0.563432
			S12	0.667757	0.367047	0.88207	0.459371	0.71193	0.646682	0.799981
			S13	0.465113	0.399507	0.445257	0.455186	0.405548	0.442279	0.553853
			S14	0.390353	0.406579	0.655421	0.344333	0.525735	0.457672	0.554321
			S15	0.225638	0.368183	0.403303	0.307737	0.417049	0.431147	0.441593
			S16	0.402752	0.253151	0.446458	0.262176	0.367281	0.436135	0.354648
M5	R01	D1	S1	0.410696	0.407827	0.622806	0.431083	0.404252	0.588124	0.472318
			S2	0.577757	0.896716	0.632463	0.841004	0.705273	1.01946	0.60292
			S3	0.756469	0.583114	0.750429	0.906382	0.471186	0.750452	0.740394
			S4	1.20959	0.944629	0.719397	0.851303	0.788176	1.19336	1.28568
			S5	0.653125	0.856342	0.785517	1.0654	0.78401	0.860845	0.957969
			S6	1.05735	1.12801	0.997718	1.19426	1.26456	1.17325	1.45406
			S7	1.17207	1.24735	1.45424	1.30437	1.67055	1.27438	2.70304
			S8	0.864266	0.691769	0.614872	0.71398	0.780102	0.989396	1.4679
			S9	1.17003	1.30975	1.38673	1.42836	1.34412	1.18548	1.07985
			S10	0.594306	1.31194	0.860258	1.0069	0.932187	1.5471	0.764628
			S11	0.489147	0.968204	1.22858	0.876716	0.915151	1.37061	1.11411
			S12	0.645243	0.413845	0.67953	1.04244	0.913914	1.5296	0.77733
			S13	0.883815	1.07376	0.74457	0.826999	1.08081	0.830598	1.66082
			S14	0.347459	0.930857	0.537262	0.876731	0.667456	0.613841	0.664158
			S15	1.25347	1.0091	1.08072	1.12747	1.63511	1.01186	1.69241
			S16	0.65432	0.419129	0.916933	0.839259	0.637115	0.421272	0.683083
			S17	0.652336	0.640477	0.542539	0.55049	0.850576	0.999402	0.675827
			S18	0.687979	0.697446	0.44646	0.756951	0.740871	0.517503	0.388543
			S19	0.642706	0.979615	0.900011	1.33512	0.900067	0.74758	0.880961
M5	R01	D2	S1	0.311521	0.259424	0.381488	0.514339	0.470375	0.61179	0.371035
			S2	0.736259	0.507437	0.758123	0.454051	1.1369	1.33269	0.540233
			S3	1.05047	0.647619	0.699098	0.559651	1.23077	1.73386	1.26498
			S4	0.574	0.713228	0.624157	0.383438	0.598595	0.889444	0.610715
			S5	1.13789	0.71139	0.931781	0.9717	1.33004	1.14651	1.62714
			S6	0.994876	0.829772	1.25465	1.49793	1.7418	1.55434	1.13281
			S7	0.474749	0.387739	0.590968	0.37629	0.442655	0.651753	1.02869
			S8	0.810862	0.506288	0.976769	1.62046	1.25966	1.64055	1.59646
			S9	0.641276	0.478276	0.834851	0.978539	0.912751	0.959073	0.846791
			S10	0.492417	0.421294	0.905906	0.667752	0.715144	1.02585	0.29487
			S11	0.887811	0.557088	1.1359	1.07185	0.692848	0.88814	0.798006
			S12	0.980514	1.09318	1.03572	1.30246	1.64888	1.37416	1.23072
			S13	1.65734	1.5455	1.68677	3.20774	2.64675	3.11604	2.17183
			S14	2.67967	1.91047	2.32324	3.20572	3.65968	3.35567	3.19479
			S15	3.16244	3.33177	3.8566	3.88154	4.56026	4.79599	3.12247
			S16	0.931785	1.04434	1.41441	1.06947	0.968518	0.688751	0.902317
			S17	0.918539	1.0447	1.23087	1.53428	1.27178	2.26738	2.32
			S18	1.4748	1.56813	2.73089	1.23817	1.77204	2.32484	2.18262
			S19	1.53191	1.48801	1.38382	1.51567	2.45523	2.62966	2.08435
			S20	0.901382	0.623097	0.661584	1.34633	1.47935	1.72914	2.01039
			S21	1.12259	1.49526	0.952306	1.66863	1.60896	1.51523	1.16885
			S22	1.00178	1.70185	1.17967	1.26225	1.25459	1.36332	1.24445
			S23	0.606989	1.01379	0.952643	0.9467	0.76819	1.03542	1.25935
			S24	1.23639	0.772495	0.950357	0.825146	0.846488	1.15059	1.24746
			S25	0.473956	0.571528	0.765813	1.02511	0.677443	1.19801	0.709771
			S26	0.470828	0.482004	0.94865	1.36424	1.3672	1.16635	1.3472
			S27	0.268289	0.725908	0.496109	1.44985	0.908218	0.971774	0.94024
			S28	0.469006	0.766668	0.775753	0.806391	0.571312	0.823456	0.879665
			S29	0.909517	1.19843	0.899712	0.924223	0.961847	1.20262	1.71656
			S30	0.488696	0.580203	0.604851	1.11233	1.57532	0.527134	0.899663
			S31	0.457576	0.560442	0.631141	0.749058	1.04869	0.677173	2.48239
			S32	0.741729	0.501049	0.735387	1.49554	0.776268	0.986298	1.62215
M5	R01	D3	S1	0.168831	0.396297	0.542017	0.4589	0.453491	0.564123	0.743977
			S2	0.4746	0.394682	0.636145	1.09643	0.792189	1.07923	1.02942
			S3	0.923761	0.90178	0.781638	1.18699	0.953398	2.34632	1.48732
			S4	0.425973	0.349969	0.284562	0.932697	0.464489	0.591179	0.92565
			S5	0.557876	0.305056	0.44691	0.583762	0.595118	0.739733	0.871002
			S6	1.1785	0.764248	0.697917	1.02066	1.03006	1.58615	1.32024
			S7	1.4989	1.12711	1.50658	1.08339	1.14771	2.16154	2.77521
			S8	0.603737	0.507024	0.721588	0.856314	0.527056	0.909196	1.57847
			S9	0.898163	1.06312	0.838539	0.927033	1.28774	1.33741	2.12813
			S10	0.695976	0.680036	0.686881	0.795871	0.831449	0.771081	0.965234
			S11	0.845452	0.66049	1.02021	1.48989	1.48925	1.07978	2.07528
			S12	0.71151	0.454159	0.781191	0.377532	0.574623	0.832607	0.858689
			S13	0.913002	0.679652	0.885405	0.903608	1.0688	1.16233	1.171
			S14	0.641329	0.579949	0.539674	0.749086	0.619983	0.862204	2.17852
			S15	0.561433	0.531959	0.388765	0.513599	0.669725	0.889115	1.77038
			S16	0.699976	0.653676	0.795363	0.984927	0.529711	1.27771	2.35341
M5	R02	D1	S1	0.326379	0.270515	0.359305	0.489593	0.346747	0.368562	0.480784
			S2	0.240378	0.208749	0.175596	0.182996	0.187323	0.205477	0.208126
			S3	0.265149	0.327438	0.353401	0.262623	0.279839	0.351925	0.284591
			S4	0.295267	0.274666	0.306464	0.280452	0.221098	0.232882	0.200347
			S5	0.379107	0.269139	0.250572	0.273673	0.278918	0.288437	0.448387
			S6	0.166104	0.0928289	0.162179	0.147392	0.209656	0.15938	0.313274
			S7	0.637447	0.635816	0.755859	0.519462	0.468632	0.807747	1.13709
			S8	0.405152	0.40974	0.574906	0.448797	0.39755	0.772647	0.797855
			S9	0.647872	0.436369	0.432541	0.496736	0.453752	0.474814	0.818988
			S10	0.259293	0.268042	0.156825	0.432229	0.178385	0.351349	0.33126
			S11	0.244895	0.238273	0.214943	0.289878	0.243118	0.400063	0.351979
			S12	0.234405	0.166935	0.385619	0.350203	0.235685	0.56715	0.502068
			S13	0.216001	0.249842	0.187365	0.29288	0.23863	0.294861	0.456347
			S14	0.242661	0.163751	0.266504	0.289855	0.204515	0.259397	0.171912
			S15	0.368887	0.200408	0.314231	0.245608	0.267984	0.244588	0.355624
			S16	0.145617	0.161345	0.287166	0.210987	0.22786	0.299838	0.290756
			S17	0.221937	0.180697	0.202518	0.286218	0.169256	0.171141	0.274643
			S18	0.153938	0.223401	0.17136	0.150401	0.121359	0.119798	0.175438
M5	R02	D2	S1	0.426201	0.464517	0.37965	0.433992	0.410678	0.485713	0.595512
			S2	0.692882	0.549008	0.653206	0.95784	0.667638	0.74236	0.73954
			S3	0.462839	0.425259	0.56083	0.941148	1.41915	0.486696	1.42005
			S4	0.606825	0.631687	0.963197	0.820229	0.648237	0.439411	1.03258
			S5	0.935186	0.88349	1.25806	1.14872	0.800092	0.901094	1.42387
			S6	0.56309	0.418139	0.719678	0.908528	0.639159	0.776482	1.13306
			S7	0.29031	0.20347	0.21463	0.517907	0.262327	0.343889	0.298074
			S8	0.818259	0.4694	0.427978	0.810681	0.707552	0.723218	0.679528
			S9	0.488309	0.333848	0.50812	0.39577	0.421242	0.471554	0.411842
M5	R03	D1	S1	0.192829	0.237558	0.197802	0.222057	0.254282	0.158415	0.265938
			S2	0.229005	0.187099	0.268432	0.272906	0.309807	0.164704	0.266939
			S3	0.479137	0.418591	0.561433	0.361668	0.376477	0.492452	0.916115
			S4	0.495544	0.771743	0.466602	0.685748	0.532904	0.498508	0.85535
			S5	0.858949	0.82177	0.509896	0.779269	0.695119	0.923441	1.05205
			S6	0.890711	1.03621	0.918079	1.44763	0.915871	1.11873	1.48244
			S7	0.668209	1.03476	0.882894	1.1337	1.23907	0.937382	1.22235
			S8	0.747792	0.919951	1.06947	0.871678	0.932942	0.619836	1.26145
			S9	0.736292	0.982502	1.15882	1.53203	1.14567	0.842472	1.4549
			S10	0.970127	1.22023	0.733105	1.46473	1.11233	1.44259	1.3071
			S11	1.10067	1.07665	1.49227	2.44664	0.935783	1.09099	1.46714
			S12	1.00023	0.591217	0.952876	1.09307	0.870341	0.900049	0.90026
			S13	0.695054	0.887847	1.19218	0.977216	1.03255	0.698619	1.72275
			S14	1.19236	1.57021	2.55389	1.8863	3.32774	1.60274	2.33465
			S15	0.272227	0.513707	0.459601	0.699573	0.239993	0.282539	0.70613
			S16	0.403497	0.647424	0.702825	0.889255	0.993895	0.861592	0.864585
			S17	1.1274	0.962739	0.984103	1.15252	1.3132	1.58608	1.19802
			S18	1.26204	0.642019	0.767522	1.53098	0.731405	0.884271	2.80574
			S19	0.724027	0.328131	0.465658	0.647294	1.19361	0.70418	1.24268
			S20	0.877168	1.08566	1.13367	0.672978	0.853102	0.761873	1.02122
			S21	0.469406	0.373821	0.686453	0.898936	0.607051	0.686342	0.843272
			S22	0.780011	1.25814	0.967443	1.60971	0.849968	1.1437	2.45019
			S23	0.467415	0.583275	0.537986	0.703	0.551433	0.656055	0.392028
			S24	0.459351	0.542227	0.533147	0.722319	0.729062	0.701423	0.954824
			S25	0.36935	0.403761	0.695827	1.05364	0.65499	0.553235	0.296669
			S26	0.577157	0.861605	0.257439	1.21881	0.553059	0.458886	0.332088
			S27	0.381931	0.417176	0.314892	0.782913	0.306369	0.283252	0.917449
			S28	0.642353	0.899989	0.765864	0.664867	0.59451	0.498959	0.5187
			S29	0.965266	0.768639	0.410961	0.895483	0.669516	0.774245	0.440699
M5	R03	D2	S1	0.107282	0.225895	0.240544	0.221872	0.170156	0.234186	0.268973
			S2	0.654724	0.289882	0.456337	0.249447	0.363002	0.358805	0.310241
			S3	0.350067	0.183178	0.144065	0.172397	0.342939	0.377093	0.327219
			S4	0.45375	0.567547	0.611634	0.446422	0.629775	0.632814	0.772975
			S5	1.02186	0.822072	0.636911	0.58591	0.685111	0.888036	1.05266
			S6	0.944791	1.3328	1.26888	1.32179	0.67161	1.04049	0.773517
			S7	0.637965	0.185135	0.291931	0.242476	0.356287	0.211581	0.42737
			S8	0.615551	0.849537	0.534425	1.04707	0.556943	1.02072	0.765577
			S9	0.937297	0.914455	0.741394	1.57442	0.878715	1.25004	0.975553
			S10	0.825159	0.751267	0.611184	0.54479	1.34812	0.914221	0.640255
			S11	0.474018	0.949664	1.74874	1.26075	0.71843	1.08692	1.03275
			S12	1.29464	2.06487	2.08533	1.72082	2.20859	2.47175	1.3659
			S13	0.438493	0.716745	0.646646	0.533915	1.16996	0.590568	0.436646
			S14	0.723416	0.921685	0.99917	0.908973	0.683602	0.887018	1.03239
			S15	0.232846	0.304157	0.200439	0.484947	0.443264	0.322325	0.607114
			S16	0.344773	0.372536	0.612349	0.496749	0.513211	0.481085	0.368145
			S17	0.168764	0.13242	0.172371	0.341945	0.20165	0.201251	0.659407
			S18	1.28836	0.776657	1.11423	0.537111	1.82252	1.27101	0.552298
			S19	1.26223	1.16938	1.04276	0.664976	0.72971	0.761147	0.718219
M5	R03	D3	S1	1.44611	1.03767	0.850992	0.805315	0.778198	1.85956	1.11325
			S2	0.759894	0.311889	0.392742	0.484034	0.312625	0.935667	0.202863
			S3	0.64852	0.814903	0.850088	0.65773	0.991255	1.34715	0.729346
			S4	0.665512	0.585274	0.726427	0.373521	0.807606	0.932778	0.950617
			S5	0.739099	0.721938	0.786903	0.773853	0.797551	0.571698	1.0347
			S6	0.25944	0.196557	0.252263	0.356933	0.269835	0.426346	0.400568
			S7	0.694903	0.554487	0.629073	0.430238	0.476721	1.09746	0.504294
			S8	0.914256	0.509753	0.56503	0.46781	0.476433	0.830111	0.662933
			S9	0.198675	0.723875	0.480898	0.439465	0.297839	0.384876	0.443704
			S10	0.310189	0.512285	0.302341	0.601087	0.425688	0.743722	0.790354
			S11	0.279495	0.258888	0.161171	0.423698	0.219948	0.179805	0.272813
			S12	0.334935	0.238585	0.181221	0.236831	0.27871	0.234648	0.360272
			S13	0.396587	0.329245	0.478916	0.195688	0.256947	0.313965	0.326223
M5	R03	D4	S1	0.385151	0.326568	0.26804	0.369116	0.325962	0.34115	0.641479
			S2	0.471436	0.703166	0.525674	0.761957	0.651514	0.602265	0.729779
			S3	0.180072	0.233751	0.171394	0.181838	0.156458	0.206287	0.306291
			S4	0.373409	0.238577	0.540331	0.269788	0.608132	0.366527	0.385426
			S5	0.646292	0.643666	0.727739	0.748938	0.614318	0.749672	0.794648
			S6	0.867666	1.13777	0.820938	0.8409	0.611039	0.73891	1.18512
			S7	0.599934	0.464764	0.588877	0.46675	0.332833	0.589403	0.601991
			S8	0.697037	0.596894	0.579157	0.669088	0.481813	1.13441	0.569359
			S9	1.08966	1.25627	1.22215	1.86209	0.905703	1.58456	1.76262
			S10	0.430531	0.447234	0.6466	0.386281	0.418663	0.706009	0.548784
			S11	0.943561	0.637328	0.936923	0.55398	0.627176	0.824446	1.25518
			S12	0.258965	0.369625	0.297957	0.744278	0.30413	0.337373	1.48705
			S13	0.899762	0.716415	0.665041	0.859009	0.557974	0.758756	0.653273
			S14	0.64837	0.701857	0.686594	0.67594	0.564217	0.801907	0.610403
			S15	0.249831	0.273646	0.151131	0.555717	0.176082	0.335059	0.484669
M5	R03	D1	S1	0.394433	0.217107	0.395236	0.275308	0.476651	0.254937	0.855056
			S2	0.45407	0.648406	0.0228736	0.313239	0.516213	1.43056	1.32478
			S3	0.683438	0.485658	1.04591	0.827076	0.902403	0.695113	1.4351
			S4	0.511234	0.449222	0.574674	0.378684	0.434936	1.537	0.635762
			S5	0.582372	0.474355	1.10923	0.546889	0.373926	1.04124	1.3191
M5	R04	D1	S1	0.351007	0.526869	0.469038	0.418526	0.465993	0.633234	0.447329
			S2	0.42891	0.468002	0.485901	0.748668	0.395825	0.955892	0.467992
			S3	0.886468	0.898161	0.68398	0.667416	0.790544	1.1293	1.07439
			S4	0.529159	0.909633	0.690936	0.99829	0.897058	0.571062	1.20284
			S5	0.3387	0.492751	0.468496	0.218516	0.411817	1.07962	0.71869
			S6	0.886404	1.32726	1.22055	1.28598	1.66438	1.33021	1.65107
			S7	0.456139	0.772684	0.676334	0.977299	0.75057	0.992455	0.639319
			S8	0.802885	0.877879	0.984012	1.4969	1.23861	0.938548	0.977006
			S9	0.81251	1.04648	0.623997	0.781801	0.681777	0.825785	1.27759
			S10	1.01395	1.06331	1.37145	0.795813	1.01873	0.980846	1.35908
			S11	0.573252	1.08276	0.795904	0.910961	0.840146	1.36761	1.31244
			S12	0.90447	1.09756	0.836725	0.61532	0.639174	1.10424	0.690284
			S13	0.699959	0.68883	0.758198	1.05565	0.845142	0.99116	0.67088
			S14	0.631959	0.666168	0.792633	0.906142	1.17152	1.07444	0.824691
			S15	0.307068	0.529364	0.538678	0.480495	0.530975	0.574793	0.979732
			S16	0.62911	0.829894	0.954206	0.599364	0.560183	0.771816	1.19092
			S17	0.562558	0.730549	0.563245	0.603365	0.498161	0.794225	0.878103
			S18	0.699888	1.05502	1.20865	0.675791	1.10448	1.45682	1.33612
			S19	0.468164	0.666286	0.924692	1.53535	0.914817	0.849218	0.93746
			S20	0.956886	1.20294	1.75941	1.01928	1.13772	1.22772	1.31311
			S21	0.841569	1.34778	1.78761	1.01185	1.36004	1.48631	1.26641
M5	R04	D2	S1	0.635274	0.952407	0.907888	0.666687	0.932405	1.03561	1.11465
			S2	0.88716	0.881202	1.29283	0.725883	1.10081	1.01256	1.33654
			S3	2.0946	2.23282	1.58638	2.09567	3.1581	1.60338	5.20009
			S4	0.89051	1.19835	0.932696	0.890471	1.26706	0.794145	1.54392
			S5	0.935979	0.926208	0.65281	0.741608	1.15126	0.75125	1.23661
			S6	0.631664	0.668212	0.623442	0.500909	0.411958	0.539457	0.649654
			S7	1.18507	1.08196	0.860937	0.943211	0.972756	1.51126	2.20249
			S8	1.08678	1.39305	1.41938	1.12633	1.16408	1.06267	1.92196
			S9	2.06248	3.33141	2.52412	2.22936	2.22458	4.00479	2.66795
M6	R01	D1	S1	0.23324	0.318414	0.227447	0.249106	0.29811	0.554807	0.224918
			S2	0.300942	0.325979	0.342615	0.449336	0.313781	0.32264	0.281808
			S3	0.250295	0.405394	0.203377	0.495457	0.266026	0.313458	0.23938
			S4	0.441064	0.416626	0.28999	0.41897	0.416275	0.377925	0.331416
			S5	0.344702	0.292005	0.268468	0.283965	0.246825	0.307263	0.519678
			S6	0.931825	1.46797	1.65647	1.24504	1.27178	1.253	1.89572
			S7	0.426024	0.415756	0.279824	0.54326	0.368635	0.380868	0.369525
			S8	0.663591	0.630682	0.441307	0.785368	0.583407	0.549937	0.429627
M6	R01	D2	S1	0.222355	0.234845	0.0570343	0.299735	0.163731	0.167103	0.245914
			S2	0.252345	0.198879	0.107126	0.289538	0.201307	0.239017	0.203961
			S3	0.250598	0.275401	0.161988	0.258181	0.239512	0.241124	0.232286
			S4	0.242038	0.314929	0.262943	0.29461	0.261667	0.292177	0.2757
			S5	0.594541	0.514078	0.545351	0.317534	0.441678	0.640387	0.538249
			S6	0.339377	0.422331	0.355442	0.347645	0.405939	0.408408	0.233991
			S7	0.177237	0.192718	0.0941326	0.188277	0.18237	0.196921	0.185012
			S8	0.379002	0.311784	0.26944	0.349612	0.296086		0.217269
			S9	0.0369005	0.0866342	0.0560705	0.101925	0.143024	0.157917	0.0753842
M6	R02	D1	S1	0.244565	0.299011	0.247773	0.19787	0.173253	0.190915	0.304928
			S2	0.23808	0.128347	0.207562	0.2844	0.256334	0.155603	0.144888
			S3	0.24318	0.168549	0.232041	0.243071	0.364103	0.175908	0.237775
			S4	0.288814	0.256226	0.278129	0.239059	0.388724	0.323633	0.257206
			S5	0.439701	0.436292	0.275895	0.418758	0.432621	0.266671	0.340555
			S6	0.216017	0.111057	0.20041	0.155832	0.146916	0.185828	0.219809
			S7	0.504572	0.684972	0.607326	0.307148	0.41379	0.560012	0.45107
			S8	0.230193	0.212715	0.144337	0.176577	0.16011	0.194373	0.141091
			S9	0.5182	0.536699	0.483644	0.45814	0.570121	0.446657	0.515182
			S10	0.256575	0.453447	0.340717	0.499959	0.364727	0.357073	0.322742
			S11	0.30844	0.447385	0.332959	0.271077	0.389887	0.337296	0.341611
			S12	0.240667	0.25271	0.280528	0.150459	0.413017	0.26462	0.213366
			S13	0.338368	0.329429	0.302344	0.282541	0.423306	0.159076	0.240531
			S14	0.106459	0.0611851	0.178914	0.187739	0.105103	0.137371	0.12113
			S15	0.122713	0.14572	0.109202	0.137348	0.125834	0.168415	0.167744
			S16	0.236556	0.148782	0.154793	0.135326	0.147262	0.165719	0.14915
			S17	0.20756	0.214508	0.215923	0.270864	0.223912	0.206653	0.330841
			S18	0.659758	0.552768	0.448974	0.527358	0.553478	0.428587	0.547838
			S19	0.468118	0.317323	0.270058	0.33248	0.636236	0.312021	0.310601
			S20	0.259354	0.230667	0.201608	0.258921	0.266286	0.299625	0.204484
			S21	0.2369	0.160432	0.199884	0.232843	0.159379	0.252145	0.197098
M6	R03	D1	S1	0.152665	0.154165	0.137863	0.170694	0.0994703	0.15356	0.175002
			S2	0.207693	0.243068	0.206818	0.182093	0.144102	0.175031	0.187926
			S3	0.192185	0.178799		0.192739	0.133775	0.186281	0.156168
			S4	0.129775	0.156789	0.190163	0.182449	0.147604	0.155595	0.17012
			S5	0.297902	0.241799	0.25471	0.429106		0.302409	0.192612
			S6	0.202147	0.208494	0.177243	0.152123	0.171719	0.180489	0.140951
			S7	0.190065	0.159149		0.243922	0.255071	0.295987	0.208535
			S8	0.256905	0.210003	0.399744	0.341085	0.226059	0.197497	0.211887
			S9	0.153391	0.117611	0.213559	0.169427	0.171534	0.294297	0.150981
			S10	0.245447	0.338507	0.213088	0.259349	0.25163	0.319204	0.189102
			S11	0.466889	0.404606	0.413659	0.310632	0.335574	0.47092	0.432097
			S12	0.191577	0.205178	0.169581	0.1351	0.229298	0.155734	0.167504
			S13	0.420779	0.33131	0.34057	0.447013	0.322092	0.482155	0.280896
			S14	0.468191	0.5571	0.223685	0.37527	0.555519	0.637907	0.488342
			S15	0.358302	0.361747	0.356031	0.447259	0.356475	0.317157	0.329065
			S16	0.296499	0.123334	0.286451	0.302807	0.331685	0.252791	0.160943
			S17	0.255133	0.248211	0.156858	0.208792	0.245655	0.197804	0.260898
			S18	0.129256	0.129338	0.107506	0.121653	0.185653	0.216537	0.166699
			S19	0.198142	0.120316	0.150374	0.171225	0.160886	0.10468	0.171648
			S20	0.135408		0.142903	0.168121	0.137029	0.188148	0.107443
			S21	0.448775	0.36435	0.498637	0.503621	0.342407	0.405789	0.4542
			S22		0.376277	0.458423	0.467166	0.395199	0.442842	0.572405
			S23		0.380785	0.28695	0.46679	0.278723	0.353205	0.46668
			S24	0.2119	0.135121	0.139892	0.169277	0.144639	0.31802	0.141089
M6	R03	D2	S1	0.209066	0.161993	0.0581832	0.198467	0.112184	0.175609	0.155813
			S2	0.234653	0.234127	0.363658	0.284785	0.209366	0.227205	0.228634
			S3	0.0694354			0.0746432	0.119469	0.151347	0.0771627
			S4	0.226114	0.187312		0.211612	0.202563	0.192519	0.223875
			S5	0.155824	0.111408		0.199775	0.153828	0.112802	0.165911
			S6	0.31784	0.386526		0.265762	0.248882	0.351391	0.277653
			S7	0.254431	0.223342		0.286661	0.32016	0.304356	0.245003
			S8	0.163177	0.161192		0.242039	0.207003	0.218691	0.220309
			S9	0.191009	0.240407	0.213025	0.13887	0.223051	0.230261	0.197113
			S10	0.427698	0.150019	0.493484	0.310801	0.312966	0.256041	0.256557
			S11	0.422097	0.265147		0.289499	0.472586	0.31762	0.321871
			S12	0.392093	0.22985		0.479289	0.530374	0.448737	0.376455
			S13	0.38371	0.384836		0.48379	0.72056	0.448292	0.535064
			S14	0.375193	0.400119		0.35239	0.496238	0.402835	0.582609
			S15	0.354365	0.628406		0.916708	0.936771	1.19454	0.824304
			S16	0.350467	0.293094		0.30188	0.29868	0.410859	0.302886
			S17	0.46866	0.330572		0.415429	0.404887	0.603463	0.397218
			S18	0.290523	0.321505		0.360448	0.275771	0.34931	0.319737
			S19	0.229367	0.262555	0.323671	0.163819	0.220633	0.247855	0.232963
			S20		0.335022	0.269905	0.161631	0.191629	0.329766	0.323442
			S21	0.205566	0.337014		0.169513	0.207024	0.248201	0.180912
			S22	0.314843	0.158653		0.170002	0.258739	0.278007	0.191576
			S23	0.23748	0.16424		0.147115	0.232879	0.289103	0.126926
M6	R03	D3	S1	0.181315	0.205058	0.180207	0.152451	0.184096	0.13843	0.14418
			S2	0.209082	0.241778	0.273949	0.300936	0.303867	0.217861	0.297344
			S3	0.277721	0.273892	0.268994	0.287383	0.290018	0.256741	0.259629
			S4	0.206467	0.307532	0.202359	0.344122	0.325755	0.275462	0.264449
			S5	0.250494	0.161565	0.168123		0.218018	0.177681	0.1379
			S6	0.238757	0.211584	0.186706	0.245613	0.257476	0.196725	0.238284
			S7	0.219302	0.180209	0.1963	0.219082	0.2068	0.169297	0.164658
			S8	0.329003	0.304508	0.332344	0.362391	0.322779	0.384196	0.303483
			S9	0.172573	0.154844	0.229375	0.207494	0.167577	0.192692	0.144933
			S10	0.143735	0.241346	0.300046	0.206931	0.229473	0.205109	0.222617
			S11	0.111652	0.168032	0.315676	0.21804	0.233001	0.237115	0.183462
			S12	0.263768	0.170325	0.21005	0.256701	0.238037	0.252266	0.209048
			S13	0.178152	0.220028	0.260008	0.207537	0.190159	0.284419	0.202823
			S14	0.504257	0.43631	0.58038	0.563657	0.68284	0.693367	0.582886
			S15	0.326609	0.295407	0.221279	0.30646	0.346752	0.339658	0.306616
			S16	0.196103	0.21896	0.165463	0.206399	0.180802	0.173099	0.172355
			S17	0.140314	0.123406	0.162591	0.22526	0.155352	0.147836	0.101241
			S18	0.108265	0.169606	0.182155	0.192038	0.165192	0.205732	0.16597
			S19	0.147069	0.0982047	0.186063	0.138772	0.242376	0.198574	0.150418
			S20	0.113817	0.103636	0.119626	0.200118	0.187707	0.093264	0.0959631
			S21	0.367327	0.302579	0.360422	0.353213	0.308576	0.325822	0.325836
			S22	0.169195	0.152534	0.0961735	0.137183	0.236382	0.147052	0.0986563
			S23	0.40581	0.273771	0.366551	0.310975	0.273168	0.384345	0.427925
			S24	0.255014	0.200471	0.209209	0.242507	0.259304	0.218422	0.171001
M6	R03	D4	S1	0.208276	0.230663	0.200278	0.351689	0.329331	0.238623	0.262579
			S2	0.217985	0.322074	0.271964	0.273284	0.264206	0.223971	0.284599
			S3	0.272105	0.338089	0.336362	0.747355	0.320866	0.27787	0.321232
			S4	0.243632		0.44557	0.545329	0.32948	0.304609	0.311491
			S5	0.178468	0.250016	0.143339	0.292653	0.292993	0.269139	0.3568
			S6	0.392996	0.478475	0.495101	0.599374	0.578699	0.69833	0.712024
			S7	0.250874	0.321296	0.108271	0.292697	0.512293	0.238084	0.198176
			S8	0.203989	0.209686	0.17886	0.224262	0.192653	0.306236	0.218837
			S9	0.11963	0.176694	0.259377	0.143205	0.229316	0.124181	0.313795
			S10	0.27	0.303645	0.310114	0.210042	0.370979	0.299828	0.259748
			S11	0.151467	0.270617	0.30787	0.288915	0.205296	0.240928	0.254996
			S12	0.186599	0.258498	0.312282	0.312169	0.175994	0.185237	0.211312
			S13	0.0947068	0.174847	0.188023	0.105591	0.166169	0.150533	0.117105
			S14	0.503888	0.55217	0.473018	0.465342	0.598191	0.379922	0.572943
			S15	0.29324	0.269523	0.336448	0.391996	0.344565	0.191424	0.267824
			S16	0.32646	0.296144	0.289147	0.289348	0.307638	0.263952	0.302686
			S17	0.437	0.397253	0.402906	0.475304	0.580248	0.339254	0.527458
			S18	0.335307	0.374578	0.272211	0.32089	0.274458	0.279152	0.290184
			S19	0.190771	0.297062	0.427805	0.311224	0.287366	0.200141	0.324765
			S20	0.341818	0.196563	0.284947	0.239976	0.22212	0.238158	0.242318
			S21	0.279348	0.165161	0.132301	0.442573	0.3253	0.271761	0.290253
M6	R03	D5	S1	0.175836	0.230072	0.22112	0.203282	0.298324	0.239647	0.182046
			S2	0.242586	0.231893	0.288238	0.293177	0.306189	0.307508	0.282078
			S3	0.330023	0.205154	0.324768	0.383155	0.253284	0.334742	0.352454
			S4	0.320663	0.363455	0.330147	0.257212	0.40069	0.311657	0.274336
			S5	0.244327	0.186022	0.239086	0.262564	0.22003	0.277688	0.205132
			S6	0.287472	0.294726	0.272693	0.276091	0.241281	0.265924	0.252952
			S7	0.156349	0.155402	0.121997	0.159333	0.150019	0.120467	0.175982
			S8	0.17688	0.14942	0.171623	0.216913	0.158036	0.146754	0.18378

## Sheet: VD-V1-L5 apical dendrites
				BL1	BL2	BL3	VD1	VD2	VD3	VD7
Mouse ID	ROI	Dendrite ID	Spine ID
M1	R01	D1	S1	0.923559	0.997103	2.06616	1.18729	2.04497	0.879463	2.78304
			S2	0.49484	1.32233	0.955383	0.848142	2.09376	0.881931	2.13291
			S3	0.464685	0.470556	0.684237	0.696127	1.19631	1.45886	0.413098
			S4	1.30757	1.87201	2.175	1.86185	2.247	3.09895	2.21204
			S5	2.1494	1.88182	2.71742	2.41766	2.79863	2.81501	2.79794
			S6	1.13724	1.2812	0.788876	0.736965	0.553309	0.809242	0.847117
			S7	2.42608	1.4384	2.47238	1.56526	1.12419	1.50045	1.89224
			S1	0.532318	0.476506	0.64218	0.745498	0.586362	0.520481	0.638214
			S2	1.30564	0.901762	0.870098	0.738077	1.0864	0.945862	0.54007
			S3	1.39344	1.26675	0.746218	1.59297	0.895602	1.10671	1.19287
			S4	1.65311	1.79545	1.57474	1.79558	1.69235	1.55466	1.84667
			S5	3.04723	1.53031	2.33744	2.59621	2.43737	1.97076	2.46788
M1	R02	D1	S1	0.785224	0.984563	1.0713	0.650559	0.645694	0.982047	0.591637
			S2	3.2837	0.595038	2.74734	1.63382	3.1655	1.22294	1.03166
			S3	1.33224	0.748129	0.510509	1.00708	0.995405	0.72552	0.619562
			S4	1.94204	1.20508	1.74988	0.640675	1.34943	0.515071	0.640641
			S5	1.47596	1.40616	1.67424	1.31889	1.69958	1.09074	2.1995
			S6	1.43378	1.192	1.11948	0.980982	0.95074	1.30661	0.745241
			S7	0.538176	0.475193	0.477079	0.276581	0.370434	0.471247	0.341221
M1	R02	D2	S1	1.84655	1.37182	1.77733	1.11515	0.961066	1.25134	0.927774
			S2	4.24864	2.05866	1.18284	1.85285	2.57746	0.984939	4.06243
			S3	2.37692	0.652178	2.15321	1.95094	4.44525	2.15564	2.00216
			S4	1.75085	1.11411	1.88073	2.02422	1.90316	1.83441	2.26069
			S5	2.98227	1.77908	2.5311	3.06789	1.61917	5.53557	3.35423
			S6	3.46557	2.42191	2.74199	0.906956	1.22993	2.22395	1.68558
			S7	2.18004	1.6328	1.4598	1.71496	1.3397	1.51851	1.50967
			S8	1.95585	2.34931	3.06986	1.23248	2.48696	2.75651	2.67407
M1	R02	D3	S1	0.473579	1.28671	0.771355	0.693231	0.654742	0.694451	0.465451
			S2	1.73942	0.665612	0.970184	0.420154	0.387493	0.756983	0.664288
			S3	0.851934	1.06476	0.69901	0.859599	0.890269	0.929118	1.03831
			S4	1.55206	0.227024	1.04549	1.14798	1.22143	1.4294	0.436618
			S5	1.27164	0.956533	0.595675	0.69276	0.922038	0.632719	0.726629
			S6	0.948189	0.267478	0.757151	0.330929	0.258423	0.605592	0.666479
M1	R03	D1	S1	1.09517	1.74615	3.6706	1.89017	1.06544	1.16741	1.48744
			S2	0.775729	0.84456	0.594221	0.509178	0.448441	0.374662	0.402971
			S3	1.53475		1.14248	0.985271	0.92937	1.23389	1.21455
M1	R03	D2	S1	2.28422	2.54293	1.91851	1.28647	1.26509	0.736252	2.00469
			S2	1.57848	1.95446	1.44154	1.4212	1.08474	1.90689	2.32324
			S3	1.19765	1.13997	0.871685	1.8416	1.09669	2.21732	1.05913
M2	R01	D1	S1	3.16047	2.06363	3.42338	1.64896	2.27444	3.22357	1.60075
			S2	1.06596	2.46145	0.907925	1.55941	1.49436	2.37242	1.30272
			S3	7.13129	7.2014	9.5089	6.70933	6.80424	8.52286	5.47453
			S4	4.714	1.94717	1.52411	1.3504	1.97509	1.66132	0.684508
			S5	1.09385		1.45415	0.740296	1.18765	0.407681	0.838053
			S6	3.39035	2.87106	2.89672	2.33786	2.23307	2.30062	2.73329
			S7	1.64736	2.11998	1.14268	1.72129	1.32872	2.69314	1.44782
			S8	0.727315	1.18493	1.41218	0.914149	1.13318	0.968809	1.50778
M3	R01	D1	S1	0.840322	1.01184	2.4951	0.891325	2.18061	1.87767	2.59093
			S2	3.43631	2.00066	2.1531	2.24308	2.50981	2.12716	2.00246
			S3	0.571765	0.681898	0.71135	0.945818	1.42581	1.02946	1.72372
			S4	4.79916	8.10859	5.18744	6.81224	11.3017	2.47225	2.56752
M3	R01	D2	S1	6.23595	4.98481	5.43022	6.93746	6.92745	8.60122	10.0962
			S2	2.54816	1.48054	2.64753	1.41263	1.46746	1.401	3.48946
			S3	3.81706	3.77315	1.96714	3.55408	1.99864	4.12882	4.17284
			S4	2.95224	2.30518	1.72466	1.36726	2.12042	2.86783	4.53805
			S5	1.65022	1.10672	1.51937	1.00808	0.83951	1.02112	1.77828
			S6	5.5878	6.23777	5.19227	4.93422	5.51547	7.33396	10.0358
			S7	6.78467	5.81285	5.24971	4.98493	2.92549	6.68706	6.18165
			S8	0.521217	0.575298	0.548491	0.621241	0.826062	0.720829	0.691826
			S9	5.10784	3.85369	3.8385	2.47884	3.74277	3.18027	3.71598
M3	R01	D3	S1	1.1413	0.885463	1.21593	1.27029	1.1472	1.17333	1.30592
			S2	1.66377	1.13485	1.35896	1.36074	1.53859	1.13007	0.673732
			S3	0.747235	0.421079	0.606371	0.540025	0.794069	0.592477	1.25096
			S4	1.45531	1.22907	1.41002	1.15392	0.989057	0.932759	1.43884
			S5	1.00551	1.29731	1.58483	1.17435	0.825711	0.673673	1.43977
			S6	0.324259	0.718866	0.362996	0.275261	0.453261	0.323556	0.489612
			S7	0.703375	0.402261	0.832834	0.831506	0.871717	0.389268	1.19312
			S8	0.517911	0.32673	0.385216	0.645721	0.444446	0.570479	0.464455
			S9	0.936399	0.530664	0.483888	0.621389	0.817855	0.741103	0.983945
			S10	0.790014	0.822653	0.795014	0.707325	1.10509	0.871206	1.42177
M3	R02	D1	S1	3.52588	2.12305	2.3576	2.24366	3.118	5.18743	2.31384
			S2	1.80115	3.16081	2.56048	3.03728	2.56253	2.77535	2.80054
			S3	3.47366	4.22868	3.60527	3.68225	3.20393	3.8544	5.59044
			S4	4.54442	4.87768	6.26757	4.56696	7.03006	2.6084	5.16511
			S5	2.84287	3.00104	3.12723	4.55123	4.12178	5.14566	7.91072
			S6	7.35613	6.56973	7.67195	4.57377	8.73459	12.2931	12.5687
			S7	2.46368	2.54109	1.4524	2.10119	1.0865	1.53284	3.40329
			S8	9.27823	8.02557	6.49391	7.95794	8.42028	24.6726	9.73732
M3	R02	D2	S1	2.46865	2.03105	1.88052	1.52254	1.77701	1.89351	1.95105
			S2	2.36281	2.36589	2.02836	1.49387	1.95901	1.91876	3.75497
			S3	1.00126	0.528866	0.540243	0.788485	0.744838	1.32012	1.12852
			S4	4.31543	2.20705	2.27039	1.89894	2.69446	4.78596	4.30355
			S5	1.89655	1.89721	2.63137	2.12256	2.3028	2.2528	2.20615
			S6	1.46495	1.58341	1.30323	2.02067	1.68592	1.63385	1.97743
			S7	0.941565	0.540493	0.523223	1.04962	0.762556	1.50828	0.767482
M3	R02	D3	S1	1.6086	1.98976	2.10695	1.68344	2.23006	3.15548	3.45082
			S2	0.8507	0.832215	0.895124	0.72871	0.886774	1.25672	1.33713
			S3	1.12468	1.62346	0.912745	1.29058	1.74731	1.11757	1.26999
			S4	1.55242	1.72557	1.25747	1.20871	1.74479	2.00273	1.83281
			S5	2.33455	3.90563	2.27688	1.94771	2.66776	1.9037	4.01379
			S6	3.07979	2.49926	3.0131	2.82149	3.11148	4.65999	1.96307
			S7	1.3655	0.874959	1.12834	0.631675	0.994461	0.970418	0.8159
			S8	2.98574	1.98665	1.47409	1.65008	3.30054	2.65704	2.44715
			S9	2.2634	1.77086	2.32813	1.81785	1.66896	1.62019	1.84394
			S10	1.31151	0.866535	0.481204	1.67206	2.0995	2.26903	2.37574
			S11	2.59507	2.13472	2.66858	2.29003	2.5459	2.6365	2.27255
			S12	2.04991	2.15235	1.12694	1.29198	1.73529	4.76331	1.75937
M3	R02	D4	S1	2.27512	1.41168	1.6877	1.30005	1.22831	2.22752	2.0211
			S2	3.43478	2.14822	3.019	2.19008	3.08001	3.01716	2.49834
			S3	5.18397	3.49038	3.45306	1.98832	2.62954	3.03089	3.85047
			S4	8.67349	6.89242	8.62986	12.1042	10.5995	8.90306	9.14001
			S5	6.91677	4.71676	5.90404	4.60589	4.63941	3.79987	4.44115
			S6	3.74012	2.38334	2.54848	3.23132	3.08241	3.2463	6.1184
			S7	7.47857	5.38056	4.36083	5.8933	5.56775	4.26325	4.27475
			S8	4.40933	4.13421	3.27664	2.65236	2.83059	3.45373	2.22687
			S9	1.79294	1.39834	1.58635	1.75293	1.62575	1.822	1.48298
			S10	4.14256	4.44055	2.90279	2.6091	4.11693	3.34097	2.69224
			S11	9.38666	5.09854	6.98268	7.39911	9.72692	8.24922	7.05774
			S12	5.68913	4.77586	5.39283	4.35812	3.64382	6.73444	3.5924
M3	R02	D5	S1	2.40609	1.8794	2.08788	2.64242	3.05441	2.22359	2.44073
			S2	2.09797	1.8363	1.69782	1.52535		0.93723	1.55207
			S3	3.1485	4.59759	5.664	2.96145	3.29951	3.20693	2.49291
M3	R02	D6	S1	9.33568	11.8732	13.7824	11.3463	10.2906	8.60815	7.3336
			S2	7.54602	4.64731	8.54309	6.12428	7.59508	7.03764	6.59627
			S3	5.44845	6.78649	5.1042	4.79687	7.21114	5.40892	10.2547
			S4	4.57382	7.61479	5.78035	3.71394	7.20646	5.46679	3.89442
			S5	1.89716	2.36291	1.94581	2.15061	4.78247	4.23851	1.60381
M3	R03	D1	S1	0.810585	0.570501	0.61935	0.479339	0.306449	0.37593	0.557441
			S2	1.45304	2.16714	1.24818	2.04696	2.62932	2.6204	1.70892
			S3	0.794548	0.78909	1.10728	0.302028	0.846064	2.10739	1.14869
			S4	0.43833	0.695932	0.841681	0.448976	0.915333	1.30179	0.627129
			S5	0.783497	0.558711	0.868512	0.34426	0.765802	1.4774	0.793085
			S6	1.06129	2.0499	1.15411	1.10214	2.39564	1.67319	1.78727
			S7	1.00569	1.9465	0.831318	0.716863	1.68841	1.04118	2.1235
			S8	1.40687	1.27438	0.590652	0.663319	0.641256	0.486197	0.625707
			S9	3.15548	2.08368	3.04994	2.49303	3.08618	3.28744	1.51823
			S10	1.50835	1.33938	1.46803	2.24061	2.20512	2.08461	2.67334
			S11	0.726803	0.530043	0.395283	0.51065	1.23772	0.659522	0.99005
M3	R03	D2	S1	1.68842	1.65429	1.12287	1.09474	1.70162	1.38999	1.41992
			S2	0.638896	0.929898	0.570488	0.522807	0.729144	0.61784	0.499527
			S3	0.487823	0.504703	0.366373	0.392165	0.377886	0.37533	0.22621
			S4	0.299102	0.53743	0.365852	0.759018	0.509639	0.44754	0.280928
			S5	0.322973	0.557213	0.378211	0.600157	0.368729	0.490628	0.601018
			S6	1.82606	1.8086	1.09203	0.99074	1.47483	2.17292	1.79673
			S7	1.01125	1.6742	0.993636	0.913732	0.939247	0.937899	0.838144
			S8	0.717294	0.678877	0.470548	0.548142	0.295509	0.876157	0.489761
			S9	1.31243	1.45215	2.08332	2.08659	1.86857	1.92137	2.52312
			S10	2.29812	1.80683	2.21711	3.036	0.754059	2.75999	3.68768
			S11	1.16527	0.786134	0.986831	1.10159	0.273399	1.45856	1.49969
			S12	1.72766	1.96868	1.9072	1.65867	1.31456	2.2825	3.1797
			S13	0.509822	0.541403	0.39501	0.617668	0.343258	0.446416	0.944426
			S14	0.502378	0.364493	0.460767	0.709351	0.689973	0.673005	0.363552
			S15	1.19618	0.93621	1.44658	1.43175	0.76011	1.09009	1.21276
			S16	1.71915	1.30627	1.837	1.24178	1.11174	2.1277	0.828941
M3	R03	D3	S1	3.77819	5.00966	4.68508	2.2685	3.46296	4.1747	2.65734
			S2	1.16867	1.41632	0.584314	1.02691	1.03038	1.00861	1.23015
			S3	3.40991	2.65275	4.20753	3.21945	4.9631	5.22975	3.46274
			S4	0.635043	0.47259	1.23916	0.419617	1.30651	0.903891	1.32956
			S5	1.66399	1.40385	1.99616	2.29989	3.2573	2.48416	3.17801
			S6	3.34488	3.4006	2.30431	2.19986	2.93265	4.97784	4.80638
			S7	1.97954	2.79441	1.8492	1.77753	2.67516	4.29344	5.50262
			S8	0.914652	0.989891	1.23866	0.731456	1.01946	1.24747	1.16059
M3	R03	D4	S1	3.90885	5.84849	4.19359	5.90002	5.82575	8.12278	7.3774
			S2	0.315282	0.554573	0.96383	0.404164	0.320645	0.821772	1.08042
			S3	3.83667	2.82447	1.66727	2.73893	3.01791	3.25476	5.36711
			S4	5.09365	5.2365	2.22779	4.2901	4.71726	7.42739	7.30779
			S5	3.70695	7.23476	4.11077	3.16018	3.79831	1.638	3.78628
			S6	3.29075	1.89509	1.93319	2.0062	4.01988	2.38217	3.26035
M3	R04	D1	S1	1.423	1.38573	1.32422	2.37724	2.23832	1.812	2.08873
			S2	0.757467	1.05778	1.06235	0.519531	0.656263	0.772328	1.57289
			S3	2.14969	1.96499	1.57475	2.63431	2.37631	1.54804	2.23081
			S4	0.429619	0.785843	0.906642	0.57727	0.668865	0.719646	0.724624
			S5	0.665812	0.641242	0.416261	0.355746	0.867079	1.29173	0.830443
			S6	2.3362	2.10261	1.05416	1.23199	1.64619	1.39388	1.63834
			S7	1.53807	1.58304	1.77174	1.48931	2.32452	1.88076	0.986906
			S8	0.882231	1.06383	0.909525	1.07101	1.02011	1.21273	0.606512
			S9	0.819917	0.780996	0.804861	0.825848	1.08831	1.10622	1.42995
			S10	1.59198	1.20035	1.03605	1.36033	1.51122	1.74221	1.69353
			S11	1.58678	1.55395	1.92235	1.45876	1.91534	1.87308	1.60805
			S12	0.520995	0.378914	0.500532	0.646926	0.921757	0.46947	0.868377
			S13	1.39451	1.4323	2.04375	1.39534	2.398	1.73576	1.78908
			S14	0.495033	0.368221	0.782174	0.611401	0.700614	0.672858	0.966025
			S15	2.37534	1.93764	1.42773	1.54529	1.8631	1.6864	1.84041
			S16	1.46115	1.85687	0.999079	0.89178	2.3312		1.02762
			S17	1.60998	1.41082	1.43554	1.69088	1.61969	1.60889	1.52004
			S18	1.30681	0.845772	0.730541	0.986415	1.08541	0.656408	0.700462
M3	R04	D2	S1	0.588253	0.770514	0.298331	1.30111	1.11984	0.915918	1.00089
			S2	1.52049	1.35823	1.02509	1.89824	1.10211	0.578001	1.09281
			S3	2.02602	3.35598	1.78797	2.00263	2.17573	2.6812	1.71292
			S4	0.95328	0.784011	1.02107	1.43885	1.24791	0.997113	1.00561
			S5	0.717279	0.841002	0.943176	0.641197	1.0949	0.945322	1.22475
			S6	0.893277	0.792583	1.12973	0.703006	1.17794	1.04132	1.00482
			S7	0.8772	0.688631	0.730017	0.508688	0.645886	1.00234	1.29539
			S8	0.735185	1.15642	1.75896	1.4128	1.17809	1.12171	1.21985
			S9	2.2812	1.28593	1.51194	2.3193	2.32286	2.82011	3.228
M3	R04	D3	S1	1.25092	1.48735	0.786663	1.03046	1.1727	1.30125	0.747264
			S2	0.799042	1.73435	0.929006	0.32268	0.699862	0.899749	0.93512
			S3	2.40904	2.73755	2.09189	1.91063	2.98465	3.34924	2.30562
			S4	4.09067	3.29692	3.97112	3.24912	4.5726	3.13457	2.25274
			S5	4.30267	4.7464		2.50774	5.79031	4.21453	1.58964
			S6	1.75617	1.21947	1.20854	1.44431	1.9283	1.29409	1.19455
			S7	2.21138	3.16758	2.02163	3.11777	3.4436	6.23237	2.90967
			S8	3.45258	2.69187	1.67283	3.23708	2.60463	2.98698	3.56275
			S9	6.29483	3.1749	4.69338	3.17313	4.41159	4.82382	4.24837
			S10	2.07894	4.05404	2.41638	1.87692	2.62621	1.84245	1.19919
			S11	2.64206	2.52075	1.59775	1.54021	2.20838	1.96861	2.26586
			S12	4.82333	2.98379	3.61419	4.99337	6.14296	5.26561	3.69894
			S13	5.27593	6.31999	5.76628	5.29756	5.42039	7.37444	4.27725
			S14	2.25169	1.64244	1.48413	2.06186	2.02532	1.26391	1.0674
M4	R01	D1	S1	2.45561	2.98381	2.70966	1.93643	1.87253	3.08487	3.03684
			S2	5.07489	5.03917	4.26574	4.05658	3.52198	5.09303	4.79183
			S3	1.46517	1.14821	1.31623	0.646216	0.824682	1.24121	1.19669
			S4	2.7037	3.04298	2.56472	3.00205	2.1305	1.71241	1.65149
			S5	2.2362	1.5986	1.25708	1.54565	1.95702	2.88105	1.9794
			S6	0.825088	1.17661	0.607718	0.925927	0.838938	1.04716	1.158
			S7	2.39712	2.05576	1.5611	1.71364	1.56435	3.04063	2.53536
			S8	4.33358	3.44935	3.40511	3.32343	3.20292	3.62175	3.98293
			S9	0.906336	0.462837	0.630496	0.85451	1.01243	1.35203	1.94074
M4	R01	D2	S1	3.58446	3.69557	2.64422	2.02118	2.92863	1.07606	2.72338
			S2	4.26946	2.76254	2.31787	2.59127	2.77079	2.50174	4.49607
			S3	5.65409	4.29588	1.82854	1.23081	1.86608	0.672993	3.36773
			S4	1.62715	2.27537	2.02106	1.33143	1.46535	3.77095	2.13573
			S5	3.20573	1.7864	1.6646	2.50241	1.61852	0.999163
			S6	2.46761	2.60346	1.95417	1.4791	2.20028	2.2082	6.15846
			S7	2.95461	1.03629	1.32827	0.77843	1.03655	1.65494	1.53062
M4	R02	D1	S1	2.94971	1.63511	3.38693	1.90558	2.15632	2.72578	3.56315
			S2	0.855567	1.09009	1.222	1.15466	1.55274	2.26617	1.77775
			S3	1.72132	1.41152	1.2523	1.41627	1.39125		2.07772
			S4	3.6392	1.91644	1.944	3.23308	2.81728	3.92534	3.38399
			S5	1.9605	1.88775	1.02516	1.23335	1.27702	2.50433	1.6141
			S6	1.47909	1.13698	1.34149	1.69443	2.03297	1.99445	1.8632
			S7	0.61407	0.931589	0.637707	1.09353	1.2913	1.92657	1.29386
			S8	2.65214	2.559	2.63422	2.67907	2.30215	4.14467	5.19766
			S9	1.24975	1.37935	0.810955	1.31638	0.827355	1.53392	1.58823
			S10	2.26686	1.8616	1.46201	1.06914	1.65192	2.74959	1.5801
			S11	1.65053	1.16145	1.46605	2.11268	2.09142		2.1462
M4	R02	D2	S1	4.21627	5.45794	3.52341	4.26611	2.69391	7.57901	2.23466
			S2	2.40244	1.75803	1.587	0.87841	1.92652	1.36574	1.08603
			S3	1.98403	4.59081	3.41393	3.08942	4.02434	3.0301	5.35467
			S4	2.719	3.00116	1.65548	2.69753	2.78957	1.98772	2.51429
			S5	7.86834	5.24596	5.55962	5.10263	7.70728	5.21796	6.41349
M4	R03	D1	S1	0.842873	0.59485	0.431694	0.370568	0.374488	0.840315	0.339392
			S2	3.57149	3.5596	3.80493	5.96017	2.21338	2.28208	5.60903
			S3	2.47828	1.58999	1.79123	1.95856	1.2317	1.84024	2.01026
			S4	2.84173	1.71743	1.43406	1.74134	1.80134	4.51052	1.50645
M4	R03	D2	S1	1.07462	0.823908	1.4674	0.532303	0.723604	1.18352	0.981218
			S2	1.07371	1.12135	1.19247	0.820169	1.10698	1.89879	0.840213
			S3	0.278755	0.294927	0.299037	0.198497	0.234347	0.41215	0.391127
			S4	0.748553	0.876607	0.775583	0.9521	0.672323	0.461138	0.833871
			S5	1.17912	1.28121	1.33011	0.761745	0.931423	1.37785	1.27788
			S6	2.91215	1.17739	1.60197	1.22946	1.03678	1.49272	1.31122
			S7	1.52172	3.05416	1.93562	1.48149	1.6945	1.94615	1.55223
			S8	1.15024	1.71887	1.6401	1.23427	1.05757	2.61309	2.13421
			S9	3.27461	1.66952	1.89564	1.66798	1.46242	3.62227	2.59963
			S10	2.89782	3.49426	3.13897	2.22626	1.81329	3.67248	1.78304
			S11	1.95456	1.00947	1.68683	1.32975	1.47466	1.96418	1.13611
			S12	3.60082	2.99761	2.14089	2.00883	2.7902	2.98054	3.51504
			S13	1.7934	1.83759	1.4062	0.809282	1.29949	2.24564	1.97766
M4	R03	D3	S1	1.34676	1.2868	1.60552	1.09923	0.670593	1.26967	0.963188
			S2	4.48255	3.4442	3.05404	3.07018	3.75357	6.18382	5.27546
			S3	1.24164	1.61877	1.36923	1.01643	1.23783	2.00348	2.01114
			S4	4.24103	2.69429	2.27626	2.09402	2.95729	3.10822	3.06871
			S5	3.16195	2.593	2.66289	2.68864	2.41054	2.66723	3.69668
			S6	1.33813	1.14413	0.678165	0.426495	0.319442	0.643942	0.599499
			S7	1.00528	0.87388	0.893676	0.702482	0.588947	0.375632	0.882567
			S8	1.55367	1.92984	1.44375	1.06566	0.981543	2.0163	2.1824
			S9	2.77863	1.73426	1.78656	1.45994	1.06147	2.03308	2.47776
M4	R04	D1	S1	0.962176	0.945185	1.00257	0.823529	0.449609	0.819629	0.768266
			S2	1.78695	1.17013	1.60483	1.19554	0.758743	1.84839	1.09237
			S3	0.950828	0.728851	0.91029	0.690815	0.514547	0.954135	0.80779
			S4	2.09732	2.10922	1.8342	1.37772	1.04539	2.79671	2.68419
			S5	1.55812	1.85568	1.84821	2.46694	2.76652	3.02346	2.16797
			S6	0.897302	1.24462	1.59513	1.1724	1.18803	2.04192	1.37976
			S7	1.47272	1.97286	1.65481	1.95665	1.49969	2.08686	2.38411
			S8	0.80092	0.622991	0.67801	0.332252	0.470478	0.624656	0.591594
			S9	1.66845	2.3079	2.46581	2.65222	1.66702	2.49737	2.1254
M4	R04	D2	S1	1.2419	0.985363	1.4795	0.798777	1.01754	1.21033	1.74005
			S2	0.692392	1.23625	0.542395	1.10613	0.859266	0.715304
			S3	1.5937	1.56531	1.07813	1.077	0.619592	1.04919
			S4	2.23383	1.94758	2.04026	2.17446	1.9377	1.51478	1.35922
			S5	1.83788	3.41254	3.19658	3.14472	1.7754	1.22902	0.755747
			S6	1.40486	1.38662	1.93777	1.79577	1.85499	1.65208	1.64486
			S7	0.659811	1.39072	1.20386	0.505717	0.928801	1.58074	1.52199
			S8	1.62619	2.79728	1.93254	2.27623	2.56177	1.86161	3.74024
M4	R04	D3	S1	1.72147	1.56831	1.72627	0.647927	1.91954	1.68718	1.39233
			S2	2.36333	2.50428	2.56101	2.1601	2.71708	2.53025	3.01839
			S3	2.30881	2.00301	1.58374	1.80496	1.69568	1.96052	2.53351
			S4	1.84294	1.42614	1.2252	1.23351	0.958899	1.33244	0.761286
			S5	1.20096	0.980661	1.35964	1.00399	1.15189	1.4748	1.11501
			S6	0.881075	0.779192	0.789745	0.892572	0.331065	1.04999	0.828021
			S7	0.238983	0.244139	0.197634	0.23111	0.157826	0.349127	0.238072
			S8	0.361693	0.338376	0.546377	0.196011	0.208473	0.330952	0.394463
M4	R04	D4	S1	0.910154	2.99148	2.02499	2.40291	2.27048	1.82563	2.7035
			S2	1.74411	2.17151	1.17833	1.86747	2.13545	1.91031	3.13758
			S3	0.566835	0.377435	0.550845	0.625359	0.749988	1.00527	0.510633
			S4	1.9685	1.35448	1.73051	1.17122	1.49152	2.18258	1.19559

## Sheet: VD-V1-L23 apical dendr-GRIP1KO
				BL1	BL2	BL3	VD1	VD2	VD3	VD7
Mouse ID	ROI	Dendrite ID	Spine ID
M1	R01	D1	S1	0.498661	0.530377	0.407613	0.414265	0.477806	0.392927	0.401257
			S2	0.550079	0.748583	0.629608	0.754584	0.798146	0.602198	0.658414
			S3	0.228766	0.122961	0.190867	0.147174	0.170405		0.208881
			S4	0.550622	0.370921	0.456129	0.518533	0.473342	0.285129	0.36914
			S5	0.479287	0.574481	0.14046	0.441424	0.458289	0.351783	0.292664
			S6	0.129768	0.255388	0.204127	0.17947	0.310222	0.264461	0.224826
			S7	0.301671	0.273586	0.184829	0.171387	0.169651	0.147861	0.272123
			S8	0.225186	0.556351	0.306562	0.51769	0.412285	0.534954	0.452927
			S9	0.737437	0.83334	0.827894	1.00057	0.759661	0.708565	0.868227
			S10	0.43509	0.468383	0.555216	0.559865	0.405677	0.54465	0.575512
			S11	0.691652	1.0575	1.36467	1.23209	1.13073	0.832528	0.65682
			S12	0.203077	0.371774	0.281979	0.435879	0.255756	0.410714	0.248524
M1	R01	D2	S1	0.441226	0.293085	0.155422	0.478861	0.177056	0.134074	0.170021
			S2	0.333167	0.331142	0.328055	0.355566	0.229761	0.37279	0.349021
			S3	0.288928	0.187603	0.254779	0.304157	0.303679	0.26683	0.40032
			S4	0.20944	0.180181	0.155957	0.305054	0.267677	0.219334	0.314814
			S5	0.146899	0.0953442	0.0597014	0.135628	0.0959135	0.101008	0.169534
			S6	0.135531	0.118464	0.249824	0.113396	0.243618	0.148283	0.1458
			S7	0.602837	0.581899	0.568338	0.803287	0.893951	0.590113	0.636507
			S8	0.516568	0.311468	0.333217	0.414463	0.613149	0.361978	0.46442
			S9	1.55498	0.524884	0.927035	0.747259	0.830753	0.820591	1.10553
			S10	0.877003	0.627928	0.723207	0.644432	0.770972	0.724906	1.22785
			S11	0.741482	0.532241	0.569463	0.607985	0.54904	0.71488	1.11548
			S12	0.785467	0.510856	0.408899	0.625651	0.492509	0.456418	0.410148
			S13	0.562409	0.21922	0.172598	0.468862	0.289385	0.244453	0.312778
			S14	0.49697	0.251404	0.214837	0.289689	0.212291	0.420686	0.368184
			S15	0.489461	0.331785	0.361381	0.62484	0.442298	0.600189	0.441817
M1	R01	D3	S1	1.67918	1.27041	1.23868	1.68336	1.6463	1.67836	1.48722
			S2	0.83938	0.447809	0.580841		0.353962	0.584178	0.65129
			S3	0.743173	0.54168	0.539307	0.743533	0.465941	0.485124	0.590254
			S4	0.607707	0.384242	0.415999	0.477749	0.347132	0.506887	0.509295
			S5	0.857767	0.638655	0.527975	0.724279	0.771606	0.88725	0.844821
			S6	0.597501	0.547239	0.472254	0.722291	0.49351	0.977316	0.550229
M1	R02	D1	S1	0.308546	0.323306	0.200638	0.263663	0.271772	0.294041	0.395795
			S2	0.662901	1.00367	0.533061	0.409614	0.966669	0.483904	0.683562
			S3	0.541518	0.349397	0.306594	0.222327		0.185761	0.421603
			S4	0.592777	0.378103	0.389749	0.489882	0.248382	0.226478	0.480157
			S5	0.650454	0.714837	0.688176	0.42039	0.690941	0.61159	0.884884
			S6	0.356595	0.608086	0.502433	0.367521	0.438949	0.4459	0.64354
			S7	0.505539	0.457242	0.536001	0.500718	0.452515	0.431996	0.515038
			S8	0.414947	0.4298	0.385592	0.427003	0.452414	0.22361	0.616389
			S9	1.20534	1.69491	1.45595	1.21681	1.66706	1.72015	1.40383
M1	R02	D2	S1	2.52204	1.81865	1.48553	1.88651	1.83523	2.77809	2.65981
			S2	0.758537	1.96747	0.793381	0.890927	0.773055	0.906459	1.29268
			S3	1.80899	1.16819	2.6375	0.801568	1.42779	1.87029	1.46428
			S4	0.731917	0.861749	0.801974	0.566391	0.922877	0.747601	0.682883
			S5	1.64407	1.87813	2.23885	1.89873	3.23068	2.56077	3.34224
M1	R03	D1	S1	0.624294	0.244956	0.170791	0.203746	0.189061	0.231861	0.292905
			S2	1.14024	0.900924	0.882689	1.08434	0.779506	0.795405	1.1278
			S3	0.411093	0.462204	0.337848	0.499658	0.744322	0.445809	0.508341
			S4	0.263047	0.241729	0.35039	0.347327	0.257557	0.404279	0.212365
			S5	0.252372	0.220749	0.28749	0.311914	0.195236	0.28207	0.234093
			S6	0.336276	0.216023	0.299333	0.247675	0.195917	0.153181	0.280105
			S7	0.39088	0.366395	0.577032	0.523561	0.414951	0.656815	0.418921
			S8	0.232476	0.209685	0.257938	0.201932	0.305005	0.209098	0.210114
			S9	0.17512	0.248628	0.193418	0.259769	0.186159	0.156696	0.213709
M1	R03	D2	S1	0.924329	0.567762	0.346883	0.232106	0.36436	0.666476	0.209045
			S2	0.412599	0.459066	0.763122	0.391135	0.840821	0.307993	0.235928
			S3	0.294461	0.245426	0.455458	0.298034	0.444786	0.34534	0.249333
			S4	0.623087	0.520431	0.869315	0.365028	0.594875	0.497251	0.227001
			S5	0.752807	0.623839	0.828379	0.677879	0.793443	0.767631	0.497719
			S6	0.659745	0.489323	1.23449	0.595268	0.568276	0.568269	0.268239
			S7	0.412612	0.226737	0.495996	0.41755	0.604498	0.241851	0.302762
			S8	0.587705	0.443138	0.660802	0.525193	0.453689	0.48092	0.368493
			S9	0.658338	0.595509	0.545465	0.197709	0.472519		0.213029
			S10	0.69318	0.687009	0.53051	0.352619	0.543598		0.376063
			S11	0.861604	0.698001	0.791255	0.403673	0.779745		0.361476
			S12	0.63914	0.79473	0.913977	0.751568	0.829418	0.906799	0.73636
			S13	0.447764	0.640065		0.518697	0.568457	0.694414	0.54583
			S14	0.847735	0.665387	0.84995	0.986306	1.44671	1.26996	1.08289
M1	R03	D3	S1	0.37691	0.742004	0.521143	0.405297	0.411705	0.33357	0.444385
			S2	0.301217	0.355286	0.253558	0.286455	0.185478	0.174496	0.27001
			S3	0.37831	0.505807	0.390241	0.388084	0.33463	0.4031	0.373464
			S4	0.401733	0.68538	0.374601	0.325589	0.234566	0.357835	0.308434
			S5	0.466115	0.418625	0.483025	0.373694	0.335113	0.298698	0.398345
			S6	0.429774	0.384122	0.451324	0.40887	0.416396	0.36102	0.458503
			S7	0.2207	0.118358	0.144548	0.133034	0.147232	0.138775	0.209679
			S8	0.682061	0.56079	0.400186	0.585139	0.735046	0.396933	0.556883
			S9	0.353052	0.450805	0.523061	0.332328	0.448055	0.287714	0.548694
			S10	0.172958	0.215572	0.253759	0.225573	0.148106	0.176937	0.211641
			S11	0.2792	0.258897	0.24846	0.235595	0.153574	0.249989	0.204469
			S12	0.210052	0.289615	0.251526	0.180716	0.186352	0.127221	0.296443
			S13	0.175759	0.236916	0.234803	0.105114	0.121636	0.108444	0.117388
			S14	0.353615	0.312822	0.238804	0.214151	0.270823	0.169684	0.311157
			S15	0.140204	0.233178	0.107673	0.0969981	0.0985334	0.0676808	0.0635673
			S16	0.180588	0.544981	0.25224	0.228585	0.229381	0.195912	0.265788
			S17	0.234481	0.516796	0.401727	0.365877	0.225623	0.293126	0.36163
M1	R03	D4	S1	0.456313	0.49383	0.495769	0.258662	0.209437	0.393196	0.476228
			S2	0.373466	0.361286	0.346377	0.432223	0.465468	0.224705	0.510345
			S3	0.508712	0.547364	0.727894	0.699444	0.657071	0.472658	0.828336
			S4	0.237819	0.570228	0.38476		0.39622	0.318732	0.369068
			S5	0.421717	0.463047	0.322534	0.451394	0.334158	0.284434	0.174683
			S6	0.918465	0.521604	0.913431	0.56089	0.867678	0.709493	0.885703
M1	R04	D1	S1	0.567213	0.387537	0.235582	0.51455	0.156347	0.203588	0.345732
			S2	0.862824	0.715991	0.603865	0.671675	0.481002	0.712582	0.804116
			S3	0.845418	0.613376	0.647557	0.428537	0.253183	0.385436	0.462214
			S4	0.262738	0.214269	0.161699	0.164135	0.116815	0.159025	0.21629
			S5	0.280877	0.212231	0.235768	0.231885	0.274377	0.237938	0.350925
			S6	0.463755	0.489755	0.412157	0.311061	0.266867	0.447014	0.855004
			S7	0.446951	0.276553	0.22664	0.225843	0.340712		0.471864
			S8	0.272416	0.13762	0.0944616	0.10371	0.0765527	0.143402	0.260696
			S9	0.69388	0.556245	0.565174	0.314775	0.397753	0.385002	0.715356
			S10	0.191303	0.197618	0.109882	0.158328	0.0680016	0.062178	0.125995
			S11	0.228521	0.161149	0.150323	0.170636	0.125745	0.194068	0.120377
			S12	0.5315	0.503582	0.299235	0.621039	0.20185	0.1635	0.437507
			S13	0.310882	0.268172	0.146716	0.219517	0.15415	0.186334	0.346159
			S14	0.994649	0.736556	0.809383	1.11688	0.591868	0.639832	0.662481
M1	R04	D2	S1	0.414142	0.301221	0.291333	0.263334	0.187678	0.255565
			S2	0.493552	0.297609	0.177178	0.19229	0.257597	0.335094	0.313289
			S3	0.225679	0.188791	0.15368	0.253801	0.236084	0.165232	0.327366
			S4	0.344311	0.23531	0.449234	0.219724	0.166787	0.20283	0.113056
			S5	0.276011	0.0662811	0.0684064	0.0763603	0.130066	0.226952	0.146475
			S6	0.103029	0.0933452	0.123915	0.119857	0.119495	0.220506
			S7	2.0041	0.699727	0.931864	0.539002	0.781841	0.736376	1.16221
			S8	0.184732	0.188675	0.535917	0.142097	0.103048	0.181792	0.154675
			S9	0.403841	0.228444	0.313005	0.244212	0.150077	0.485887	0.230927
			S10	0.806779	0.382273	0.560943	0.367006	0.330103	0.635787	0.526672
			S11	0.3008	0.142398	0.302994	0.167551	0.116673	0.302566	0.169858
			S12	0.229498	0.138831	0.181159	0.0844275	0.0709519	0.151707	0.10502
			S13	0.664527	0.292729	0.336576	0.290187	0.277455	0.283109
			S14	0.569429	0.330012	0.376799	0.330677	0.383452	0.265035	0.362928
			S15	0.437275	0.345137	0.439295	0.311482	0.285294	0.359962	0.219902
			S16	0.3721	0.191367	0.200175	0.142195	0.0977785	0.262506	0.274993
M2	R01	D1	S1	0.681221	0.728682	0.680588	0.861398	0.513039	1.1194	0.737255
			S2	0.385609	0.610224	0.640514	0.531877	0.303076		0.71709
			S3	0.394784	0.578804	0.530134	0.413702	0.421863		0.584585
			S4	0.483666	0.301899	0.423577	0.300267	0.130416		0.259366
			S5	0.19442	0.167498	0.307654	0.218118	0.149741	0.283527	0.236456
			S6	0.108101	0.112517	0.115876	0.219928	0.0651894	0.100494	0.200652
			S7	0.367709	0.438605	0.327595	0.442164	0.222287		0.247697
			S8	0.50744	0.530499	0.54652	0.576134	0.29986	0.668028	0.63648
			S9	0.211699	0.291258	0.146296	0.219617	0.14667	0.228796	0.179278
			S10	0.611531	0.577048	0.625638	0.407923	0.515974	0.778251	0.74175
			S11	0.139988	0.185485	0.216091	0.131806	0.131622	0.231672	0.21665
			S12	0.349917	0.142339	1.01328	0.289045	0.0565182	0.469558	0.250807
			S13	0.652798	0.864377	0.763276	0.806232	0.29225	0.892962	0.598974
M3	R01	D1	S1	0.364995	0.30349	0.392112	0.387417	0.285789	0.393611	0.404068
			S2	0.260172	0.444233	0.32311	0.354187	0.236542	0.314317	0.426599
			S3	0.559506	0.434622	0.376825	0.349979	0.53971	0.236087	0.403713
			S4	0.225041	0.237387	0.168645	0.187015	0.25642	0.134419	0.224656
			S5	0.306228	0.161825	0.290347	0.3405	0.169799	0.19433	0.20398
M3	R01	D2	S1	0.537955	0.311209	0.223081	0.263997	0.19128	0.174931	0.227242
			S2	0.442821	0.46822	0.518607	0.502677	0.419907	0.45991	0.494159
			S3	0.210704	0.313503	0.328223	0.254367	0.257121	0.196006	0.197103
			S4	0.21745	0.331658		0.125029	0.188034	0.0955454	0.231365
			S5	1.01951	0.638592	0.939029	1.25359	0.9297	0.640914	0.734501
			S6	1.65189	1.40019	1.49047	0.926632	0.571634	0.43859	0.646614
			S7	0.522024	0.493011	0.82475	1.06658	0.426749	0.421095	0.609191
			S8	0.315678	0.630462	0.438734	1.0385	0.553156	0.277324	0.35044
			S9	0.570508	0.441075	0.776867	0.616	0.443938	0.534009	0.958031
			S10	0.309526	0.43444	0.55128	0.547891	0.492917	0.399123	0.748294
			S11	1.10278	0.515181	0.635943	0.716606	0.819001	0.628526	0.49457
			S12	0.747003	0.416782	0.860308	0.657567	0.842275	0.469265	0.561491
			S13	0.647353	0.427903	0.553344	0.41306	0.54593	0.267094	0.406333
			S14	0.183778	0.438126	0.153483	0.202116	0.126436	0.0836087	0.255376
			S15	0.239246	0.11397	0.133059	0.166141	0.136213	0.147824	0.203971
			S16	0.264863	0.232469	0.316709	0.182093	0.284917	0.272746	0.412948
			S17	0.461018	0.541991	0.546964	0.568528	0.449759	0.474784	0.511646
			S18	0.523495	0.375039	0.248076	0.33633	0.439993	0.299552	0.493824
M3	R01	D3	S1	0.599562	0.73815	0.729329	0.882109	0.895509	0.815669	0.743099
			S2	0.371728	0.624135	0.534642	0.460721	0.650604	0.579384	0.500163
			S3	1.38149	1.00672	1.32588	1.01377	1.19334	1.12775	1.17193
			S4	0.391351	0.710095	0.560675	0.218433	0.562601	0.395193	0.597068
			S5	0.806323	0.814766	1.28883	1.05503	1.01191	0.772038	1.03626
M3	R01	D4	S1	0.175598	0.198892	0.205071	0.190853	0.248657	0.147723	0.198154
			S2	0.660914	0.554026	0.535629	0.625154	0.501229	0.462841	0.596014
			S3	0.525274	0.248925	0.261226	0.248207	0.37002	0.207389	0.428816
			S4	0.352977	0.211816	0.210931	0.120126	0.151654	0.0856034	0.116604
M3	R02	D1	S1	0.307987	0.344269	0.351994	0.282724	0.192426	0.278753	0.514234
			S2	0.301911	0.187789	0.259811	0.259087	0.159927	0.305405	0.19672
			S3	0.246269	0.314344	0.254132	0.340026	0.295348	0.343273	0.31602
			S4	0.619984	1.601	0.808686	0.962992	0.961959	1.0371	0.950138
M3	R02	D2	S1	0.556659	0.590591	0.501806	0.661572	0.793732	0.802762	0.625564
			S2	0.498553	0.571283	0.622462	0.730679	0.367746	0.263037	0.571103
			S3	0.316422	0.208034	0.194723	0.351058	0.389417	0.230664	0.263607
			S4	0.422825	0.372616	0.360926	0.498973	0.402258	0.373553	0.549432
			S5	0.391593	0.292591	0.287026	0.384253	0.269271	0.255064	0.243274
			S6	0.799597	0.731746	0.740577	0.992703	1.30851	1.21534	0.903506
			S7	0.531171	1.01878	0.822118	0.621232	0.560973	0.637059	0.60395
			S8	0.385629	0.594881	0.449068	0.36618	0.78224	0.304588	0.407489
			S9	0.61803	1.05532	1.87456	1.53035	1.53939	0.831924	1.18024
M3	R02	D3	S1	0.146244	0.248418	0.147384	0.293769	0.154637	0.190049	0.150997
			S2	0.945494	1.06373	1.27391	1.38535	1.17938	0.793183	1.04316
			S3	0.286609	0.172943	0.4488	0.246891	0.280225	0.15149	0.160353
			S4	0.582806	0.737296	0.406804	0.671172	0.359606	0.574059	0.610307
			S5	0.507836	0.639667	0.610286	0.586136	0.710284	0.466092	0.554032
			S6	0.458801	0.741692	0.459007	0.554714	0.705166	0.308054	0.5287
M4	R01	D1
			S1	0.0813632	0.235041	0.0535728	0.196258	0.101952	0.110062
			S2	0.451506	0.723749	0.241243	0.738187	0.60204	0.525441	0.497174
			S3	1.19231	1.08736	1.01568	1.31376	1.13188	1.23997
			S4	0.358757	0.600528	0.690267	0.805953	0.476858	0.533792	0.482407
			S5	0.313865	0.370989	0.464096	0.448154	0.244682	0.269181	0.668848
			S6	0.261166	0.422648	0.236686	0.400588	0.296025	0.283165	0.283411
			S7	0.310625	0.421517	0.68422	0.566812	0.43564	0.458169	0.298272
			S8	0.780407	1.15373	0.926233	0.889633	0.471291	1.23695	1.10606
			S9	1.95902	2.71938	2.99008	3.52928	1.67815	2.42835	2.12929
			S10	0.443929	0.646819	0.752063	0.696386	0.497097	0.61715	0.755763
			S11	0.147556	0.178492	0.273354	0.0899175	0.174587	0.196477	0.296293
			S12	0.280881	0.316046	0.300421	0.291144	0.291248	0.182743	0.294859
			S13	0.338107	0.346611	0.469542	0.465961	0.628586	0.388996	0.49065
			S14	0.450001	0.688518	0.535908	0.516106	0.34921	0.523822
			S15	0.10599	0.123061	0.128029	0.10414	0.107997	0.101944
			S16	0.854418	0.538888	0.645775	0.563115	0.465295	0.731909
			S17	0.830967	1.19185	1.02864	1.10188	1.53096	0.809115	1.36562
M4	R01	D2	S1	0.287122	0.275627	0.324525	0.315324	0.294104	0.214445	0.270346
			S2	0.240621	0.3071	0.215417	0.217195	0.200144	0.210831	0.193808
			S3	0.314691	0.185749	0.268499	0.287636	0.177484	0.209518	0.0971733
			S4	0.353153	0.269104	0.196144	0.21213	0.177969	0.180521	0.289716
			S5	0.124026	0.0838559	0.0732862	0.10624	0.101246	0.0952205
			S6	0.184654	0.0591853	0.126762	0.0793531	0.13253	0.072178	0.0716929
			S7	0.203916	0.374688	0.321482	0.279733	0.430347	0.255408	0.330243
			S8	0.0789129	0.0826313	0.102864	0.0501593	0.162723	0.0810208	0.125678
			S9	0.548941	0.519523	0.5309	0.557077	1.09773	0.357016	0.626741
			S10	0.214517	0.293893	0.258385	0.216969	0.197024	0.266152	0.088
			S11	0.0558594	0.0500614	0.0863014	0.0453056	0.0579508	0.0414851	0.0706884
			S12	0.0562833	0.0741953	0.0314493	0.0367924	0.0536927	0.0405496	0.0584884
			S13	0.255511	0.328685	0.450033	0.365726	0.370917	0.377977	0.348656
			S14	0.0967503	0.104676	0.20849	0.0914768	0.0889019	0.140285	0.179817
			S15	0.220736	0.195896	0.343357	0.238682	0.170096	0.228892	0.291578
			S16	0.128668	0.0510849	0.227169	0.127866	0.11838	0.114604	0.150654
			S17	0.59372	0.390269	0.71857	0.463213	0.645016	0.44494	0.331132
			S18	0.590744	0.43559	0.575555	0.4458	0.398465	0.44736	0.362562
			S19	0.348899	0.187468	0.293401	0.383338	0.20555	0.151611	0.228632
			S20	0.133512	0.14942	0.109747	0.144869	0.10922	0.11099	0.165991
			S21	0.830802	0.396769	0.249678	0.210068	0.230112	0.382031	0.487045
			S22	0.131762	0.0714653	0.14342	0.0896297	0.129662	0.0904914	0.106561
M4	R01	D3	S1	0.251535	0.319671	0.0873475	0.25153	0.311124	0.104598	0.24241
			S2	0.240546	0.200345	0.42235	0.280651	0.382464	0.168846	0.243558
			S3	1.00729	1.11214	2.24213	1.59823	1.96634	0.690232	1.36417
			S4	0.1138	0.100978	0.1722	0.1655	0.167393	0.0346787
			S5	0.147489	0.212236	0.216976	0.225585	0.245129	0.0938234	0.169279
			S6	0.135059	0.146693	0.126194	0.151319	0.0613936	0.123063	0.155974
M4	R02	D1	S1	0.252613	0.179759	0.285406	0.226674	0.203121	0.201454	0.215109
			S2	0.297833	0.228638	0.349947	0.240061	0.184726	0.203557	0.11425
			S3	0.135787	0.181132	0.33408	0.275095	0.31126	0.386724	0.289818
			S4	0.186996	0.230325	0.102675	0.109778	0.155815	0.0943745	0.0699769
			S5	0.344996	0.13801	0.063107	0.112002	0.144664	0.156489	0.102932
			S6	0.662611	0.340183	0.479726	0.458942	0.460451	0.368487	0.246774
			S7	0.471262	0.41359	0.332072	0.35976	0.187254	0.171704	0.119286
			S8	0.2225	0.189127	0.124629	0.163813	0.0889564	0.216428	0.111099
			S9	0.22821	0.281268	0.141822	0.151686	0.0956098	0.236182	0.194346
			S10	0.117431	0.224196	0.14304	0.0645777	0.118672	0.0791103	0.261215
			S11	0.717636	0.644795	0.572365	0.637953	0.67524	0.63115	0.531989
			S12	0.249513	0.248492	0.161217	0.182445	0.142821	0.110708
			S13	0.646185	0.362519	0.367587	0.3463	0.366817	0.17162	0.872094
			S14	0.105359	0.125782	0.11317	0.115177	0.0922697	0.281313	0.135144
			S15	1.05044	0.533498	0.728322	0.767962	0.751388	0.672293	0.738268
			S16	0.858634	0.363263	0.828725	0.611382	0.668267	0.540349	0.67356
			S17	0.307323	0.281599	0.253792	0.400851	0.252061	0.199216	0.208253
			S18	0.21737	0.18838	0.284814	0.344252	0.205562	0.217777	0.173385
			S19	0.350276	0.308685	0.327304	0.337473	0.267103	0.262077	0.209631
			S20	0.402791	0.381679	0.368585	0.542109	0.482056	0.39783	0.384471
			S21	0.483336	0.228222	0.204332	0.325879	0.1504	0.228249	0.226923
			S22	0.537415	0.752748	0.475821	0.496076	0.346341	0.439921	0.391429
M4	R02	D2	S1	0.303391	0.138395	0.338649	0.368555	0.171755	0.228933	0.240816
			S2	0.303374	0.254175	0.202807	0.18803	0.217139	0.239722	0.264816
			S3	0.359491	0.456351	0.358022	0.424739	0.385797	0.306261	0.558312
			S4	0.431802	0.385241	0.283528	0.388305	0.322372	0.427831	0.481016
			S5	0.153818	0.218364	0.203546	0.147782	0.0970945	0.162846	0.158899
			S6	0.118863	0.181201	0.240964	0.218505	0.229096	0.233007	0.160459
			S7	0.159585	0.212209	0.241298	0.23437	0.142372	0.175935	0.233388
			S8	0.832369	1.05063	1.15817	0.809824	1.00539	1.12723	0.872227
			S9	0.509452	0.422593	0.57126	0.6101	0.709059	0.576272	0.633468
M4	R02	D3	S1	0.519921	0.337427	0.316804	0.319616	0.329416	0.299552	0.41052
			S2	1.52247	0.674681	0.672323	1.07165	0.618168	0.639502	0.507953
			S3	0.17109	0.109937	0.15949	0.163604	0.229645	0.151598	0.262548
			S4	0.336301	0.281819	0.400418	0.331366	0.292574	0.283948	0.310093
			S5	0.321864	0.387837	0.454028	0.430247	0.405764	0.401528	0.509446
			S6	0.301118	0.343105	0.336599	0.400688	0.274219	0.31243	0.322297
			S7	0.301953	0.306942	0.280758	0.327414	0.19087	0.291591	0.29167
			S8	0.399755	0.412999	0.674416	0.623791	0.332921	0.414377	0.506579
			S9	0.249062	0.173121	0.194112	0.304396	0.172744	0.208537	0.2533
			S10	0.165119	0.119455	0.190645	0.147511	0.15817	0.184122	0.220102
			S11	0.148948	0.183832	0.176862	0.172277	0.10218	0.13043	0.132529
			S12	0.375273	0.358374	0.303615	0.316301	0.204002	0.33674	0.289882
			S13	0.0744472	0.146994	0.143527	0.233682	0.164315	0.169848	0.150928
			S14	0.165621	0.181032	0.218115	0.23723	0.214585	0.191714	0.17488
			S15	0.276813	0.216407	0.207764	0.227442	0.190477	0.198394	0.10656
			S16	0.24455	0.289679	0.30377	0.25113	0.142184	0.24657	0.26031
			S17	0.176281	0.176298	0.189092	0.289765	0.181224	0.185959	0.273274
			S18	0.235562	0.199019	0.401442	0.233465	0.282313	0.33423	0.173924
			S19	0.347697	0.346735	0.322153	0.45296	0.370161	0.277871	0.527953
			S20	0.197965	0.254089	0.166064	0.210471	0.133862	0.198431	0.19765
			S21	0.317	0.20696	0.225979	0.24143	0.119138	0.138648	0.256072
			S22	0.378798	0.384204	0.388282	0.41568	0.379033	0.328894	0.56054
M4	R03	D1	S1	0.105732	0.12111	0.236996	0.106598	0.11396	0.138334	0.0854567
			S2	0.134125	0.263137	0.205171	0.125565	0.215523	0.125301	0.134007
			S3	0.115508	0.128921	0.134476	0.0799548	0.0947692	0.0828761	0.0947282
			S4	0.101392	0.0946403	0.120891	0.173996	0.145214	0.141767	0.21782
			S5	0.0548346	0.0625796	0.0343458	0.0823875	0.044322	0.0311178	0.0922234
			S6	0.118426	0.335699	0.140201	0.1747	0.135343	0.0701621	0.0847093
			S7	0.410703	0.597037	0.48927	0.312358	0.319183	0.416642	0.361445
			S8	0.196845	0.260344	0.216041	0.195385	0.242627	0.13792	0.121269
			S9	0.0387778	0.072838	0.0834933	0.0355146	0.0717136	0.0550421	0.0460846
			S10	0.148137	0.232412	0.114352	0.16054	0.127188	0.0610866	0.10522
			S11	0.182889	0.134825	0.095343	0.128196	0.0937059	0.122746	0.126832
			S12	0.427942	0.425449	0.433517	0.405171	0.336998	0.254107	0.313316
			S13	0.127686	0.28269	0.253331	0.195531	0.178527	0.184904	0.132016
			S14	0.122508	0.266762	0.123175	0.124275	0.119165	0.136044	0.12581
M4	R03	D2	S1	0.100856	0.0916041	0.0461851	0.0518536	0.0650548	0.116134	0.0608042
			S2	0.113233	0.166246	0.222078	0.188458	0.17295	0.145202	0.144005
			S3	0.149322	0.218189	0.326844	0.220679	0.226157	0.195852	0.204617
			S4	0.130276	0.167971	0.147892	0.114228	0.169821	0.0923757	0.152213
			S5	0.0944546	0.136511	0.121567	0.118601	0.157885	0.0889357	0.0889132
			S6	0.0793563	0.104599	0.0889018	0.0756138	0.094588	0.0863721	0.0764943
			S7	0.057399	0.0848627	0.0526789	0.0573973	0.0701362	0.0707366	0.0641747
			S8	0.0787608	0.0738333	0.0638954	0.0359622	0.0558891	0.0584052	0.0977481
			S9	0.0755202	0.125584	0.0868759	0.0815462	0.101939	0.131038	0.060438
			S10	0.0645144	0.0809144	0.0750886	0.109011	0.0625498	0.0619027	0.0428436
			S11	0.0689687	0.164742	0.110461	0.170237	0.0652943	0.108525	0.0865558
			S12	0.101441	0.112553	0.0802323	0.0945125	0.126979	0.125578	0.089208
			S13	0.255433	0.190628	0.147685	0.187548	0.262712	0.396008	0.223854
			S14	0.218759	0.186429	0.21225	0.180382	0.192381	0.170106	0.174067
			S15	0.412953	0.431117	0.4121	0.324583	0.442404	0.366611	0.352744
			S16	0.0423095	0.0780605	0.0523633	0.0768371	0.0596828	0.0647672	0.0404965
			S17	0.0506541	0.0480909	0.0692282	0.0767868	0.0454222	0.0800495	0.0533964
			S18	0.293908	0.307942	0.347383	0.4139	0.313331	0.31767	0.220318
			S19	0.134113	0.0739072	0.0848733	0.0854845	0.102458	0.0965967	0.0461924
			S20	0.0660207	0.0745921	0.0857771	0.072921	0.132354	0.0688233	0.0662248
			S21	0.0975213	0.0882741	0.0988524	0.0538812	0.0546977	0.136882	0.0572367
			S22	0.230694	0.297181	0.137246	0.214651	0.216376	0.149434	0.0994325
			S23	0.193234	0.300963	0.109129	0.110309	0.092105	0.117546	0.0862082
			S24	0.194911	0.309522	0.227249	0.241011	0.202557	0.493338	0.25107
M5	R01	D1	S1	0.759796	0.684393	0.82635	1.24339	0.652209	0.896225	0.841484
			S2	0.6186	0.373818	0.223179	0.337077	0.295618	0.0981357	0.37413
			S3	0.517485	0.831007	0.52212	0.698345	0.847775	0.582753	1.01566
			S4	0.647482	0.530743	0.420478	0.48793	0.390312	0.537963	0.686156
			S5	0.672928	0.501152	0.37649	0.427107	0.508698	0.426235	0.554215
			S6	0.25271	0.286904	0.337891	0.253285	0.273113	0.18724	0.401052
			S7	0.326613	0.388832	0.231278	0.280178	0.357015	0.159434	0.253969
			S8	1.94703	2.32473	1.8362	3.03524	1.61939	1.69202	2.36573
			S9	0.453872	0.334766	0.21701	0.364245	0.281289	0.282998	0.56411
M5	R01	D2	S1	0.281474	0.256607	0.18134	0.119053	0.196738	0.166889	0.239012
			S2	0.140545	0.10008	0.0597158	0.151863	0.120516	0.112536	0.148616
			S3	0.474298	0.441898	0.467435	0.489166	0.36254	0.523582	0.563293
			S4	0.373245	0.446525	0.427811	0.542779	0.308666	0.424441
			S5	0.196347	0.235441	0.226353	0.103786	0.145353	0.175735	0.226953
			S6	0.193457	0.226593	0.14038	0.195479	0.153842	0.200643
			S7	0.217016	0.239168	0.220826	0.215907	0.187711	0.222275
			S8	0.303638	0.269998	0.327939	0.306821	0.162487	0.202855
			S9	0.376523	0.454129	0.304782	0.382366	0.21674	0.395937	0.629997
			S10	0.14913	0.198774	0.152243	0.131867	0.134943	0.161665	0.101112
			S11	0.342577	0.254713	0.377072	0.280021	0.295474	0.317693	0.32447
			S12	0.437102	0.585512	0.588951	0.42714	0.614319	0.529709	0.923118
			S13	0.738225	0.498926	0.787324	1.02632	0.746051	1.0846
			S14	0.44092	0.847576	1.40373	0.849588	0.630565	0.580592
			S15	0.481482	0.39994	0.503414	0.24443	0.460182	0.448481	0.690885
			S16	0.163019	0.172863	0.128269	0.115982	0.165902	0.255569	0.178261
			S17	0.651386	0.575954	0.602258	0.57661	0.479625	1.10484	0.794922
			S18	0.564924	0.326485	0.414987	0.218523	0.244137	0.239039	0.462029
			S19	0.46813	0.415796	0.461307	0.380415	0.385672	0.539751	0.890655
			S20	0.341513	0.330155	0.284162	0.258674	0.293318	0.314385	0.511719
			S21	0.374301	0.408597	0.245602	0.395825	0.284478	0.438049	0.52032
			S22	0.137613	0.131203	0.11685	0.114688	0.14945	0.153805	0.136011
			S23	0.390102	0.431573	0.531699	0.560215	0.51255	0.571185
			S24	0.198571	0.201836	0.170177	0.192169	0.168245	0.208539	0.288807
			S25	0.163918	0.155913	0.133959	0.165437	0.129345	0.153493	0.178023
			S26	0.234327	0.303133	0.210142	0.180793	0.155703	0.13944	0.195425
			S27	0.960788	1.03429	0.865561	0.802956	0.944102	0.963218	1.33348
			S28	0.292638	0.193514	0.242105	0.182702	0.132351	0.222818	0.355405
M5	R01	D3	S1	0.149761	0.118589	0.155903	0.0658273	0.120906	0.132407	0.0994099
			S2	0.112825	0.169294	0.185717	0.136756	0.0847089	0.228527	0.157034
			S3	0.154278	0.090543	0.446785	0.270889	0.247737	0.196441	0.185584
			S4	0.210829	0.153685	0.252286	0.221421	0.179054	0.157227	0.140249
			S5	0.257021	0.239134	0.672403	0.288633	0.182574	0.227398	0.180014
			S6	0.248914	0.236953	0.319437	0.249926	0.250213	0.201493	0.28991
			S7	0.322979	0.259196	0.320874	0.278359	0.247012	0.22017	0.269377
			S8	0.294041	0.32498	0.492872	0.382036	0.280884	0.279453	0.339686
			S9	0.220522	0.155717	0.258409	0.17291	0.190482	0.157044	0.177203
			S10	0.163598	0.088505	0.16615	0.194528	0.144713	0.145656	0.145371
			S11	0.293957	0.336706	0.499379	0.340496	0.273893	0.321472	0.603925
			S12	0.19022	0.140687	0.249969	0.257935	0.154963	0.162794
			S13	0.2026	0.357451	0.393616	0.231356	0.212428	0.230793	0.236679
			S14	0.080491	0.108061	0.128338	0.0584023	0.0525915	0.0881619	0.137302
			S15	0.346191	0.323875	0.628363	0.473595	0.357591	0.292729	0.399792
M5	R02	D1	S1	0.0993507	0.0971343	0.0904074	0.103914	0.0747885		0.103909
			S2	0.181489	0.120185	0.123822		0.151182	0.156065	0.146307
			S3	0.130103		0.121676	0.174992	0.17739	0.185665	0.204352
			S4	0.138624	0.212258	0.181112		0.162751		0.154394
			S5	0.202728	0.338964	0.329292	0.262261	0.36357	0.258161	0.317713
			S6	0.0803781	0.161509	0.129308	0.110996	0.217924	0.196286	0.0836434
			S7	0.132047	0.288088	0.09635		0.216141	0.139384	0.118404
			S8		0.162136	0.29527	0.173321	0.156687	0.197297	0.214981
M5	R02	D2	S1	0.245353	0.12886	0.239822	0.106643	0.195885	0.176957	0.0825185
			S2	0.243838	0.143747	0.184718	0.13558	0.12882	0.143367	0.224242
			S3	0.486698	0.764942	0.854249	0.667288	0.593911	0.501751	0.52319
			S4	0.164202	0.165292	0.180913	0.175949	0.113981	0.170099	0.156096

## Sheet: Spine sGluA1 per dendrite 
	Dendrite ID	Day1	Day2	Day3	Day4	Day5	Day6	Day10
Control-spine sGluA1-V1 L2/3 apical dendrites
(Fig.1H)	D1	0.927002	1.06987	0.916126	0.82642	0.86044	0.900597	1.01752
	D2	0.919954	0.878342	1.16597	0.798402	0.961772	0.682891	1.00573
	D3	0.799402	0.939529	1.192	0.957826	0.735842	0.822214	0.953987
	D4	0.925906	0.977566	1.00579	0.876559	0.876396	0.924754	0.792696
	D5	1.04614	0.972067	0.955664	1.00128	1.21396	1.21054	1.16728
	D6	1.19648	0.843028	0.883977	0.913463	0.957429	0.870044	1.02736
	D7	1.13857	0.873908	0.856894	0.880285	0.784498	0.766643	0.674068
	D8	1.08783	0.915055	0.964091	1.00139	1.24925	1.24597	1.39702
	D9	0.948776	1.04771	0.87722	0.837169	0.822001	0.91078	1.0362
	D10	1.06583	0.971438	0.918932	1.05333	1.36655	0.863579	0.950202
	D11	0.905753	0.948604	1.0725	0.901587	0.950912	1.10372	1.18781
	D12	0.966	0.990586	0.950581	1.10143	1.09311	0.94941	1.15922
	D13	1.01087	1.18633	0.751378	0.76263	0.59416	0.708648	0.843418
	D14	0.962061	0.913282	0.994803	0.993764	0.97433	0.901646	0.773075
	D15	0.87145	0.886811	1.2186	0.679499	0.908357	0.791978	0.905809
	D16	1.00021	0.815438	1.15607	1.04796	0.922463	0.876597	0.753065
	D17	1.05521	0.951946	0.922551	0.966475	1.02679	1.06538	0.954165
	D18	0.958531	1.00123	0.863041	0.692795	0.978091	0.771017	1.20358
	D19	1.00674	0.919347	1.0389	0.99857	0.978989	1.20612	1.19164
	D20	1.05441	0.955195	0.953752	1.32411	0.773818	0.857075	1.06188
	D21	1.04056	0.953283	0.88573	0.907762	1.25535	1.03738	1.31379
	D22	1.02953	0.876681	0.940294	0.941462	0.917068	0.99499	1.02725
	D23	0.965995	0.926416	0.996935	0.949859	0.902467	0.972692	1.13376
VD-spine sGluA1-V1-L2/3-apical dendrites
(Fig. 3B)		BL1	BL2	BL3	VD1	VD2	VD3	VD7
	D1	0.897301	0.980524	1.03952	0.958536	1.287	1.21293	1.45255
	D2	0.874291	0.835999	1.23245	0.886794	1.13252	1.25552	1.40433
	D3	1.02023	1.10374	0.842517	0.938551	0.79042	0.982737	1.07248
	D4	0.952564	1.11779	0.88798	0.988085	1.11573	0.99735	1.35393
	D5	0.811105	1.15039	0.835617	0.85207	1.31995	0.886859	1.36328
	D6	0.876026	1.09341	0.998927	1.16501	1.10203	1.18617	1.62639
	D7	0.893176	0.934929	1.09619	1.07555	1.27028	1.20953	1.64219
	D8	1.23748	0.81404	0.857664	0.780777	0.841565	0.833749	1.39985
	D9	1.1007	0.873729	0.955912	0.739551	0.816148	0.747698	0.906035
	D10	1.03768	0.920942	1.01413	0.960378	0.913448	0.919685	1.07609
	D11	1.14951	0.832327	0.990509	0.568654	1.07748	1.20717	1.47056
	D12	1.06357	0.947691	0.961411	0.905976	1.19324	0.983646	1.32663
	D13	0.899872	0.894426	1.14111	1.21045	0.952238	0.999043	1.18998
	D14	0.836273	1.09591	0.983929	0.884847	1.14492	1.13994	1.27769
	D15	1.00075	0.968952	1.01129	0.98483	0.809899	1.24994	1.51488
	D16	0.884847	1.01197	1.03865	1.08891	0.864861	1.18285	1.60591
	D17	0.941408	0.978214	0.948009	1.07483	1.33446	1.15818	1.45009
	D18	1.09919	0.822112	0.957427	0.986839	0.861939	0.878998	1.19124
	D19	1.09613	0.819744	0.853658	0.72861	1.73297	1.13114	1.21807
	D20	1.10616	0.915244	0.924208	0.771445	1.37485	0.994027	0.981979
	D21	1.09088	0.762669	1.08375	0.856063	1.23894	1.11878	1.13913
	D22	1.10218	0.785582	1.06543	0.993994	1.10615	0.963285	1.29537
	D23	0.966278	0.912619	1.07155	1.03706	0.87627	1.03691	1.1017
	D24	0.894587	1.06189	0.959169	0.739426	0.929878	0.600707	0.824905
	D25	0.816261	0.717263	1.41868	0.959631	0.82457	0.891674	1.21414
	D26	0.980246	1.02826	0.929911	0.681097	0.686596	0.91628	0.974621
	D27	1.02964	1.01444	0.923086	0.846092	0.990203	0.88631	1.18588
	D28	0.932248	0.979972	1.02441	0.69469	1.00494	0.872829	0.80744
	D29	0.864839	0.931053	1.13844	0.978985	0.917116	0.799813	1.17126
	D30	1.01129	0.935742	1.01191	1.00175	1.03607	1.0257	1.05525
	D31	0.921597	0.977672	0.982285	0.851534	0.932261	0.808477	0.845662
	D32	0.834022	1.0075	1.07721	0.804296	1.09139	0.852799	0.822009
	D33	1.08315	0.903136	0.932548	0.759701	0.906945	0.983302	0.725542
	D34	0.953029	0.969122	1.03418	0.745368	0.714141	0.908876	0.822487
	D35	0.926514	0.985117	1.04779	0.826207	0.815968	1.18235	0.949314
	D36	0.973088	1.00923	0.947842	0.698034	0.655103	0.741312	0.859817
	D37	0.957243	1.05355	0.898432	0.661469	0.656099	0.736087	0.616416
	D38	0.889073	0.962761	1.06608	0.814135	0.79059	0.754378	1.07334
	D39	1.10775	0.807175	1.03932	0.587175	0.786112	1.0271	0.946989
	D40	0.991475	1.14061	0.825799	1.30416	1.02113	1.00583	1.01917
	D41	0.840654	0.989409	1.11542	1.13805	0.948396	0.972858	1.20231
	D42	0.901844	0.968303	1.0944	1.16859	1.0843	1.28237	1.21367
	D43	0.997468	1.06727	0.856664	0.881079	0.912283	0.867467	1.2435
	D44	1.09699	0.930708	0.905337	0.871872	0.957557	0.959118	1.1293
	D45	0.967354	1.11672	0.819389	0.804318	1.15029	1.16143	1.42862
	D46	1.07909	1.02049	0.83659	0.857351	0.94635	1.26832	1.37312
	D47	0.990033	0.910681	1.0164	0.915796	1.02642	0.830689	1.03207
	D48	0.981332	0.987681	0.971503	0.793545	0.959751	1.15822	1.10148
	D49	1.0504	1.07463	0.865176	0.805428	0.926787	0.997315	0.760375
VD-spine sGluA1-non_V1 L2/3-apical dendrites
(Fig. 3E)		BL1	BL2	BL3	VD1	VD2	VD3	VD7
	D1	0.903381	1.02156	0.967309	1.26472	1.19697	0.836952	1.17945
	D2	0.965938	0.962842	0.98693	0.892101	0.940186	0.872048	1.17157
	D3	1.01849	0.99711	0.916112	1.09542	0.74891	0.826561	1.08937
	D4	0.904723	1.22926	0.835192	0.904668	1.02186	0.988131	0.887384
	D5	0.945759	1.12202	0.901569	0.896439	0.921212	0.772257	0.755462
	D6	1.28293	0.923969	0.654277	0.795775	0.641167	0.574031	0.774262
	D7	0.971022	0.928826	1.02053	1.09054	1.04145	0.926293	1.15678
	D8	0.892051	1.03242	0.991055	1.11208	1.25717	1.3798	1.47332
	D9	0.959413	0.802292	1.14901	1.06292	0.996146	0.897672	0.867205
	D10	1.06278	0.965744	0.885285	0.827674	0.791981	0.77982	0.639066
	D11	1.03781	1.1184	0.791529	0.838443	0.660826	0.708113	0.65398
	D12	0.999883	0.957604	0.970381	1.13076	1.13588	1.08455	0.856789
	D13	0.98918	1.05142	0.885451	0.754742	0.811003	0.757431	1.00399
	D14	0.997445	0.987851	0.926847	0.926334	0.784235	0.779032	0.860447
	D15	1.16008	0.877147	0.920681	0.995892	0.862205	0.989355	0.937953
	D16	1.04942	1.00969	0.847152	0.919413	0.783772	0.9158	1.23568
	D17	0.9052	0.975001	1.02791	0.986644	0.842481	0.876566	0.871607
	D18	1.0823	0.854323	0.993775	0.924983	0.714255	0.834329	0.944312
	D19	1.00156	0.923321	1.02264	1.00251	1.06565	0.972584	0.999952
	D20	0.993415	1.07155	0.86006	0.666382	0.688996	0.751467	0.982645
	D21	1.13165	1.09822	0.692061	0.611817	0.578497	0.522933	0.895044
	D22	0.836989	0.975685	1.11159	0.693432	0.735574	0.901065	0.870703
	D23	0.857415	0.79585	1.23706	0.698088	0.875558	0.722457	0.845323
	D24	1.12908	0.89358	0.901378	0.858346	0.849357	0.849047	0.843202
	D25	0.711751	1.28564	0.959021	0.79927	0.962787	0.817361	0.898086
	D26	0.929421	1.01432	0.995405	0.750835	1.05619	0.891099	0.884157
	D27	0.986626	0.993653	0.961929	0.739847	0.803271	0.866518	0.761136
	D28	0.936822	0.952543	1.01927	0.964091	1.45256	1.23788	1.07387
	D29	0.94395	0.943415	1.09139	0.517953	0.691012	0.671443	0.555418
	D30	1.08332	0.789634	1.04521	0.622196	0.679282	0.853378	0.705006
	D31	0.866437	0.973254	1.02276	0.82926	0.883053	0.938896	1.11414
	D32	1.11701	0.80419	1.0323	1.06539	0.997084	0.814919	0.783944
	D33	1.17936	0.925061	0.813865	1.07641	0.958823	0.858863	0.92379
VD-Spine sGluA1-V1 L2/3-basal dendrites
(Fig. 5F)		BL1	BL2	BL3	VD1	VD2	VD3	VD7
	D1	0.911275	1.05367	0.984541	1.37152	1.47056	0.908263	1.42797
	D2	0.857156	1.05588	1.0381	1.62525	1.46567	1.12394	1.21657
	D3	0.760393	1.03621	1.14855	1.17693	1.78721	1.24121	1.55537
	D4	0.951408	0.965001	1.04953	0.92039	0.902636	0.711128	0.886057
	D5	0.926914	0.990644	1.03169	1.12837	1.36424	0.95486	1.29118
	D6	1.0592	0.92861	0.999525	1.02136	1.10777	0.91879	0.969503
	D7	0.999353	0.919704	1.00084	0.958841	1.5097	1.22801	1.98638
	D8	0.859198	1.05618	1.0538	1.15987	1.17069	1.22538	1.64779
	D9	0.78652	1.09796	1.09596	1.01077	1.67959	1.02341	1.69756
	D10	0.919683	1.07637	0.967004	1.16504	1.73019	1.09773	1.20568
	D11	0.81179	1.06013	1.06246	0.84763	0.772835	0.665625	1.26027
	D12	1.01005	0.923321	1.03349	1.09942	0.954552	1.0039	1.24856
	D13	0.987937	0.902531	1.07047	0.970494	1.20837	0.989795	1.20267
	D14	1.03327	0.992001	0.927992	0.866435	1.03623	1.15018	1.51512
	D15	0.977562	0.870789	1.11361	1.10803	1.02377	1.12749	1.0765
	D16	0.952891	1.02337	0.980378	0.733173	0.76903	1.08155	1.0271
	D17	1.00698	0.956276	0.974854	1.02858	1.04385	1.0749	1.22017
	D18	0.986915	0.934741	1.04688	1.15137	1.03715	1.1896	1.50773
	D19	1.12603	0.818899	1.0043	0.908112	1.06219	1.04759	1.14569
	D20	0.92212	0.889408	1.12521	1.04257	1.14923	1.02303	1.19585
	D21	0.914138	1.02518	0.997967	1.14205	1.08343	1.15925	1.1813
	D22	0.930601	0.913644	1.10543	1.25505	1.31956	1.46243	1.38917
	D23	1.02421	0.897293	1.02954	1.25835	1.16477	1.60065	2.13522
	D24	1.02482	0.895737	1.03255	1.08438	0.9166	1.15318	1.35226
	D25	1.04873	0.8551	1.06175	1.3687	1.13211	1.07496	1.4382
	D26	0.922951	1.00873	0.997715	1.32757	1.07626	0.996266	1.34445
	D27	0.951721	0.952415	0.993935	0.975104	1.06152	1.0929	1.07027
	D28	1.03578	0.95609	0.923195	0.918238	0.892243	1.26839	1.08577
	D29	0.990736	0.990108	0.979766	1.10902	0.850846	1.13448	1.37062
	D30	1.01197	0.842416	0.706104	0.844747	1.01012	1.63865	2.08815
	D31	0.812123	1.08875	1.07187	1.02265	1.03698	1.27439	1.25192
	D32	0.927831	1.089	0.956943	0.855419	1.04721	1.00799	1.47722
	D33	0.982363	1.11731	0.864195	1.20071	0.981606	1.09768	0.996123
	D34	1.03799	1.15861	0.730112	1.16709	1.09961	1.25154	1.00082
	D35	1.05165	0.9454	0.954371	0.965573	1.06615	0.937802	0.957881
	D36	1.04019	0.94413	0.970409	1.06	0.975779	1.0796	0.943221
	D37	1.03511	0.917494	0.958613	0.978055	1.07872	1.15966	1.00725
	D38	0.977521	0.944232	1.0331	1.1141	1.12963	1.04236	0.933465
	D39	0.894202	1.04252	1.00254	1.17056	1.13031	0.942766	1.08424
	D40	1.01379	0.946566	1.02167	1.08157	1.05065	1.03106	1.00735
VD-Spine sGluA1-V1 L5-apicall dendrites
(Fig. 6F)		BL1	BL2	BL3	VD1	VD2	VD3	VD7
	D1	0.831118	0.944397	1.14563	0.930831	1.18765	1.1036	1.22104
	D2	1.14545	0.904227	0.908918	1.10555	0.990041	0.924323	0.945935
	D3	1.15459	0.763654	0.976457	0.707061	0.927759	0.728135	0.649544
	D4	1.19619	0.748776	0.968085	0.781976	0.893197	0.961705	1.01589
	D5	1.18165	0.691981	0.894217	0.717626	0.717342	0.906392	0.721194
	D6	0.847116	0.959365	1.05126	0.761802	0.591572	0.631316	0.697551
	D7	1.02682	1.12412	0.845494	0.945098	0.72261	0.920705	1.07339
	D8	0.968181	1.00058	0.909879	0.747372	0.852832	0.893593	0.703436
	D9	0.860011	0.937586	1.08161	0.97111	1.57083	0.91528	1.12208
	D10	1.12531	0.936502	0.906326	0.824679	0.823966	1.05282	1.38173
	D11	1.05974	0.878569	0.998765	0.979036	1.05988	0.861616	1.23894
	D12	0.998529	1.01737	0.945103	0.975888	1.02542	1.27856	1.37416
	D13	1.18478	0.892936	0.882608	0.961911	1.00395	1.30174	1.28926
	D14	1.07071	1.01091	0.863067	0.875333	1.14763	1.27943	1.16224
	D15	1.18987	0.869547	0.923228	0.858045	0.922917	0.976808	0.908273
	D16	0.962431	0.961898	1.04041	0.874829	1.03017	0.721043	0.809115
	D17	0.89581	1.03137	1.03204	0.856573	1.27462	1.05631	0.882955
	D18	0.982969	1.03205	0.899317	0.735266	1.16122	1.20217	1.0898
	D19	0.990775	1.04008	0.923343	1.03855	0.767958	1.12107	1.01277
	D20	0.946454	0.970182	1.00061	0.780939	1.19024	1.31255	1.33033
	D21	0.952553	1.08948	0.819708	0.875937	1.00534	1.0816	1.46318
	D22	1.01883	0.986733	0.940828	0.940915	1.22035	1.08458	1.10698
	D23	0.980237	0.995989	0.94353	1.11868	1.16391	1.09519	1.22183
	D24	1.04575	1.04764	0.840548	0.820548	1.08702	1.04207	0.764139
	D25	1.10554	0.992321	0.87063	0.876503	0.867287	1.1764	1.15704
	D26	1.23847	0.940964	0.749533	0.615806	0.730714	0.616575	1.16511
	D27	1.09595	0.951303	0.900966	1.03367	1.07746	1.59476	1.39218
	D28	1.00023	1.1006	0.836315	0.820145	1.00896	0.945967	0.866316
	D29	1.24361	0.898711	0.830635	0.960144	0.674914	1.15763	0.898046
	D30	1.0244	0.945762	0.967956	0.695763	0.751648	1.15021	0.937362
	D31	1.11972	0.974831	0.875283	0.704354	0.649735	0.947059	1.05155
	D32	0.954612	0.972397	1.04831	0.88293	0.716074	1.21264	1.01453
	D33	0.852463	1.10655	0.977926	0.903057	0.849214	0.849157	0.928376
	D34	1.04565	0.945607	0.98662	0.762431	0.746125	1.07632	0.944699
	D35	0.890552	1.04209	0.948009	1.03939	1.17804	1.2839	1.16451
VD-Spine sGluA1-V1 L2/3-apicall dendrites (GRIP1 KO)
(Fig. 7E)		BL1	BL2	BL3	VD1	VD2	VD3	VD7
	D1	0.907197	1.09375	0.905352	1.07504	1.02129	0.948605	0.963048
	D2	1.26609	0.831886	0.836566	1.14093	1.00908	0.97111	1.1653
	D3	1.23889	0.878174	0.874108	1.16639	0.857577	1.15033	1.06993
	D4	1.0054	1.06017	0.893369	0.796406	0.962237	0.748726	1.15953
	D5	0.913714	1.00683	0.968833	0.739784	0.984241	1.06637	1.11936
	D6	1.06345	0.896972	0.967075	1.03486	0.90956	0.929362	0.966526
	D7	0.98964	0.851945	1.10482	0.720542	1.02802	0.931895	0.586028
	D8	0.892655	1.12405	0.923999	0.797738	0.740797	0.673878	0.872137
	D9	0.922408	1.00614	1.01491	0.905023	0.909922	0.769233	0.980149
	D10	1.24075	0.964855	0.767272	0.862843	0.591006	0.697645	1.07244
	D11	1.25628	0.726004	0.921328	0.67305	0.620453	0.93151	0.776548
	D12	0.897774	0.91228	1.08802	0.947226	0.545135	1.18075	0.995929
	D13	1.04468	0.947823	0.955018	1.00773	0.884003	0.763405	1.01621
	D14	1.00124	0.92004	0.984465	0.965545	0.846422	0.656121	0.933747
	D15	0.838884	1.02788	1.09821	0.83503	1.11097	0.929894	1.02876
	D16	1.20933	0.871744	0.880697	0.771133	0.913112	0.589365	0.875298
	D17	0.886977	1.09132	0.951415	1.01123	0.785744	1.07214	1.07273
	D18	0.919574	1.01507	1.00347	1.15268	1.1485	0.871786	1.00601
	D19	0.885399	1.06156	0.975108	1.11897	0.968263	0.743194	0.859879
	D20	0.841574	1.06395	1.03955	1.06713	0.883722	0.943975	1.08964
	D21	1.02483	0.841334	1.03001	0.850855	0.923891	0.803687	0.886496
	D22	0.874145	0.947407	1.0392	1.12786	1.11325	0.500732	0.976052
	D23	1.10783	0.92356	0.872109	0.90979	0.775841	0.809653	0.771831
	D24	0.929887	0.957736	1.054	1.02572	0.87733	0.990419	1.05764
	D25	1.0021	0.929111	1.02284	1.10924	0.833045	0.919179	1.01449
	D26	0.812965	1.1637	0.943812	0.851725	0.839549	0.694347	0.764416
	D27	0.914205	1.09747	0.929386	0.921111	0.953094	1.01487	0.777521
	D28	1.09852	1.04449	0.80569	1.04153	0.911525	0.71787	1.19532
	D29	1.00804	1.00095	0.950458	0.885793	0.830568	1.00396	1.25276
	D30	0.857558	0.788966	1.29706	0.899858	0.764055	0.818171	0.891145
	D31	0.887048	1.09292	0.956012	0.985079	1.09356	1.08135	0.965894
	D32	1.00626	0.841837	1.10076	0.776758	0.77797	0.825477	0.754498
